# Supplementary material for: Efficacy of acupuncture versus sham acupuncture or waitlist control for patients with chronic plantar fasciitis: study protocol for a two-centre randomised controlled trial
Source: PubMed Central journal article supplement — BMJ Open. 2020 Sep 25;10(9):e036773. doi: 10.1136/bmjopen-2020-036773 (PMC7520861; doi:10.1136/bmjopen-2020-036773), 2020-09-25
Supplement: bmjopen-2020-036773.draft_revisions.pdf [file bmjopen-2020-036773.draft_revisions.pdf]

# BMJ Open

BMJ Open is committed to open peer review. As part of this commitment we make the peer review history of every article we publish publicly available.

When an article is published we post the peer reviewers' comments and the authors' responses online. We also post the versions of the paper that were used during peer review. These are the versions that the peer review comments apply to.

The versions of the paper that follow are the versions that were submitted during the peer review process. They are not the versions of record or the final published versions. They should not be cited or distributed as the published version of this manuscript.

BMJ Open is an open access journal and the full, final, typeset and author-corrected version of record of the manuscript is available on our site with no access controls, subscription charges or pay-per-view fees (<http://bmjopen.bmj.com>).

If you have any questions on BMJ Open's open peer review process please email [info.bmjopen@bmj.com](mailto:info.bmjopen@bmj.com)

# BMJ Open

## Efficacy of acupuncture vs sham acupuncture or waitlist control for patients with chronic plantar fasciitis: study protocol for a 2-center randomized controlled trial

|                               |                                                                                                                                                                                                                                                                                                                                                                                                                                                                                                                                                                                                                                                                                               |
|-------------------------------|-----------------------------------------------------------------------------------------------------------------------------------------------------------------------------------------------------------------------------------------------------------------------------------------------------------------------------------------------------------------------------------------------------------------------------------------------------------------------------------------------------------------------------------------------------------------------------------------------------------------------------------------------------------------------------------------------|
| Journal:                      | <i>BMJ Open</i>                                                                                                                                                                                                                                                                                                                                                                                                                                                                                                                                                                                                                                                                               |
| Manuscript ID                 | bmjopen-2020-036773                                                                                                                                                                                                                                                                                                                                                                                                                                                                                                                                                                                                                                                                           |
| Article Type:                 | Protocol                                                                                                                                                                                                                                                                                                                                                                                                                                                                                                                                                                                                                                                                                      |
| Date Submitted by the Author: | 03-Jan-2020                                                                                                                                                                                                                                                                                                                                                                                                                                                                                                                                                                                                                                                                                   |
| Complete List of Authors:     | Wang, Weiming; Guang'anmen Hospital, China Academy of Chinese Medical Sciences, Department of acupuncture<br>Liu, Sixing; Guizhou University of Traditional Chinese Medicine, School of Acupuncture-Moxibustion and Tuina,<br>Liu, Yan<br>Zang, Zhiwei; Yantai Hospital of Traditional Chinese Medicine, Department of Acupuncture<br>Zhang, Weina; Guang'anmen Hospital, China Academy of Chinese Medical Sciences, Department of Acupuncture<br>Li, Liang; Guang'anmen Hospital, China Academy of Chinese Medical Sciences, Department of Ultrasound<br>Liu, zhishun; Guang'an men Hospital Affiliated to China Academy of Chinese Medical Sciences, acupuncture and moxibustion department |
| Keywords:                     | COMPLEMENTARY MEDICINE, PAIN MANAGEMENT, Clinical trials < THERAPEUTICS                                                                                                                                                                                                                                                                                                                                                                                                                                                                                                                                                                                                                       |
|                               |                                                                                                                                                                                                                                                                                                                                                                                                                                                                                                                                                                                                                                                                                               |

SCHOLARONE™  
Manuscripts

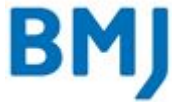

I, the Submitting Author has the right to grant and does grant on behalf of all authors of the Work (as defined in the below author licence), an exclusive licence and/or a non-exclusive licence for contributions from authors who are: i) UK Crown employees; ii) where BMJ has agreed a CC-BY licence shall apply, and/or iii) in accordance with the terms applicable for US Federal Government officers or employees acting as part of their official duties; on a worldwide, perpetual, irrevocable, royalty-free basis to BMJ Publishing Group Ltd ("BMJ") its licensees and where the relevant Journal is co-owned by BMJ to the co-owners of the Journal, to publish the Work in this journal and any other BMJ products and to exploit all rights, as set out in our [licence](#).

The Submitting Author accepts and understands that any supply made under these terms is made by BMJ to the Submitting Author unless you are acting as an employee on behalf of your employer or a postgraduate student of an affiliated institution which is paying any applicable article publishing charge ("APC") for Open Access articles. Where the Submitting Author wishes to make the Work available on an Open Access basis (and intends to pay the relevant APC), the terms of reuse of such Open Access shall be governed by a Creative Commons licence – details of these licences and which [Creative Commons](#) licence will apply to this Work are set out in our licence referred to above.

Other than as permitted in any relevant BMJ Author's Self Archiving Policies, I confirm this Work has not been accepted for publication elsewhere, is not being considered for publication elsewhere and does not duplicate material already published. I confirm all authors consent to publication of this Work and authorise the granting of this licence.

1  
2  
3 Title page  
4  
5  
6

7 Article title:  
8  
9

10 **Efficacy of acupuncture vs sham acupuncture or waitlist control for**  
11 **patients with chronic plantar fasciitis: study protocol for a 2-center**  
12 **randomized controlled trial**  
13  
14  
15  
16

17 Weiming Wang, MD, PhD<sup>1\*</sup>; Sixing Liu, BS<sup>2\*</sup>; Yan Liu, MD<sup>3\*</sup>; Zhiwei Zang, MD<sup>4</sup>;  
18 Weina Zhang, BS<sup>1</sup>; Liang Li, MD<sup>5</sup>; Zhishun Liu, MD, PhD<sup>1†</sup>  
19  
20  
21  
22

23 1 Department of Acupuncture, Guang'anmen Hospital, China Academy of Chinese  
24 Medical Sciences, Beijing, China  
25  
26

27 2 School of Acupuncture–Moxibustion and Tuina, Guizhou University of Traditional  
28 Chinese Medicine, Guiyang, China  
29  
30

31 3 Key Laboratory of Chinese Internal Medicine of Ministry of Education,  
32 Dongzhimen Hospital, Beijing University of Chinese Medicine, Beijing, China  
33  
34

35 4 Department of Acupuncture, Yantai Hospital of Traditional Chinese Medicine,  
36 Yantai, China  
37  
38

39 5 Department of Ultrasound, Guang'anmen Hospital, China Academy of Chinese  
40 Medical Sciences, Beijing, China  
41  
42  
43

44 \*These authors contributed equally to this work.  
45  
46

47 †Corresponding author: Department of Acupuncture and Moxibustion, Guang' an  
48 Men Hospital, China Academy of Chinese Medical Sciences, No.5 Beixiang St.,  
49 Xicheng District, Beijing, China, Email: zhishunjournal@163.com.  
50  
51  
52

53 **Running title:** acupuncture for chronic plantar fasciitis  
54  
55  
56

57 **Word count: abstract 268; main text 3950.**  
58  
59  
60

## Abstract

**Introduction:** Plantar fasciitis (PF) is reported to be the most common cause of plantar heel pain. Acupuncture has been used for patients experiencing PF, but evidence of the efficacy of acupuncture on PF is limited. The primary objective of this trial is to compare combined acupuncture and sham acupuncture (SA) versus waitlist control for improving the level of pain experienced by patients suffering from chronic PF.

**Methods and Analysis:** This will be a two-center, parallel-group, sham and no-treatment controlled, assessor-blinded randomized trial. We will randomly allocate 120 participants with chronic PF to acupuncture, SA, and waitlist control groups at a ratio of 2:1:1. Participants in the acupuncture and SA groups will receive a 30-minute acupuncture or SA treatment for a total of 12 sessions over 4 weeks, with a 12-week follow-up. Participants in the waitlist control group will not undergo treatment for a period of 16 weeks but instead will have the option of 4 weeks (12 sessions) of acupuncture free of charge at the end of the follow-up period. The primary outcome will be the treatment response rate 4 weeks after randomization, assessed as a minimum of 50% improvement in the worst pain intensity during the first steps in the morning compared with the baseline. All analyses will be performed with a 2-sided *P* value of  $< 0.05$  considered significant following the intention-to-treat principle.

**Ethics and Dissemination:** The study has been approved by the Ethical Committee of the Guang'anmen Hospital, China Academy of Chinese Medical Sciences (approval No: 2019-210-KY). The results will be disseminated through presentation

1  
2  
3  
4 at a peer-reviewed medical journal, the relevant conferences and scientific meetings.  
5

6 **Key words:** acupuncture; chronic plantar fasciitis; pain intensity; clinical trial  
7

8  
9 **Trial registration:** ClinicalTrials.gov identifier: NCT 04185259.  
10

11 **Strengths and limitations of this study:**  
12

13  
14 ▶ This study is the first randomized controlled trial comparing combined  
15  
16 acupuncture and sham acupuncture versus waitlist control for pain relief in  
17  
18 participants with chronic PF.  
19

20  
21  
22 ▶ Sham control and waitlist control design, objective measurements (i.e. PPT, PFT),  
23  
24 strict quality control and evaluation of participants' expectation regarding  
25  
26 acupuncture, aiming to reduce the risk of bias.  
27

28  
29  
30 ▶ Acupuncturists and participants in the waitlist control group will not be blinded,  
31  
32 which may cause bias.  
33

34  
35 ▶ A high dropout rate may exist in the waitlist group because participants expect to  
36  
37 receive acupuncture treatment when they join the trial.  
38

39  
40 ▶ The 12-week follow-up will not allow the detection of the long-term effects of  
41  
42 acupuncture on chronic PF.  
43  
44  
45  
46  
47  
48  
49  
50  
51  
52  
53  
54  
55  
56  
57  
58  
59  
60

## Background

Plantar fasciitis (PF), which presents with heel pain and tenderness particularly at the plantar aspect of the calcaneal tuberosity<sup>1</sup> upon the initiation of weight bearing, is one of the most prevalent complaints encountered by foot and ankle specialists. It is reported that 1 in 10 people suffer from inferior heel pain within their lifetime<sup>2</sup> and this condition is attributed to PF in 80% of cases.<sup>3</sup> PF predominantly affects elderly and middle-aged individuals<sup>4</sup> and is more frequent in runners or those whose employment requires standing.<sup>5</sup> The exact etiology of PF is multifactorial and not completely understood. Physical-mechanical overload and micro tears within the fascia<sup>6,7</sup> could be involved in the development of PF, resulting in localized inflammation and degeneration of the proximal plantar aponeurosis.<sup>8</sup>

The available treatment options for PF mainly include non-operative treatments (e.g., plantar fascia and gastrocnemius soleus muscle stretching, heel cups, arch supports, night splints, nonsteroidal antiinflammatory drugs (NSAIDs), local corticosteroid injections), and operative management.<sup>9</sup> However, no consensus has been reached regarding the most beneficial treatment method for PF.<sup>10</sup> Although conservative treatment of PF is successful in the vast majority of cases<sup>11</sup> and many PF cases are self-limiting and eventually enter remission, it can take up to months or even years for patients to recover.<sup>12</sup> Moreover, approximately 10 to 20% of patients are recalcitrant to conventional treatments, resulting in foot pain and/or disabilities for years.<sup>13</sup>

Acupuncture, an integral part of traditional Chinese medicine (TCM), is a technique whereby the acupoints located on specific body areas are pierced with fine needles for therapeutic purposes based on the principles of TCM.<sup>14</sup> Acupuncture has been used in the management of PF and other musculoskeletal pain-related conditions

1  
2  
3 for thousands of years. Mechanistic studies have revealed that acupuncture can induce  
4 an analgesic response via the release of neuropeptides (e.g., enkephalin, dynorphin,  
5  $\beta$ -endorphin, and endomorphin).<sup>15</sup> Two recent systematic reviews <sup>16,17</sup> found that  
6 acupuncture may reduce pain intensity and improve plantar function for patients with  
7 PF. However, there were methodological problems with the small sample sizes, lack  
8 of control with a placebo/waitlist group, or no adjustment for the confounding effects  
9 of patients who received combination treatments in the design of the included  
10 acupuncture literature. Therefore, the placebo effects of acupuncture and spontaneous  
11 remission of PF cannot be excluded and the beneficial effects of acupuncture for PF  
12 remain in need of further assessment.  
13  
14  
15  
16  
17  
18  
19  
20  
21  
22  
23  
24  
25

26 We designed a randomized controlled trial to evaluate the efficacy of acupuncture,  
27 compared with sham acupuncture (SA) or being on a waitlist control group, for  
28 patients with chronic PF for >6 months. Given that clinical and experimental results  
29 have shown that SA can induce a significant alleviation of pain similar to verum  
30 acupuncture <sup>18</sup> due to non-specific effects (e.g., acupuncture expectations), the  
31 primary hypothesis in this trial was that combined acupuncture and SA will result in  
32 larger improvements in heel pain than no acupuncture treatment in patients with  
33 chronic PF. The secondary hypothesis examined whether acupuncture can reduce heel  
34 pain intensity more effectively than SA or no acupuncture.  
35  
36  
37  
38  
39  
40  
41  
42  
43  
44  
45  
46

## 47 **Methods and design**

### 48 **Study design**

49 This will be a two-center, parallel-group, sham and no-treatment controlled,  
50 assessor-blinded randomized trial comprising three arms with a 2:1:1 allocation rate.  
51 We will design the protocol in accordance with standard protocol items including the  
52 Recommendations for Interventional Trials <sup>19</sup> and the Standards for Reporting  
53  
54  
55  
56  
57  
58  
59  
60



1  
2  
3 Interventions in the Clinical Trials of Acupuncture<sup>20</sup> guidelines. The study flow chart  
4  
5 and study schedule are shown in Figs. 1 and 2.  
6  
7

### 8 **Study setting and recruitment**

9  
10 This trial is planned to be conducted at Guang'anmen Hospital, China Academy of  
11  
12 Chinese Medical Sciences, and Yantai Hospital of Traditional Chinese Medicine from  
13  
14 March 2020 to March 2022. A total of 120 participants will be publicly recruited  
15  
16 through the use of posters and hospital webs in the two participating hospitals. The  
17  
18 duration of the trial for each participant will be 17 weeks: 1-week baseline, 4-week  
19  
20 treatment, and 12-week follow-up.  
21  
22

### 23 **Randomization and Blinding**

24  
25 The eligible participants who sign an informed consent form will complete a 1-week  
26  
27 baseline assessment before randomization. Participants will be randomized into the  
28  
29 acupuncture group, SA group, or waitlist (no acupuncture) group at a ratio of 2:1:1  
30  
31 using simple randomization. Randomization will be generated with the PROC PLAN  
32  
33 in SAS 9.4 (SAS Institute Inc., Cary, NC, USA). Details of the group allocation will  
34  
35 be concealed on cards inside sealed opaque envelopes by the staff member  
36  
37 responsible for the allocation. A research coordinator, who will not be involved in the  
38  
39 treatment and outcome assessments, will be responsible for contacting participants  
40  
41 and allocating them to their assigned group. Participants in the acupuncture and SA  
42  
43 groups, together with efficacy evaluators and data analysts will be blinded to the  
44  
45 group assignments. Participants in the waitlist control group and acupuncturists will  
46  
47 not be blinded.  
48  
49  
50  
51  
52

### 53 **Participants**

54  
55 Participants with a diagnosis of PF by an orthopedist on clinical grounds will be  
56  
57 included in the study only if they meet all of the following inclusion criteria and do  
58  
59  
60

1  
2  
3 not fulfill any of the exclusion criteria. Diagnosis of PF will be made according to the  
4  
5 guidelines described by the Orthopaedic Section of American Physical Therapy  
6  
7 Association.<sup>21</sup> The following clinical findings will be used to diagnose PF: plantar  
8  
9 medial heel pain during the initial steps after a period of inactivity but also worse pain  
10  
11 following prolonged weight bearing, heel pain precipitated by a recent increase in  
12  
13 weight-bearing activity, physical examination findings (heel pain with palpation of  
14  
15 the proximal insertion of the plantar fascia), as well as a positive windlass test and  
16  
17 negative tarsal tunnel tests.  
18  
19  
20

21  
22 **Inclusion criteria:**

- 23  
24 1. Age  $\geq 18$  years and  $\leq 75$  years;  
25  
26 2. History of plantar medial heel pain for at least 6 months before enrolment;  
27  
28 3. Reported an average worst pain intensity at first steps in the morning over the last  
29  
30 7 days of at least 50 mm on a 100-mm visual analog scale (VAS) before  
31  
32 enrolment;  
33  
34 4. Failure to respond to conservative treatment for  $\geq 1$  months, including any of the  
35  
36 following modalities: stretching exercises, nonsteroidal anti-inflammatory drugs,  
37  
38 and orthotics;  
39  
40 5. Ability to comply with the study protocol, understand the medical information  
41  
42 forms as well as having provided informed consent.  
43  
44  
45  
46

47  
48 **Exclusion criteria:**

- 49  
50 1. History of calcaneus fracture, calcaneal bone tumor or cyst, plantar fascia rupture,  
51  
52 or having a significant foot deformity (clubfoot, pes cavus, or pes  
53  
54 calcaneovalgus);  
55  
56 2. Previous injection (corticosteroid, platelet-rich plasma, lidocaine needling), or  
57  
58 radiation, or surgery to plantar fascia within 6 months preceding enrollment;  
59  
60

- 1
- 2
- 3 3. Radiculopathy or peripheral neuropathy around the ankle joint such as nerve
- 4
- 5 entrapment tarsal tunnel syndrome or Achilles tendinopathy;
- 6
- 7
- 8 4. Systemic disorders like rheumatoid arthritis, gout, Reiter syndrome, type 1 or 2
- 9
- 10 diabetes mellitus, osteoporosis, spondyloarthritis, or osteomyelitis;
- 11
- 12
- 13 5. Joint, bone, or skin infection in the affected foot;
- 14
- 15 6. Clinically significant cardiovascular disorder, severe hepatic/renal insufficiency or
- 16
- 17 coagulation disorder at baseline as determined by the investigator;
- 18
- 19 7. Known phobia to acupuncture or receiving acupuncture treatment within 4 weeks
- 20
- 21 prior to enrollment.
- 22

## 23 **Interventions**

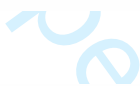

### 24 **Acupuncture group**

25

26 The acupuncture protocol was developed by the consensus of three experts based on

27

28 the meridian theory of TCM and was used in our previous trial.<sup>22</sup> Licensed

29

30 acupuncturists with more than 2 years of acupuncture experience will perform the

31

32 treatment. We will apply needles to two Ashi points (the two most severe tender

33

34 points in the most sensitive area over the anteromedial aspect of the heels, according

35

36 to the participant's perceived pain upon palpation) as well as the Chengshan (BL57),

37

38 Taixi (KI3), and Kunlun (BL60) acupoints in this trial. The position of the

39

40 aforementioned acupoints will be based on the Nomenclature and location of

41

42 acupuncture points <sup>23</sup> designated by the National Standard of the People's Republic of

43

44 China (GB/T 12 346-2006). Sterile disposable stainless steel needles (Hwato brand,

45

46 Suzhou Medical Appliance Factory, Suzhou, China; 0.3 mm × 40 mm) will be used.

47

48 With the patient in a prone position, the local skin will be routinely sterilized,

49

50 followed by pasting a 10-mm diameter and 5-mm thick sterile adhesive pad (Hwato

51

52 brand, Suzhou Medical Appliance Factory, Suzhou, China) onto each selected

53

54

55

56

57

58

59

60

1  
2  
3 acupoint. Ashi points will be perpendicularly inserted through the pad to the plantar  
4 fascia layer with a depth of approximately 15-20 mm depending on the location.  
5  
6 BL57, KI3, and BL60 will be punched perpendicularly 10-15 mm deep into the skin  
7  
8 through the pad. All needles except the Ashi points will be manually stimulated with  
9  
10 small, equal manipulations of lifting, thrusting, twirling, and rotating to achieve De qi  
11  
12 (a sensation including soreness, numbness, distention, and heaviness).<sup>24</sup> Needles will  
13  
14 be retained for 30 minutes per treatment. During each treatment, every needle will be  
15  
16 manipulated three times every 10 minutes.  
17  
18  
19  
20

### 21 **SA group**

22  
23 In the SA group, sham Ashi (0.5 cun away from Ashi, one ‘cun’ is equivalent to the  
24 greatest width of the individual patients’ thumb, ~1.5 cm), sham BL57 (0.5 cun lateral  
25 to the true BL57 horizontally), sham KI3 (midway between the true KI3 and the  
26 heel tendon) and sham BL60 (midway between the true BL60 and the heel tendon)  
27  
28 will be used. The treatment protocol will be similar to that of the acupuncture group.  
29  
30 The Hwato-brand disposable blunt-tipped needles (size 0.30 × 25 mm) will be  
31  
32 inserted at the sham points through the adhesive pads attached to the skin without skin  
33  
34 penetration. The needles will then be lifted, thrust, twirled, and rotated evenly three  
35  
36 times every 10 minutes. No specific De qi response will be elicited.  
37  
38  
39  
40  
41  
42  
43  
44

### 45 **Waitlist control group**

46  
47 Participants will receive no treatment for their heel pain for a period of 16 weeks after  
48 randomization, and subsequently have the option of 4 weeks (12 sessions) of  
49  
50 acupuncture free of charge at the end of the follow-up period.  
51  
52

53  
54 The intervention will last for 30 minutes in the acupuncture and SA groups, and  
55  
56 will be performed three times per week for a total of 12 sessions in four consecutive  
57  
58 weeks. If participants suffer pain bilaterally, the acupuncturists will treat both sides  
59  
60

1  
2  
3 and evaluate the more severe side. Participants in all groups will be treated and (or)  
4  
5 evaluated separately. Participants in all groups will be advised to use soft heel foot  
6  
7 wear, not to stand for a long time, and not to walk barefoot during the study.  
8  
9

### 10 **Rescue medication**

11  
12 Additional therapies for heel pain during the entire study period will be prohibited.  
13  
14 However, the investigator will be permitted to prescribe ibuprofen (sustained release  
15  
16 type, 300 mg/T, Tianjin Smith Kline & French Laboratories Ltd., Tianjin, China) as  
17  
18 rescue medication no more than 2 days per week up to the maximum daily dose if  
19  
20 unbearable heel pain occurs. Participants will be required not to take rescue  
21  
22 medication within 72 h before the baseline and outcome measurements. In the event  
23  
24 rescue medication needs to be taken after the baseline measurement, the participant  
25  
26 will postpone the next visit to the treatment center.  
27  
28  
29

### 30 **Outcome measures**

#### 31 **Primary outcome**

32  
33 The primary outcome used in this trial will be the proportion of participants with a  
34  
35 treatment response 4 weeks after randomization, defined as a minimum of 50%  
36  
37 improvement in the worst pain intensity during the first steps in the morning  
38  
39 compared with the baseline. The average worst pain intensity over the last 3 days will  
40  
41 be used for analysis in this trial. Pain intensity will be measured using a 0-100 VAS,  
42  
43 with 0 indicating no pain and 100 indicating maximal pain. Participants who must  
44  
45 resort to additional treatments other than rescue medication will be classified as  
46  
47 nonresponders. In addition, the responder rate at weeks 8 and weeks 16 will also be  
48  
49 assessed.  
50  
51  
52  
53  
54

#### 55 **Secondary outcomes**

56  
57 The secondary outcomes are as follows:  
58  
59  
60

- 1  
2  
3 1. Changes in the VAS score for worst pain intensity during the first steps in the  
4 morning from baseline to 4, 8, and 16 weeks after randomization;  
5  
6  
7
- 8 2. Changes in the VAS score for mean pain intensity during the day from baseline to  
9  
10 4, 8, and 16 weeks after randomization;  
11  
12
- 13 3. Changes in the pressure pain threshold (PPT) at the most painful area from  
14 baseline to 4, 8, and 16 weeks after randomization. PPT is defined as the  
15 minimum pressure detected when the sensation of pressure first changes to a  
16 sensation of pain.<sup>25</sup> PPT will be tested with a pressure algometer (Fabrication  
17 Enterprises, Inc., White Plains, NY; from 1 kg/cm<sup>2</sup> to 5 kg/cm<sup>2</sup>) using a metal  
18 probe with a 0.5 cm<sup>2</sup> rubber disc by a trained researcher. PPT will be measured  
19 when the participant is lying supine in a relaxed position with the affected foot  
20 hanging over the edge of the bed. When measuring the PPT, the rubber disc will  
21 be placed perpendicularly on the painful spot and pressure will be applied at a rate  
22 of approximately 0.1 kg/cm<sup>2</sup>/s through the metal probe of the pressure algometer.  
23 Participants will be informed to report when the initial pain sensation occurs, and  
24 the readings of the algometer will be recorded. The score will be determined by  
25 averaging three repeated measurements with 30 seconds between each trial. All  
26 values below 1 kg/cm<sup>2</sup> will be reported as 0.5 kg/cm<sup>2</sup>.  
27  
28  
29  
30  
31  
32  
33  
34  
35  
36  
37  
38  
39  
40  
41  
42  
43  
44
- 45 4. Changes in the ankle range of motion (AROM) from baseline to 4, 8, and 16  
46 weeks after randomization: The examiner will measure the AROM including  
47 plantar dorsiflexion and plantar flexion using a digital goniometer (Tangxia  
48 Electronic Instrument Factory, Dongguan, from 0° to 360°). Prior to the  
49 measurement, the participant will sit in a relaxed station with the popliteal space at  
50 the edge of the table and their knees with 90° of flexion. The axis of the  
51 goniometer will be placed at the lateral malleolus. The stationary arm will be  
52  
53  
54  
55  
56  
57  
58  
59  
60

1  
2  
3 placed parallel to the fifth metatarsal and the moving arm placed parallel to the  
4  
5 center of the fibular head. The ankle will be passively moved from a neutral  
6  
7 starting position into dorsiflexion and flexion until a firm end feel is elicited<sup>26</sup> and  
8  
9 the readings of the goniometer will be registered. The mean score of three trials  
10  
11 with 10 seconds between each examination will be calculated and used for  
12  
13 analysis.  
14  
15

- 16  
17 5. Changes in the Foot and Ankle Ability Measure (FAAM) total score and subscale  
18  
19 scores from baseline to 4, 8, and 16 weeks after randomization: The FAAM is a  
20  
21 self-reported questionnaire concerning 21 activities of daily living (ADL) items  
22  
23 and eight sports subscale items.<sup>27</sup> Each item is scored on a 0-4 point Likert scale  
24  
25 anchored by 0 (unable to do) and 4 (no difficulty at all), with higher total scores  
26  
27 indicating a higher level of function. The FAAM has a maximum potential score  
28  
29 of 116 (84 ADL and 32 sport subscales). The obtained score (total, ADL, and  
30  
31 sport subscale scores) is divided by the maximum potential score and multiplied  
32  
33 by 100 to obtain a percentage. If the patient does not respond, the specific  
34  
35 question will be left blank and not be a part of the final value of the questionnaire.  
36  
37 In this trial, we will use the previously validated Chinese version of the FAAM.<sup>28</sup>  
38  
39  
40  
41  
42 6. Change in plantar fascia thickness (PFT) from baseline to 4 weeks after  
43  
44 randomization: PFT will be measured at the thickest point closest to the calcaneal  
45  
46 insertion in its medial portion using ultrasound. The ultrasound scan will be  
47  
48 performed using an 8-12 MHz linear probe with the patient in the prone position  
49  
50 at the baseline and at 4 and 16 weeks after randomization.  
51  
52  
53  
54 7. Participant global assessment of improvement: Participants will be asked to rate  
55  
56 their global improvement using a 7-point scale. The improvement will be scaled  
57  
58 from 1 (complete recovery) to 7 (vastly worse), with 2 being obvious  
59  
60

1  
2  
3 improvement, 3 being a little improvement, 4 being no change, 5 being a little  
4  
5 worse, and 6 being obviously worse. The proportions of participants with different  
6  
7 degrees of improvement will be assessed at 4, 8, and 16 weeks after  
8  
9 randomization.  
10  
11

- 12 8. Participants' expectation towards acupuncture at baseline: At baseline,  
13  
14 participants in the acupuncture and SA groups will be asked the following  
15  
16 question: "Do you think acupuncture will be helpful to improve your chronic PF?"  
17  
18 Participant will choose one of the following answers: "Extremely helpful", "Very  
19  
20 helpful", "Helpful", "Not help at all", and "Unclear".  
21  
22
- 23 9. The proportion of participants who have maintained blinding during treatment in  
24  
25 the acupuncture and SA groups: Participants' blindness to the mode of  
26  
27 acupuncture will be assessed five minutes after the end of any treatment in the  
28  
29 fourth week by asking the patients the following question: "Which of the two  
30  
31 acupuncture modalities do you think you received, acupuncture or SA?"  
32  
33 Participants will choose one of the following answers: "Acupuncture", "SA", or  
34  
35 "Unclear". Prior to the question, patients will be informed that they may have  
36  
37 received one of two modalities: acupuncture with a deeper insertion or SA with no  
38  
39 skin penetration.  
40  
41  
42  
43

#### 44 **Safety assessment**

45  
46 The adverse events (AEs) during the entire study will be recorded and described as  
47  
48 acupuncture-related AEs and non-acupuncture-related AEs. Acupuncture-related AEs  
49  
50 include fainting, broken needle, unbearable pain during acupuncture (VAS  $\geq 8$ , using  
51  
52 VAS from 0 [no pain] to 10 [worst pain imaginable]), and other unintended signs or  
53  
54 symptoms after acupuncture (e.g., localized hematoma or infection, nausea, dizziness,  
55  
56 vomiting, headache, palpitations). Detailed information on AEs including the name,  
57  
58  
59  
60



1  
2  
3 onset, end date, intensity, correlation with acupuncture, and outcomes will be  
4  
5 documented in the case report form. Investigators will immediately report serious AEs  
6  
7 (eg, requiring hospitalization, causing disability or impaired ability to work) to the  
8  
9 Medical Ethics Committee of Guang'anmen Hospital, and stop the clinical trial until  
10  
11 further instruction is given.  
12  
13

### 14 **Sample size calculation**

15  
16 Based on the results of a previous study,<sup>13</sup> a sample size of 120 participants will be  
17  
18 enrolled to provide 80% power to detect a difference of 35% between the combined  
19  
20 acupuncture group and waiting-list group in the proportion of participants with  
21  
22 treatment response 4 weeks after randomization at a two-sided significance level of  
23  
24 0.05. The proportion of participants with treatment response after 4 weeks was  
25  
26 assumed to be roughly 12% for the waiting-list group<sup>13</sup>, with an anticipated 10% loss  
27  
28 to follow-up.  
29  
30  
31

### 32 **Statistical analysis**

33  
34 The null hypothesis is that the proportion of participants with treatment response 4  
35  
36 weeks after randomization will be the same for the combined acupuncture groups and  
37  
38 waiting-list group. Data will be presented as mean  $\pm$  standard deviation for  
39  
40 quantitative variables and frequencies (number of cases), with relative frequencies  
41  
42 (percentages) for categorical variables. The primary outcome analysis will use the  
43  
44 Cochran-Mantel-Haenszel (CMH) test to compare the response rate between the  
45  
46 combined acupuncture groups and the waiting-list group. If the result of this analysis  
47  
48 is significant, hierarchical testing will be applied to the acupuncture group versus  
49  
50 waiting-list group, SA group versus waiting-list group, and acupuncture group versus  
51  
52 SA group. For normally distributed quantitative variables, a repeated-measures  
53  
54 analysis of variance (ANOVA) with multiple comparisons post-hoc test will be used  
55  
56  
57  
58  
59  
60

1  
2  
3 when comparing more than two groups and an unpaired T test when comparing two  
4  
5 groups. For non-normally distributed quantitative variables, the non-parametrical  
6  
7 Kruskal-Wallis test and Mann-Whitney test will be performed. For categorical  
8  
9 variables, the Chi square ( $\chi^2$ ) test will be used. A two-tailed test will be applied for all  
10  
11 available data, and a *P* value < 0.05 will be considered statistically significant. All  
12  
13 analyses in this trial will be performed using SPSS software V.20.0 (IBM SPSS  
14  
15 Statistics; IBM Corp, Somers, NY) on the basis of the intention-to-treat (ITT)  
16  
17 population, which will include participants who had been randomized. Missing data  
18  
19 will be completed as the last value observed before dropout.  
20  
21  
22

### 23 24 **Quality control**

25  
26 To ensure the quality of the trial, all the relevant staff will be uniformly trained before  
27  
28 the trial on the purpose and content of the trial (e.g., diagnosis of chronic PF,  
29  
30 inclusion and exclusion criteria, intervention procedures, and outcome measures).  
31

32  
33 Licensed acupuncturists with at least 2 years' acupuncture experience will perform  
34  
35 the treatment. Throughout the trial, strict three-level monitoring will be conducted for  
36  
37 data quality control. Dropouts and withdrawals including the reasons will be recorded  
38  
39 during the trial. Paper-based study data will be stored in locked file cabinets under the  
40  
41 management of the investigators. Electronic records will be stored in a Structured  
42  
43 Query Language (SQL) server database on a limited access, secure server maintained  
44  
45 by the Guang'anmen Hospital, China Academy of Chinese Medical Sciences.  
46  
47  
48

### 49 **Patient and public involvement**

50  
51 The research question of whether combined acupuncture and SA will result in larger  
52  
53 improvements in heel pain than no acupuncture treatment for patients with chronic PF  
54  
55 was first proposed by the investigator after encountering a patient who received SA  
56  
57 and reported a similar improvement in heel pain as another patient who received  
58  
59  
60

1  
2  
3 routine acupuncture in the clinic. Patients were not involved in conceiving or  
4  
5 implementing the study.  
6

### 7 **Ethics and dissemination**

8  
9  
10 This trial will be conducted in accordance with the principles of the Declaration of  
11  
12 Helsinki. The study has been registered at the ClinicalTrials.gov (NCT04185259) and  
13  
14 approved by the Ethical Committee of the Guang'anmen Hospital, China Academy of  
15  
16 Chinese Medical Sciences (approval No: 2019-210-KY). All participants must sign  
17  
18 the informed consent form prior to randomization, and they will be permitted to  
19  
20 withdraw at any time during the trial, with or without reasons being provided. Any  
21  
22 amendment or other change of the protocol will need to be approved by the Ethical  
23  
24 Committee of the Guang'anmen Hospital, China Academy of Chinese Medical  
25  
26 Science, and agreed to by the co-researchers.  
27  
28  
29

30  
31 Following analysis of the data, the findings of this study will be submitted for  
32  
33 publication in a peer-reviewed medical journal. The results will also be disseminated  
34  
35 through presentation at the relevant conferences and scientific meetings.  
36

### 37 **Discussion**

38  
39 Although several reviews and RCTs <sup>16,17,13,29</sup> have been published that focus on  
40  
41 acupuncture for PF, owing to the lack of a placebo control, non-specific physiology  
42  
43 effects of needling and spontaneous remission of PF cannot be excluded. To date, this  
44  
45 is the first randomized trial with three parallel arms, assessing whether combined  
46  
47 acupuncture and SA compared to no treatment control produce a significant reduction  
48  
49 in pain intensity in chronic PF. We anticipate that this study will determine the  
50  
51 efficacy of acupuncture for patients with chronic PF, and improve the care of these  
52  
53 patients in the clinic.  
54  
55  
56  
57  
58  
59  
60

1  
2  
3           Though most PF patients will achieve significant improvement in symptoms  
4  
5 within 1 year regardless of treatment,<sup>30</sup> many will seek treatment before then. Patients  
6  
7 are often interested in alternative treatment options when they cannot obtain a  
8  
9 satisfactory outcome from conservative treatment. In this trial, we recruited only  
10  
11 chronic participants who had failed to respond to conservative treatment prior to  
12  
13 participation. The results can be generalized to patients experiencing chronic  
14  
15 refractory PF.  
16  
17

18  
19           In this study, pain intensity measured with VAS during the first steps in the  
20  
21 morning will be used as the primary outcome. This variable has been used in previous  
22  
23 trials<sup>13,22</sup> and is a meaningful subject outcome measure for the assessment of PF  
24  
25 improvement. In addition, we will also use PPT and PFT as objective secondary  
26  
27 outcomes. PPT is an essential evaluation tool for patients suffering from many  
28  
29 musculoskeletal disorders including PF and provides a reliable process for measuring  
30  
31 participants' responses to mechanical stimuli.<sup>31</sup> Compared to normal asymptomatic  
32  
33 patients, patients with PF often exhibit a thickened plantar fascia on ultrasound.<sup>32</sup>  
34  
35 Therefore, a PFT evaluation would provide information to detect the anatomical  
36  
37 changes that occur in the plantar fascia after acupuncture.  
38  
39

40  
41           The strengths of this study include a sham control (non-penetrating at  
42  
43 non-acupuncture point) and waitlist control design, objective measurements (i.e. PPT,  
44  
45 PFT), strict quality control, and evaluation of the participants' expectations regarding  
46  
47 acupuncture. Several limitations to this trial need to be acknowledged. First, it will be  
48  
49 impossible to blind the acupuncturists and participants in the waitlist control group,  
50  
51 which is a general problem in non-pharmacological interventional trials and can cause  
52  
53 bias. Second, a high dropout rate may exist in the waitlist group because participants  
54  
55 expect to receive acupuncture treatment when they join the trial. Third, the follow-up  
56  
57  
58  
59  
60

1  
2  
3 period will not exceed 12 weeks, which will not allow for detection of the long-term  
4  
5 effects of acupuncture for chronic PF. Fourth, our approach will enable us to draw  
6  
7 conclusions about the selected acupuncture points but not about individualized  
8  
9 treatments.  
10  
11  
12  
13  
14  
15  
16  
17  
18  
19  
20  
21  
22  
23  
24  
25  
26  
27  
28  
29  
30  
31  
32  
33  
34  
35  
36  
37  
38  
39  
40  
41  
42  
43  
44  
45  
46  
47  
48  
49  
50  
51  
52  
53  
54  
55  
56  
57  
58  
59  
60

For peer review only

1  
2  
3  
4  
5  
6 **Ethical Approval and Consent to participate** The study has received approval from  
7  
8 the Institutional Review Boards of Guang'anmen Hospital in China (approval NO.  
9  
10 2019-210-KY, TEL +86-10-88001552), and all investigators complied with the  
11  
12 Helsinki Declaration.  
13  
14

15  
16 **Consent for publication** Not applicable.  
17

18  
19 **Availability of data and materials** All data are fully available without restriction.  
20

21  
22 **Competing interests** The authors declare that they have no competing interests.  
23

24 **Funding** This RCT is funded by China Academy of Chinese Medical Sciences (Grant  
25 No. ZZ13-YQ-019). The funding agency has no role in the design of the study; data  
26 collection, management, analysis, and interpretation of the data; preparation, review,  
27 or approval of the manuscript.  
28  
29  
30

31  
32  
33  
34 **Authors' contributions** Weiming Wang and Zhishun Liu conceived the idea and  
35 designed this trial. Weina Zhang, Zhiwei Zang, Sixing Liu and Liang Li will be  
36 responsible for the recruitment, acupuncture, and assessment respectively. Yan Liu  
37 will be responsible for statistical analysis. This manuscript was drafted by Weiming  
38 Wang and Sixing Liu, and was revised by Yan Liu and Zhishun Liu. All authors read  
39 and approved the final draft of the manuscript.  
40  
41  
42  
43  
44  
45  
46  
47  
48  
49

50  
51  
52 **Acknowledgments** The authors appreciate the support and efforts from people who  
53 will be included in this study.  
54  
55  
56  
57  
58  
59  
60

## References

1. Gill LH. Plantar fasciitis: diagnosis and conservative management. *J Am Acad Orthop Surg* 1997;5(2):109-17.
2. Rosenbaum AJ, DiPreata JA, Misener D. Plantar heel pain. *Med Clin North Am* 2014;98(2):339-52.
3. Neufeld SK, Cerrato R. Plantar fasciitis: evaluation and treatment. *J Am Acad Orthop Surg* 2008;16(6):338–46.
4. Cotchett MP, Landorf KB, Munteanu SE, Raspovic A. Effectiveness of trigger point dry needling for plantar heel pain: study protocol for a randomised controlled trial. *J Foot Ankle Res.* 2011; 4:5.
5. Akhbari B, Salavati M, Ezzati K, Mohammadi Rad S. The use of dry needling and myofascial meridians in a case of plantar fasciitis. *J Chiropr Med* 2014;13(1):43–8.
6. Cione JA, Cozzarelli J, Mullin CJ. A retrospective study of radiofrequency thermal lesioning for the treatment of neuritis of the medial calcaneal nerve and its terminal branches in chronic heel pain. *J Foot Ankle Surg* 2009; 48:142-47
7. Tracey I. Imaging pain. *Br J Anaesth* 2008; 101:32-9.
8. Thapa D, Ahuja V. Combination of diagnostic medial calcaneal nerve block followed by pulsed radiofrequency for plantar fascitis pain: A new modality. *Indian J Anaesth* 2014; 58:183-85.
9. Petraglia F, Ramazzina I, Costantino C. Plantar fasciitis in athletes: diagnostic and treatment strategies. A systematic review. *Muscles Ligaments Tendons J* 2017;7(1):107-18.
10. Uygur E, Aktaş B, Eceviz E, Yilmazo lu EG, Poyanli O. Preliminary Report on

- 1  
2  
3 the Role of Dry Needling Versus Corticosteroid Injection, an Effective Treatment  
4 Method for Plantar Fasciitis: A Randomized Controlled Trial. *J Foot Ankle Surg*  
5  
6 2019;58(2):301-5.  
7  
8  
9  
10 11. Osman AM, El-Hammady DH, Kotb MM. Pulsed Compared to Thermal  
11 Radiofrequency to the Medial Calcaneal Nerve for Management of Chronic  
12 Refractory Plantar Fasciitis: A Prospective Comparative Study. *Pain Physician*  
13 2016;19(8):E1181-7.  
14  
15  
16  
17  
18 12. Young CC, Rutherford DS, Niedfeldt MW. Treatment of plantar fasciitis. *Am Fam*  
19  
20  
21  
22  
23  
24  
25 13. Kumnerdee W, Pattapong N. Efficacy of electro-acupuncture in chronic plantar  
26  
27  
28  
29  
30  
31  
32  
33  
34  
35  
36  
37  
38  
39  
40  
41  
42  
43  
44  
45  
46  
47  
48  
49  
50  
51  
52  
53  
54  
55  
56  
57  
58  
59  
60
11. Osman AM, El-Hammady DH, Kotb MM. Pulsed Compared to Thermal Radiofrequency to the Medial Calcaneal Nerve for Management of Chronic Refractory Plantar Fasciitis: A Prospective Comparative Study. *Pain Physician* 2016;19(8):E1181-7.
  12. Young CC, Rutherford DS, Niedfeldt MW. Treatment of plantar fasciitis. *Am Fam Physician* 2001;63(3):467-74, 477-8.
  13. Kumnerdee W, Pattapong N. Efficacy of electro-acupuncture in chronic plantar fasciitis: a randomized controlled trial. *Am J Chin Med* 2012;40(6):1167–76.
  14. Cheuk DKL, Yeung WF, Chung KF, Wong V. Acupuncture for insomnia (Review). *Cochrane Database Syst Rev* 2012; 12;(9):CD005472.
  15. Wong JY, Rapson LM. Acupuncture in the management of pain of musculoskeletal and neurologic origin. *Phys Med Rehabil Clin N Am* 1999;10(3):531–45.
  16. Clark RJ, Tighe M: The effectiveness of acupuncture for plantar heel pain: a systematic review. *Acupunct Med* 2012;30(4):298–306.
  17. Thiagarajah AG: How effective is acupuncture for reducing pain due to plantar fasciitis? *Singapore Med J* 2017;58(2):92–7.
  18. Lundeberg T, Lund I, Sing A, Näslund J. Is Placebo Acupuncture What It Is Intended to Be? *Evid Based Complement Alternat Med* 2011;2011: 932407.
  19. Chan AW, Tetzlaff JM, Gøtzsche PC, et al. SPIRIT 2013 explanation and elaboration: guidance for protocols of clinical trials. *BMJ* 2013;346:e7586.



- 1  
2  
3 20. MacPherson H, Altman DG, Hammerschlag R, et al. Revised Standards for  
4  
5 Reporting Interventions in Clinical Trials of Acupuncture (STRICTA): extending  
6  
7 the CONSORT statement. *J Evid Based Med* 2010;3:140–55.  
8  
9  
10 21. Martin RL, Davenport TE, Reischl SF, et al. Heel pain-plantar fasciitis: revision  
11  
12 2014. *J Orthop Sports Phys Ther* 2014;44(11):A1–33  
13  
14 22. Wang W, Liu Y, Zhao J, et al. Electroacupuncture versus manual acupuncture in  
15  
16 the treatment of plantar heel pain syndrome: study protocol for an upcoming  
17  
18 randomised controlled trial. *BMJ Open* 2019;9(4):e026147.  
19  
20 23. Standardization Administration of the People’s Republic of China. GB/  
21  
22 T12346-2006, Nomenclature and Location of Acupuncture Points [S]. 2006.  
23  
24 24. Zhou K, Fang J, Wang X, et al. Characterization of de qi with electroacupuncture  
25  
26 at acupoints with different properties. *J Altern Complement Med*  
27  
28 2011;17(11):1007-13.  
29  
30 25. Fischer AA. Pressure algometry over normal muscles. Standard values, validity  
31  
32 and reproducibility of pressure threshold. *Pain* 1987;30(1):115-26.  
33  
34 26. Fong CM, Blackburn JT, Norcross MF, et al. Ankle-Dorsiflexion Range of  
35  
36 Motion and Landing Biomechanics. *J Athl Train* 2011;46(1):5-10  
37  
38 27. Martin R. Foot and Ankle Ability Measure (FAAM). [http://www.healthsciences.  
39  
40  
41  
42  
43  
44  
45  
46  
47  
48  
49  
50  
51  
52  
53  
54  
55  
56  
57  
58  
59  
60](http://www.healthsciences.duq.edu/pdf/FAAM12-051.pdf) duq. edu/ pdf/ FAAM12- 051. pdf (Accessed 23 May 2019).  
28. González-Sánchez M, Li GZ, Ruiz Muñoz M, et al. Foot and ankle ability  
measure to measure functional limitations in patients with foot and ankle disorders:  
a Chinese cross-cultural adaptation and validation. *Disabil Rehabil*  
2017;39(21):2182–9.

- 1  
2  
3 29. Zhang SP, Yip TP, Li QS. Acupuncture treatment for plantar fasciitis: a  
4  
5 randomized controlled trial with six months follow-up. *Evid Based Complement*  
6  
7 *Alternat Med* 2011; 2011:1–10.  
8  
9  
10 30. Monteagudo M, Maceira E, Garcia-Virto V, Canosa R. Chronic plantar fasciitis:  
11  
12 plantar fasciotomy versus gastrocnemius recession. *Int Orthop*.  
13  
14 2013;37(9):1845-50.  
15  
16  
17 31. Saban B, Masharawi Y. Pain threshold tests in patients with heel pain syndrome.  
18  
19 *Foot Ankle Int* 2016;37(7):730-6.  
20  
21  
22 32. Mahowald S, Legge BS, Grady JF. The correlation between plantar fascia  
23  
24 thickness and symptoms of plantar fasciitis. *J Am Podiatr Med Assoc*  
25  
26 2011;101(5):385-9.  
27  
28  
29  
30  
31  
32  
33  
34  
35  
36  
37  
38  
39  
40  
41  
42  
43  
44  
45  
46  
47  
48  
49  
50  
51  
52  
53  
54  
55  
56  
57  
58  
59  
60

1  
2  
3  
4 **Figure legends**

5  
6 Figure 1: Trial flow diagram

7  
8  
9 Figure 2: Study schedule

10  
11  
12  
13  
14  
15  
16  
17  
18  
19  
20  
21  
22  
23  
24  
25  
26  
27  
28  
29  
30  
31  
32  
33  
34  
35  
36  
37  
38  
39  
40  
41  
42  
43  
44  
45  
46  
47  
48  
49  
50  
51  
52  
53  
54  
55  
56  
57  
58  
59  
60

For peer review only

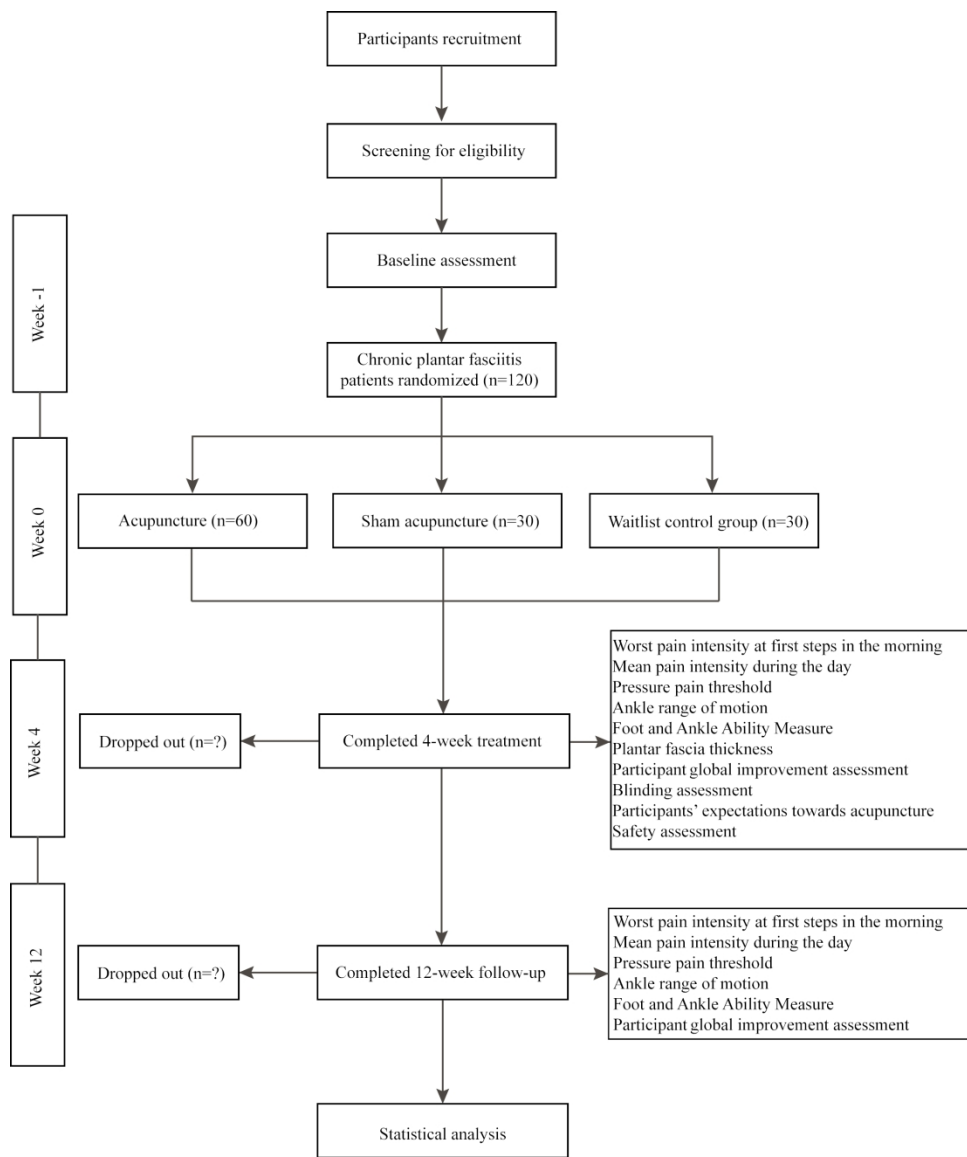

Figure 1. Trial flow diagram

Trial flow diagram

199x246mm (300 x 300 DPI)

| TIME POINT (W, week)                               | Study Period |            |             |           |        |
|----------------------------------------------------|--------------|------------|-------------|-----------|--------|
|                                                    | Baseline     | Allocation | Treatment   | Follow-up |        |
|                                                    |              |            | W 4±2d      | W 8±3d    | W16±3d |
| <b>Enrollment</b>                                  |              |            |             |           |        |
| Eligibility criteria                               | ×            |            |             |           |        |
| Demography characteristics                         | ×            |            |             |           |        |
| Disease history of chronic plantar fasciitis       | ×            |            |             |           |        |
| Eligibility screen                                 | ×            |            |             |           |        |
| Informed consent                                   | ×            |            |             |           |        |
| Allocation                                         |              | ×          |             |           |        |
| <b>Interventions</b>                               |              |            |             |           |        |
| Acupuncture                                        |              |            | ×(weeks1-4) |           |        |
| Sham acupuncture                                   |              |            | ×(weeks1-4) |           |        |
| Waitlist control (no treatment)                    |              |            | ×(weeks1-4) |           |        |
| <b>Assessments</b>                                 |              |            |             |           |        |
| Worst pain intensity at first steps in the morning | ×            |            | ×           | ×         | ×      |
| Mean pain intensity during the day                 | ×            |            | ×           | ×         | ×      |
| Pressure pain threshold                            | ×            |            | ×           | ×         | ×      |
| Ankle range of motion                              | ×            |            | ×           | ×         | ×      |
| Foot and Ankle Ability Measure                     | ×            |            | ×           | ×         | ×      |
| Plantar fascia thickness                           | ×            |            | ×           |           |        |
| Participant global improvement assessment          | ×            |            | ×           | ×         | ×      |
| Participant' expectations towards acupuncture      | ×            |            |             |           |        |
| Blinding assessment                                |              |            |             |           |        |
| Adverse events                                     |              |            | ×           |           |        |
| Safety assessment                                  |              |            | ×           | ×         | ×      |

Figure 2: study schedule

Study schedule

206x194mm (300 x 300 DPI)

Table 1

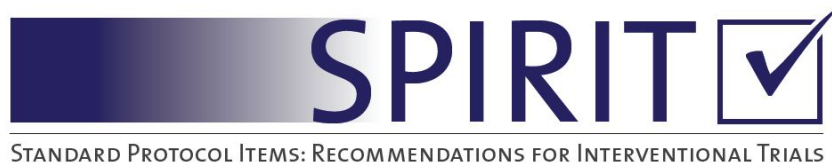

SPIRIT 2013 Checklist: Recommended items to address in a clinical trial protocol and related documents\*

| Section/item                      | Item No | Description                                                                                                                                                                                                                                                                              | Addressed on page number |
|-----------------------------------|---------|------------------------------------------------------------------------------------------------------------------------------------------------------------------------------------------------------------------------------------------------------------------------------------------|--------------------------|
| <b>Administrative information</b> |         |                                                                                                                                                                                                                                                                                          |                          |
| Title                             | 1       | Descriptive title identifying the study design, population, interventions, and, if applicable, trial acronym                                                                                                                                                                             | 1                        |
| Trial registration                | 2a      | Trial identifier and registry name. If not yet registered, name of intended registry                                                                                                                                                                                                     | 4                        |
|                                   | 2b      | All items from the World Health Organization Trial Registration Data Set                                                                                                                                                                                                                 | NA                       |
| Protocol version                  | 3       | Date and version identifier                                                                                                                                                                                                                                                              | 3                        |
| Funding                           | 4       | Sources and types of financial, material, and other support                                                                                                                                                                                                                              | 19                       |
| Roles and responsibilities        | 5a      | Names, affiliations, and roles of protocol contributors                                                                                                                                                                                                                                  | 1,19                     |
|                                   | 5b      | Name and contact information for the trial sponsor                                                                                                                                                                                                                                       | 1                        |
|                                   | 5c      | Role of study sponsor and funders, if any, in study design; collection, management, analysis, and interpretation of data; writing of the report; and the decision to submit the report for publication, including whether they will have ultimate authority over any of these activities | 19                       |
|                                   | 5d      | Composition, roles, and responsibilities of the coordinating centre, steering committee, endpoint adjudication committee, data management team, and other individuals or groups overseeing the trial, if applicable (see Item 21a for data monitoring committee)                         | NA                       |

## Introduction

|                          |    |                                                                                                                                                                                                           |     |
|--------------------------|----|-----------------------------------------------------------------------------------------------------------------------------------------------------------------------------------------------------------|-----|
| Background and rationale | 6a | Description of research question and justification for undertaking the trial, including summary of relevant studies (published and unpublished) examining benefits and harms for each intervention        | 4-5 |
|                          | 6b | Explanation for choice of comparators                                                                                                                                                                     | 4-5 |
| Objectives               | 7  | Specific objectives or hypotheses                                                                                                                                                                         | 5   |
| Trial design             | 8  | Description of trial design including type of trial (eg, parallel group, crossover, factorial, single group), allocation ratio, and framework (eg, superiority, equivalence, noninferiority, exploratory) | 5   |

## Methods: Participants, interventions, and outcomes

|                      |     |                                                                                                                                                                                                                                                                                                                                                                                |       |
|----------------------|-----|--------------------------------------------------------------------------------------------------------------------------------------------------------------------------------------------------------------------------------------------------------------------------------------------------------------------------------------------------------------------------------|-------|
| Study setting        | 9   | Description of study settings (eg, community clinic, academic hospital) and list of countries where data will be collected. Reference to where list of study sites can be obtained                                                                                                                                                                                             | 6     |
| Eligibility criteria | 10  | Inclusion and exclusion criteria for participants. If applicable, eligibility criteria for study centres and individuals who will perform the interventions (eg, surgeons, psychotherapists)                                                                                                                                                                                   | 7-8   |
| Interventions        | 11a | Interventions for each group with sufficient detail to allow replication, including how and when they will be administered                                                                                                                                                                                                                                                     | 8-10  |
|                      | 11b | Criteria for discontinuing or modifying allocated interventions for a given trial participant (eg, drug dose change in response to harms, participant request, or improving/worsening disease)                                                                                                                                                                                 | 14    |
|                      | 11c | Strategies to improve adherence to intervention protocols, and any procedures for monitoring adherence (eg, drug tablet return, laboratory tests)                                                                                                                                                                                                                              | 10    |
|                      | 11d | Relevant concomitant care and interventions that are permitted or prohibited during the trial                                                                                                                                                                                                                                                                                  | 10    |
| Outcomes             | 12  | Primary, secondary, and other outcomes, including the specific measurement variable (eg, systolic blood pressure), analysis metric (eg, change from baseline, final value, time to event), method of aggregation (eg, median, proportion), and time point for each outcome. Explanation of the clinical relevance of chosen efficacy and harm outcomes is strongly recommended | 11-13 |

|                      |    |                                                                                                                                                                                       |          |
|----------------------|----|---------------------------------------------------------------------------------------------------------------------------------------------------------------------------------------|----------|
| Participant timeline | 13 | Time schedule of enrolment, interventions (including any run-ins and washouts), assessments, and visits for participants. A schematic diagram is highly recommended (see Figure)      | Figure 2 |
| Sample size          | 14 | Estimated number of participants needed to achieve study objectives and how it was determined, including clinical and statistical assumptions supporting any sample size calculations | 14       |
| Recruitment          | 15 | Strategies for achieving adequate participant enrolment to reach target sample size                                                                                                   | 6        |

### Methods: Assignment of interventions (for controlled trials)

#### Allocation:

|                                  |     |                                                                                                                                                                                                                                                                                                                                                          |    |
|----------------------------------|-----|----------------------------------------------------------------------------------------------------------------------------------------------------------------------------------------------------------------------------------------------------------------------------------------------------------------------------------------------------------|----|
| Sequence generation              | 16a | Method of generating the allocation sequence (eg, computer-generated random numbers), and list of any factors for stratification. To reduce predictability of a random sequence, details of any planned restriction (eg, blocking) should be provided in a separate document that is unavailable to those who enrol participants or assign interventions | 6  |
| Allocation concealment mechanism | 16b | Mechanism of implementing the allocation sequence (eg, central telephone; sequentially numbered, opaque, sealed envelopes), describing any steps to conceal the sequence until interventions are assigned                                                                                                                                                | 6  |
| Implementation                   | 16c | Who will generate the allocation sequence, who will enrol participants, and who will assign participants to interventions                                                                                                                                                                                                                                | 6  |
| Blinding (masking)               | 17a | Who will be blinded after assignment to interventions (eg, trial participants, care providers, outcome assessors, data analysts), and how                                                                                                                                                                                                                | 6  |
|                                  | 17b | If blinded, circumstances under which unblinding is permissible, and procedure for revealing a participant's allocated intervention during the trial                                                                                                                                                                                                     | NA |

### Methods: Data collection, management, and analysis

|                         |     |                                                                                                                                                                                                                                                                                                                                                                                                              |   |
|-------------------------|-----|--------------------------------------------------------------------------------------------------------------------------------------------------------------------------------------------------------------------------------------------------------------------------------------------------------------------------------------------------------------------------------------------------------------|---|
| Data collection methods | 18a | Plans for assessment and collection of outcome, baseline, and other trial data, including any related processes to promote data quality (eg, duplicate measurements, training of assessors) and a description of study instruments (eg, questionnaires, laboratory tests) along with their reliability and validity, if known. Reference to where data collection forms can be found, if not in the protocol | 6 |
|-------------------------|-----|--------------------------------------------------------------------------------------------------------------------------------------------------------------------------------------------------------------------------------------------------------------------------------------------------------------------------------------------------------------------------------------------------------------|---|



|                     |     |                                                                                                                                                                                                                                                                   |       |
|---------------------|-----|-------------------------------------------------------------------------------------------------------------------------------------------------------------------------------------------------------------------------------------------------------------------|-------|
|                     | 18b | Plans to promote participant retention and complete follow-up, including list of any outcome data to be collected for participants who discontinue or deviate from intervention protocols                                                                         | 15    |
| Data management     | 19  | Plans for data entry, coding, security, and storage, including any related processes to promote data quality (eg, double data entry; range checks for data values). Reference to where details of data management procedures can be found, if not in the protocol | 15    |
| Statistical methods | 20a | Statistical methods for analysing primary and secondary outcomes. Reference to where other details of the statistical analysis plan can be found, if not in the protocol                                                                                          | 14-15 |
|                     | 20b | Methods for any additional analyses (eg, subgroup and adjusted analyses)                                                                                                                                                                                          | NA    |
|                     | 20c | Definition of analysis population relating to protocol non-adherence (eg, as randomised analysis), and any statistical methods to handle missing data (eg, multiple imputation)                                                                                   | 14-15 |

### Methods: Monitoring

|                 |     |                                                                                                                                                                                                                                                                                                                                       |       |
|-----------------|-----|---------------------------------------------------------------------------------------------------------------------------------------------------------------------------------------------------------------------------------------------------------------------------------------------------------------------------------------|-------|
| Data monitoring | 21a | Composition of data monitoring committee (DMC); summary of its role and reporting structure; statement of whether it is independent from the sponsor and competing interests; and reference to where further details about its charter can be found, if not in the protocol. Alternatively, an explanation of why a DMC is not needed | NA    |
|                 | 21b | Description of any interim analyses and stopping guidelines, including who will have access to these interim results and make the final decision to terminate the trial                                                                                                                                                               | 14    |
| Harms           | 22  | Plans for collecting, assessing, reporting, and managing solicited and spontaneously reported adverse events and other unintended effects of trial interventions or trial conduct                                                                                                                                                     | 13-14 |
| Auditing        | 23  | Frequency and procedures for auditing trial conduct, if any, and whether the process will be independent from investigators and the sponsor                                                                                                                                                                                           | 15    |

### Ethics and dissemination

|                          |    |                                                                                           |       |
|--------------------------|----|-------------------------------------------------------------------------------------------|-------|
| Research ethics approval | 24 | Plans for seeking research ethics committee/institutional review board (REC/IRB) approval | 16,19 |
|--------------------------|----|-------------------------------------------------------------------------------------------|-------|

|    |                   |     |                                                                                   |    |
|----|-------------------|-----|-----------------------------------------------------------------------------------|----|
| 1  |                   |     |                                                                                   |    |
| 2  |                   |     |                                                                                   |    |
| 3  |                   |     |                                                                                   |    |
| 4  |                   |     |                                                                                   |    |
| 5  | Protocol          | 25  | Plans for communicating important protocol modifications (eg, changes to          | 16 |
| 6  | amendments        |     | eligibility criteria, outcomes, analyses) to relevant parties (eg, investigators, |    |
| 7  |                   |     | REC/IRBs, trial participants, trial registries, journals, regulators)             |    |
| 8  |                   |     |                                                                                   |    |
| 9  | Consent or        | 26a | Who will obtain informed consent or assent from potential trial participants      | 6  |
| 10 | assent            |     | or authorised surrogates, and how (see Item 32)                                   |    |
| 11 |                   |     |                                                                                   |    |
| 12 |                   | 26b | Additional consent provisions for collection and use of participant data and      | NA |
| 13 |                   |     | biological specimens in ancillary studies, if applicable                          |    |
| 14 |                   |     |                                                                                   |    |
| 15 |                   |     |                                                                                   |    |
| 16 | Confidentiality   | 27  | How personal information about potential and enrolled participants will be        | 19 |
| 17 |                   |     | collected, shared, and maintained in order to protect confidentiality before,     |    |
| 18 |                   |     | during, and after the trial                                                       |    |
| 19 |                   |     |                                                                                   |    |
| 20 | Declaration of    | 28  | Financial and other competing interests for principal investigators for the       | 19 |
| 21 | interests         |     | overall trial and each study site                                                 |    |
| 22 |                   |     |                                                                                   |    |
| 23 |                   |     |                                                                                   |    |
| 24 | Access to         | 29  | Statement of who will have access to the final trial dataset, and disclosure      | 19 |
| 25 | data              |     | of contractual agreements that limit such access for investigators                |    |
| 26 |                   |     |                                                                                   |    |
| 27 | Ancillary and     | 30  | Provisions, if any, for ancillary and post-trial care, and for compensation to    | NA |
| 28 | post-trial care   |     | those who suffer harm from trial participation                                    |    |
| 29 |                   |     |                                                                                   |    |
| 30 | Dissemination     | 31a | Plans for investigators and sponsor to communicate trial results to               | 16 |
| 31 | policy            |     | participants, healthcare professionals, the public, and other relevant groups     |    |
| 32 |                   |     | (eg, via publication, reporting in results databases, or other data sharing       |    |
| 33 |                   |     | arrangements), including any publication restrictions                             |    |
| 34 |                   |     |                                                                                   |    |
| 35 |                   |     |                                                                                   |    |
| 36 |                   | 31b | Authorship eligibility guidelines and any intended use of professional            | 19 |
| 37 |                   |     | writers                                                                           |    |
| 38 |                   |     |                                                                                   |    |
| 39 |                   | 31c | Plans, if any, for granting public access to the full protocol, participant-level | NA |
| 40 |                   |     | dataset, and statistical code                                                     |    |
| 41 |                   |     |                                                                                   |    |
| 42 |                   |     |                                                                                   |    |
| 43 | <b>Appendices</b> |     |                                                                                   |    |
| 44 |                   |     |                                                                                   |    |
| 45 | Informed          | 32  | Model consent form and other related documentation given to participants          | NA |
| 46 | consent           |     | and authorised surrogates                                                         |    |
| 47 | materials         |     |                                                                                   |    |
| 48 |                   |     |                                                                                   |    |
| 49 | Biological        | 33  | Plans for collection, laboratory evaluation, and storage of biological            | NA |
| 50 | specimens         |     | specimens for genetic or molecular analysis in the current trial and for          |    |
| 51 |                   |     | future use in ancillary studies, if applicable                                    |    |
| 52 |                   |     |                                                                                   |    |
| 53 |                   |     |                                                                                   |    |
| 54 |                   |     |                                                                                   |    |
| 55 |                   |     |                                                                                   |    |
| 56 |                   |     |                                                                                   |    |
| 57 |                   |     |                                                                                   |    |
| 58 |                   |     |                                                                                   |    |
| 59 |                   |     |                                                                                   |    |
| 60 |                   |     |                                                                                   |    |

1  
2  
3  
4  
5 \*It is strongly recommended that this checklist be read in conjunction with the SPIRIT 2013 Explanation &  
6 Elaboration for important clarification on the items. Amendments to the protocol should be tracked and dated.  
7 The SPIRIT checklist is copyrighted by the SPIRIT Group under the Creative Commons "[Attribution-  
8 NonCommercial-NoDerivs 3.0 Unported](#)" license.  
9  
10  
11  
12  
13  
14  
15  
16  
17  
18  
19  
20  
21  
22  
23  
24  
25  
26  
27  
28  
29  
30  
31  
32  
33  
34  
35  
36  
37  
38  
39  
40  
41  
42  
43  
44  
45  
46  
47  
48  
49  
50  
51  
52  
53  
54  
55  
56  
57  
58  
59  
60

# BMJ Open

## Efficacy of acupuncture vs sham acupuncture or waitlist control for patients with chronic plantar fasciitis: study protocol for a 2-center randomized controlled trial

|                                 |                                                                                                                                                                                                                                                                                                                                                                                                                                                                                                                                                                                                                                                                                               |
|---------------------------------|-----------------------------------------------------------------------------------------------------------------------------------------------------------------------------------------------------------------------------------------------------------------------------------------------------------------------------------------------------------------------------------------------------------------------------------------------------------------------------------------------------------------------------------------------------------------------------------------------------------------------------------------------------------------------------------------------|
| Journal:                        | <i>BMJ Open</i>                                                                                                                                                                                                                                                                                                                                                                                                                                                                                                                                                                                                                                                                               |
| Manuscript ID                   | bmjopen-2020-036773.R1                                                                                                                                                                                                                                                                                                                                                                                                                                                                                                                                                                                                                                                                        |
| Article Type:                   | Protocol                                                                                                                                                                                                                                                                                                                                                                                                                                                                                                                                                                                                                                                                                      |
| Date Submitted by the Author:   | 05-Mar-2020                                                                                                                                                                                                                                                                                                                                                                                                                                                                                                                                                                                                                                                                                   |
| Complete List of Authors:       | Wang, Weiming; Guang'anmen Hospital, China Academy of Chinese Medical Sciences, Department of acupuncture<br>Liu, Sixing; Guizhou University of Traditional Chinese Medicine, School of Acupuncture-Moxibustion and Tuina,<br>Liu, Yan<br>Zang, Zhiwei; Yantai Hospital of Traditional Chinese Medicine, Department of Acupuncture<br>Zhang, Weina; Guang'anmen Hospital, China Academy of Chinese Medical Sciences, Department of Acupuncture<br>Li, Liang; Guang'anmen Hospital, China Academy of Chinese Medical Sciences, Department of Ultrasound<br>Liu, zhishun; Guang'an men Hospital Affiliated to China Academy of Chinese Medical Sciences, acupuncture and moxibustion department |
| <b>Primary Subject Heading</b>: | Medical management                                                                                                                                                                                                                                                                                                                                                                                                                                                                                                                                                                                                                                                                            |
| Secondary Subject Heading:      | Complementary medicine                                                                                                                                                                                                                                                                                                                                                                                                                                                                                                                                                                                                                                                                        |
| Keywords:                       | COMPLEMENTARY MEDICINE, PAIN MANAGEMENT, Clinical trials < THERAPEUTICS                                                                                                                                                                                                                                                                                                                                                                                                                                                                                                                                                                                                                       |
|                                 |                                                                                                                                                                                                                                                                                                                                                                                                                                                                                                                                                                                                                                                                                               |

SCHOLARONE™  
Manuscripts



I, the Submitting Author has the right to grant and does grant on behalf of all authors of the Work (as defined in the below author licence), an exclusive licence and/or a non-exclusive licence for contributions from authors who are: i) UK Crown employees; ii) where BMJ has agreed a CC-BY licence shall apply, and/or iii) in accordance with the terms applicable for US Federal Government officers or employees acting as part of their official duties; on a worldwide, perpetual, irrevocable, royalty-free basis to BMJ Publishing Group Ltd ("BMJ") its licensees and where the relevant Journal is co-owned by BMJ to the co-owners of the Journal, to publish the Work in this journal and any other BMJ products and to exploit all rights, as set out in our [licence](#).

The Submitting Author accepts and understands that any supply made under these terms is made by BMJ to the Submitting Author unless you are acting as an employee on behalf of your employer or a postgraduate student of an affiliated institution which is paying any applicable article publishing charge ("APC") for Open Access articles. Where the Submitting Author wishes to make the Work available on an Open Access basis (and intends to pay the relevant APC), the terms of reuse of such Open Access shall be governed by a Creative Commons licence – details of these licences and which [Creative Commons](#) licence will apply to this Work are set out in our licence referred to above.

Other than as permitted in any relevant BMJ Author's Self Archiving Policies, I confirm this Work has not been accepted for publication elsewhere, is not being considered for publication elsewhere and does not duplicate material already published. I confirm all authors consent to publication of this Work and authorise the granting of this licence.

1  
2  
3 1 Title page  
4  
5 2  
6  
7 3 Article title:  
8  
9

10 4 **Efficacy of acupuncture vs sham acupuncture or waitlist control for**  
11  
12  
13 5 **patients with chronic plantar fasciitis: study protocol for a 2-center**  
14  
15 6 **randomized controlled trial**

17 7 Weiming Wang, MD, PhD<sup>1\*</sup>; Sixing Liu, BS<sup>2\*</sup>; Yan Liu, MD<sup>3\*</sup>; Zhiwei Zang, MD<sup>4</sup>;  
18 8 Weina Zhang, BS<sup>1</sup>; Liang Li, MD<sup>5</sup>; Zhishun Liu, MD, PhD<sup>1†</sup>  
19  
20  
21  
22

23 10 1 Department of Acupuncture, Guang'anmen Hospital, China Academy of Chinese  
24 11 Medical Sciences, Beijing, China

25 12 2 School of Acupuncture–Moxibustion and Tuina, Guizhou University of Traditional  
26 13 Chinese Medicine, Guiyang, China

27 14 3 Key Laboratory of Chinese Internal Medicine of Ministry of Education,  
28 15 Dongzhimen Hospital, Beijing University of Chinese Medicine, Beijing, China

29 16 4 Department of Acupuncture, Yantai Hospital of Traditional Chinese Medicine,  
30 17 Yantai, China

31 18 5 Department of Ultrasound, Guang'anmen Hospital, China Academy of Chinese  
32 19 Medical Sciences, Beijing, China  
33  
34  
35  
36  
37  
38

39 20  
40 21 \*These authors contributed equally to this work.  
41  
42  
43  
44  
45  
46

47 22 †Corresponding author: Department of Acupuncture and Moxibustion, Guang' an  
48 23 Men Hospital, China Academy of Chinese Medical Sciences, No.5 Beixiang St.,  
49 24 Xicheng District, Beijing, China, Email: zhishunjournal@163.com.  
50  
51  
52

53 25 **Running title:** acupuncture for chronic plantar fasciitis  
54  
55  
56

57 27 **Word count: abstract 268; main text 4069.**  
58  
59  
60

1  
2  
3  
4 29 **Abstract**

5  
6 30 **Introduction:** Plantar fasciitis (PF) is reported to be the most common cause of  
7  
8  
9 31 plantar heel pain. Acupuncture has been used for patients experiencing PF, but  
10  
11  
12 32 evidence of the efficacy of acupuncture on PF is limited. The primary objective of this  
13  
14  
15 33 trial is to compare combined acupuncture and sham acupuncture (SA) versus waitlist  
16  
17  
18 34 control for improving the level of pain experienced by patients suffering from chronic  
19  
20 35 PF.

21  
22 36 **Methods and Analysis:** This will be a two-center, parallel-group, sham and  
23  
24  
25 37 no-treatment controlled, assessor-blinded randomized trial. We will randomly allocate  
26  
27  
28 38 120 participants with chronic PF to acupuncture, SA, and waitlist control groups at a  
29  
30  
31 39 ratio of 2:1:1. Participants in the acupuncture and SA groups will receive a 30-minute  
32  
33  
34 40 acupuncture or SA treatment for a total of 12 sessions over 4 weeks, with a 12-week  
35  
36  
37 41 follow-up. Participants in the waitlist control group will not undergo treatment for a  
38  
39  
40 42 period of 16 weeks but instead will have the option of 4 weeks (12 sessions) of  
41  
42  
43 43 acupuncture free of charge at the end of the follow-up period. The primary outcome  
44  
45  
46 44 will be the treatment response rate 4 weeks after randomization, assessed as a  
47  
48  
49 45 minimum of 50% improvement in the worst pain intensity during the first steps in the  
50  
51  
52 46 morning compared with the baseline. All analyses will be performed with a 2-sided *P*  
53  
54  
55 47 value of  $< 0.05$  considered significant following the intention-to-treat principle.

56  
57 48 **Ethics and Dissemination:** The study has been approved by the Ethical Committee  
58  
59 49 of the Guang'anmen Hospital, China Academy of Chinese Medical Sciences  
60  
50 (approval No: 2019-210-KY). The results will be disseminated through presentation

1  
2  
3  
4 51 at a peer-reviewed medical journal, the relevant conferences and scientific meetings.  
5

6 52 **Key words:** acupuncture; chronic plantar fasciitis; pain intensity; clinical trial  
7

8  
9 53 **Trial registration:** ClinicalTrials.gov identifier: NCT 04185259.  
10

11 54 **Strengths and limitations of this study:**  
12

13  
14 55 ▶ This study is the first randomized controlled trial comparing combined  
15  
16 56 acupuncture and sham acupuncture versus waitlist control for pain relief in  
17  
18 57 participants with chronic PF.  
19

20  
21  
22 58 ▶ The advantages to this study include sham acupuncture and waitlist control design,  
23  
24 59 objective measurements (i.e. PPT, PFT), strict quality control and evaluation of  
25  
26 60 participants' expectation regarding acupuncture.  
27

28  
29  
30 61 ▶ The 2:1:1 allocation ratio used in this trial could facilitate recruitment and enhance  
31  
32 62 patient adherence by allowing more patients to receive acupuncture.  
33

34  
35 63 ▶ Acupuncturists and participants in the waitlist control group will not be blinded,  
36  
37 64 which may cause bias.  
38

39  
40 65 ▶ A high dropout rate may exist in the waitlist group because participants expect to  
41  
42 66 receive acupuncture treatment when they join the trial.  
43  
44

45 67  
46

47  
48 68  
49  
50  
51  
52  
53  
54  
55  
56  
57  
58  
59  
60



## 69 **Background**

70 Plantar fasciitis (PF), which presents with heel pain and tenderness particularly at the  
71 plantar aspect of the calcaneal tuberosity <sup>1</sup> upon the initiation of weight bearing, is  
72 one of the most prevalent complaints encountered by foot and ankle specialists. It is  
73 reported that 1 in 10 people suffer from inferior heel pain within their lifetime <sup>2</sup> and  
74 this condition is attributed to PF in 80% of cases.<sup>3</sup> PF predominantly affects elderly  
75 and middle-aged individuals <sup>4</sup> and is more frequent in runners or those whose  
76 employment requires standing.<sup>5</sup> The exact etiology of PF is multifactorial and not  
77 completely understood. Physical-mechanical overload and micro tears within the  
78 fascia <sup>6</sup> could be involved in the development of PF, resulting in localized  
79 inflammation and degeneration of the proximal plantar aponeurosis.<sup>7</sup>

80 The available treatment options for PF mainly include non-operative treatments  
81 (e.g., plantar fascia and gastrocnemius soleus muscle stretching, heel cups, arch  
82 supports, night splints, shockwave therapy, nonsteroidal antiinflammatory drugs  
83 (NSAIDs), local corticosteroid injections), and operative management.<sup>8</sup> However, no  
84 consensus has been reached regarding the most beneficial treatment method for PF.<sup>9</sup>  
85 Although conservative treatment of PF is successful in the vast majority of cases <sup>10</sup>  
86 and many PF cases are self-limiting and eventually enter remission, it can take up to  
87 months or even years for patients to recover.<sup>11</sup> Moreover, approximately 10 to 20% of  
88 patients are recalcitrant to conventional treatments, resulting in foot pain and/or  
89 disabilities for years.<sup>12</sup>

90 Acupuncture, an integral part of traditional Chinese medicine (TCM), is a  
91 technique whereby the acupoints located on specific body areas are pierced with fine  
92 needles for therapeutic purposes based on the principles of TCM.<sup>13</sup> Acupuncture has  
93 been used in the management of PF and other musculoskeletal pain-related conditions

1  
2  
3 94 for thousands of years. Mechanistic studies have revealed that acupuncture can induce  
4  
5 95 an analgesic response via the release of neuropeptides (e.g., enkephalin, dynorphin,  
6  
7 96  $\beta$ -endorphin, and endomorphin).<sup>14</sup> Two recent systematic reviews <sup>15,16</sup> found that  
8  
9 97 acupuncture may reduce pain intensity and improve plantar function for patients with  
10  
11 98 PF. However, there were methodological problems with the small sample sizes, lack  
12  
13 99 of control with a placebo/waitlist group, or no adjustment for the confounding effects  
14  
15 100 of patients who received combination treatments in the design of the included  
16  
17 101 acupuncture literature. Therefore, the placebo effects of acupuncture and spontaneous  
18  
19 102 remission of PF cannot be excluded and the beneficial effects of acupuncture for PF  
20  
21 103 remain in need of further assessment.

22  
23  
24  
25  
26 104 We designed a randomized controlled trial to evaluate the efficacy of acupuncture,  
27  
28 105 compared with sham acupuncture (SA) or being on a waitlist control group, for  
29  
30 106 patients with chronic PF for >6 months. Given that clinical and experimental results  
31  
32 107 have shown that SA can induce a significant alleviation of pain similar to verum  
33  
34 108 acupuncture <sup>17</sup>due to non-specific effects (e.g., acupuncture expectations), the primary  
35  
36 109 hypothesis in this trial was that combined acupuncture and SA will result in larger  
37  
38 110 improvements in heel pain than no acupuncture treatment in patients with chronic PF.  
39  
40 111 The secondary hypothesis examined whether acupuncture can reduce heel pain  
41  
42 112 intensity more effectively than SA or no acupuncture.

## 43 113 **Methods and design**

### 44 114 **Study design**

45  
46  
47 115 This will be a two-center, parallel-group, sham and no-treatment controlled,  
48  
49 116 assessor-blinded randomized trial comprising three arms with a 2:1:1 allocation rate.  
50  
51 117 We will design the protocol in accordance with standard protocol items including the  
52  
53 118 Recommendations for Interventional Trials <sup>18</sup> and the Standards for Reporting  
54  
55  
56  
57  
58  
59  
60

1  
2  
3 119 Interventions in the Clinical Trials of Acupuncture<sup>19</sup> guidelines. The study flow chart  
4  
5  
6 120 and study schedule are shown in Figs. 1 and 2.

### 7 8 121 **Study setting and recruitment**

9  
10 122 This trial is planned to be conducted at Guang'anmen Hospital, China Academy of  
11  
12 123 Chinese Medical Sciences, and Yantai Hospital of Traditional Chinese Medicine from  
13  
14 124 March 2020 to March 2022. A total of 120 participants will be publicly recruited  
15  
16  
17 125 through the use of posters and hospital webs in the two participating hospitals. The  
18  
19 126 duration of the trial for each participant will be 17 weeks: 1-week baseline, 4-week  
20  
21  
22 127 treatment, and 12-week follow-up.

### 23 24 128 **Randomization and Blinding**

25  
26 129 The eligible participants who sign an informed consent form will complete a 1-week  
27  
28 130 baseline assessment (see Fig. 2) before randomization. Participants will be  
29  
30 131 randomized into the acupuncture group, SA group, or waitlist (no acupuncture) group  
31  
32  
33 132 at a ratio of 2:1:1 using simple randomization. Randomization will be generated with  
34  
35 133 the PROC PLAN in SAS 9.4 (SAS Institute Inc., Cary, NC, USA). Details of the  
36  
37 134 group allocation will be concealed on cards inside sealed opaque envelopes by the  
38  
39 135 staff member responsible for the allocation. A research coordinator, who will not be  
40  
41  
42 136 involved in the treatment and outcome assessments, will be responsible for contacting  
43  
44 137 participants and allocating them to their assigned group. Participants in the  
45  
46 138 acupuncture and SA groups, together with efficacy evaluators and data analysts will  
47  
48  
49 139 be blinded to the group assignments. Participants in the waitlist control group and  
50  
51  
52 140 acupuncturists will not be blinded.

### 53 54 141 **Participants**

55  
56 142 Participants with a diagnosis of PF by an orthopedist on clinical grounds will be  
57  
58 143 included in the study only if they meet all of the following inclusion criteria and do  
59  
60

1  
2  
3 144 not fulfill any of the exclusion criteria. Diagnosis of PF will be made according to the  
4  
5 145 guidelines described by the Orthopaedic Section of American Physical Therapy  
6  
7  
8 146 Association.<sup>20</sup> The following clinical findings will be used to diagnose PF: plantar  
9  
10 147 medial heel pain during the initial steps after a period of inactivity but also worse pain  
11  
12 148 following prolonged weight bearing, heel pain precipitated by a recent increase in  
13  
14 149 weight-bearing activity, physical examination findings (heel pain with palpation of  
15  
16 150 the proximal insertion of the plantar fascia, limited ankle range of motion,), abnormal  
17  
18 151 foot posture index, high body mass index, as well as a positive windlass test and  
19  
20 152 negative tarsal tunnel tests.  
21  
22  
23

24 153 **Inclusion criteria:**

- 25  
26 154 1. Age  $\geq 18$  years and  $\leq 75$  years;  
27  
28 155 2. History of plantar medial heel pain for at least 6 months before enrolment;  
29  
30 156 3. Reported an average worst pain intensity at first steps in the morning over the last  
31  
32 157 7 days of at least 50 mm on a 100-mm visual analog scale (VAS) before  
33  
34 158 enrolment;  
35  
36 159 4. Failure to respond to conservative treatment for  $\geq 1$  months, including any of the  
37  
38 160 following modalities: stretching exercises, nonsteroidal anti-inflammatory drugs,  
39  
40 161 shockwave therapy, dry needling and orthotics;  
41  
42 162 5. Ability to comply with the study protocol, understand the medical information  
43  
44 163 forms as well as having provided informed consent.  
45  
46  
47  
48

49 164 **Exclusion criteria:**

- 50  
51 165 1. History of calcaneus fracture, calcaneal bone tumor or cyst, plantar fascia rupture,  
52  
53 166 or having a significant foot deformity (clubfoot, pes cavus, or pes  
54  
55 167 calcaneovalgus);  
56  
57  
58  
59  
60

- 1  
2  
3 168 2. Previous injection (corticosteroid, platelet-rich plasma, lidocaine needling), or  
4  
5 169 radiation, or surgery to plantar fascia within 6 months preceding enrollment;  
6  
7  
8 170 3. Lumbosacral radiculopathy or peripheral neuropathy around the ankle joint such  
9  
10 171 as nerve entrapment tarsal tunnel syndrome or Achilles tendinopathy;  
11  
12 172 4. Systemic disorders like rheumatoid arthritis, gout, Reiter syndrome, type 1 or 2  
13  
14 173 diabetes mellitus, osteoporosis, spondyloarthritis, or osteomyelitis;  
15  
16  
17 174 5. Joint, bone, or skin infection in the affected foot;  
18  
19 175 6. Clinically significant cardiovascular disorder, severe hepatic/renal insufficiency or  
20  
21 176 coagulation disorder at baseline as determined by the investigator;  
22  
23  
24 177 7. Known phobia to acupuncture or receiving acupuncture treatment within 4 weeks  
25  
26 178 prior to enrollment.

## 179 **Interventions**

### 180 **Acupuncture group**

181 The acupuncture protocol was developed by the consensus of three experts based on  
182 the meridian theory of TCM and was used in our previous trial.<sup>21</sup> Licensed  
183 acupuncturists with more than 2 years of acupuncture experience will perform the  
184 treatment. We will apply needles to two Ashi points (the two most severe tender  
185 points in the most sensitive area over the anteromedial aspect of the heels, according  
186 to the participant's perceived pain upon palpation) as well as the Chengshan (BL57),  
187 Taixi (KI3), and Kunlun (BL60) acupoints in this trial. The position of the  
188 aforementioned acupoints will be based on the Nomenclature and location of  
189 acupuncture points <sup>22</sup> designated by the National Standard of the People's Republic of  
190 China (GB/T 12 346-2006). Sterile disposable stainless steel needles (Hwato brand,  
191 Suzhou Medical Appliance Factory, Suzhou, China; 0.3 mm × 40 mm) will be used.  
192 With the patient in a prone position, the local skin will be routinely sterilized,

1  
2  
3 193 followed by pasting a 10-mm diameter and 5-mm thick sterile adhesive pad (Hwato  
4  
5 194 brand, Suzhou Medical Appliance Factory, Suzhou, China) onto each selected  
6  
7 195 acupoint. Ashi points will be perpendicularly inserted through the pad to the plantar  
8  
9 196 fascia layer with a depth of approximately 15-20 mm depending on the location.  
10  
11 197 BL57, KI3, and BL60 will be punched perpendicularly 10-15 mm deep into the skin  
12  
13 198 through the pad. All needles except the Ashi points will be manually stimulated with  
14  
15 199 small, equal manipulations of lifting, thrusting, twirling, and rotating to achieve De qi  
16  
17 200 (a sensation including soreness, numbness, distention, and heaviness).<sup>23</sup> Needles will  
18  
19 201 be retained for 30 minutes per treatment. During each treatment, every needle will be  
20  
21 202 manipulated three times every 10 minutes.

### 26 203 **SA group**

28 204 In the SA group, sham Ashi (0.5 cun away from Ashi, one ‘cun’ is equivalent to the  
29  
30 205 greatest width of the individual patients’ thumb, ~1.5 cm), sham BL57 (0.5 cun lateral  
31  
32 206 to the true BL57 horizontally), sham KI3 (midway between the true KI3 and the  
33  
34 207 heel tendon) and sham BL60 (midway between the true BL60 and the heel tendon)  
35  
36 208 will be used. The treatment protocol will be similar to that of the acupuncture group.  
37  
38 209 The Hwato-brand disposable blunt-tipped needles (size 0.30 × 25 mm) will be  
39  
40 210 inserted at the sham points through the adhesive pads attached to the skin without skin  
41  
42 211 penetration. The needles will then be lifted, thrust, twirled, and rotated evenly three  
43  
44 212 times every 10 minutes. No specific De qi response will be elicited.

### 49 213 **Waitlist control group**

51 214 Participants will receive no treatment for their heel pain for a period of 16 weeks after  
52  
53 215 randomization, and subsequently have the option of 4 weeks (12 sessions) of  
54  
55 216 acupuncture free of charge at the end of the follow-up period.  
56  
57  
58  
59  
60

1  
2  
3 217 The intervention will last for 30 minutes in the acupuncture and SA groups, and  
4  
5 218 will be performed three times per week for a total of 12 sessions in four consecutive  
6  
7 219 weeks. If participants suffer pain bilaterally, the acupuncturists will treat both sides  
8  
9 220 and evaluate the more severe side. Participants in all groups will be treated and (or)  
10  
11 221 evaluated separately. Participants in all groups will be advised to use soft heel foot  
12  
13 222 wear, not to stand for a long time, and not to walk barefoot during the 17-week study  
14  
15 223 period.

#### 19 224 **Rescue medication**

21 225 Additional therapies for heel pain during the entire study period will be prohibited.  
22  
23 226 However, the investigator will be permitted to prescribe ibuprofen (sustained release  
24  
25 227 type, 300 mg/T, Tianjin Smith Kline & French Laboratories Ltd., Tianjin, China) as  
26  
27 228 rescue medication no more than 2 days per week up to the maximum daily dose if  
28  
29 229 unbearable heel pain occurs. Participants will be required not to take rescue  
30  
31 230 medication within 72 h before the baseline and outcome measurements. In the event  
32  
33 231 rescue medication needs to be taken after the baseline measurement, the participant  
34  
35 232 will postpone the next visit to the treatment center.

#### 39 233 **Outcome measures**

##### 41 234 **Primary outcome**

42  
43 235 The primary outcome used in this trial will be the proportion of participants with a  
44  
45 236 treatment response 4 weeks after randomization, defined as a minimum of 50%  
46  
47 237 improvement in the worst pain intensity during the first steps in the morning  
48  
49 238 compared with the baseline. The average worst pain intensity over the last 3 days will  
50  
51 239 be used for analysis in this trial. Pain intensity will be measured using a 0-100 VAS,  
52  
53 240 with 0 indicating no pain and 100 indicating maximal pain. Participants who must  
54  
55 241 resort to additional treatments other than rescue medication will be classified as  
56  
57  
58  
59  
60

1  
2  
3 242 nonresponders. In addition, the responder rate at weeks 8 and weeks 16 will also be  
4  
5 243 assessed.

6  
7  
8 244 **Secondary outcomes**

9  
10 245 The secondary outcomes are as follows:

- 11  
12 246 1. Changes in the VAS score for worst pain intensity during the first steps in the  
13  
14 247 morning from baseline to 4, 8, and 16 weeks after randomization;
- 15  
16  
17 248 2. Changes in the VAS score for mean pain intensity during the day from baseline to  
18  
19 249 4, 8, and 16 weeks after randomization;
- 20  
21 250 3. Changes in the pressure pain threshold (PPT) at the most painful area from  
22  
23 251 baseline to 4, 8, and 16 weeks after randomization. PPT is defined as the  
24  
25 252 minimum pressure detected when the sensation of pressure first changes to a  
26  
27 253 sensation of pain.<sup>24</sup> PPT will be tested with a pressure algometer (Fabrication  
28  
29 254 Enterprises, Inc., White Plains, NY; from 1 kg/cm<sup>2</sup> to 5 kg/cm<sup>2</sup>) using a metal  
30  
31 255 probe with a 0.5 cm<sup>2</sup> rubber disc by a trained researcher. PPT will be measured  
32  
33 256 when the participant is lying supine in a relaxed position with the affected foot  
34  
35 257 hanging over the edge of the bed. When measuring the PPT, the rubber disc will  
36  
37 258 be placed perpendicularly on the painful spot and pressure will be applied at a rate  
38  
39 259 of approximately 0.1 kg/cm<sup>2</sup>/s through the metal probe of the pressure algometer.  
40  
41 260 Participants will be informed to report when the initial pain sensation occurs, and  
42  
43 261 the readings of the algometer will be recorded. The score will be determined by  
44  
45 262 averaging three repeated measurements with 30 seconds between each trial. All  
46  
47 263 values below 1 kg/cm<sup>2</sup> will be reported as 0.5 kg/cm<sup>2</sup>.
- 48  
49 264 4. Changes in the ankle range of motion (AROM) from baseline to 4, 8, and 16  
50  
51 265 weeks after randomization: The examiner will measure the AROM including  
52  
53 266 dorsiflexion and plantar flexion in 2 positions (flexed knee and extended knee)
- 54  
55  
56  
57  
58  
59  
60



1  
2  
3 267 using a digital goniometer (Tangxia Electronic Instrument Factory, Dongguan,  
4  
5 268 from 0° to 360°). For the flexed-knee assessment, the participant will sit in a  
6  
7  
8 269 relaxed station with the popliteal space at the edge of the table and their knees  
9  
10 270 with 90° of flexion. For the extended-knee assessment, the participant will be  
11  
12 271 seated on a treatment table with the knees fully extended (0°) and the feet hanging  
13  
14 272 off the end of the table. The axis of the goniometer will be placed at the lateral  
15  
16  
17 273 malleolus. The stationary arm will be placed parallel to the fifth metatarsal and the  
18  
19 274 moving arm placed parallel to the center of the fibular head. The ankle will be  
20  
21  
22 275 passively moved from a neutral starting position into dorsiflexion and plantar  
23  
24 276 flexion until a firm end feel is elicited<sup>25</sup> and the readings of the goniometer will  
25  
26 277 be registered. The mean score of three trials with 10 seconds between each  
27  
28 278 examination will be calculated and used for analysis.

29  
30 279 5. Changes in the Foot and Ankle Ability Measure (FAAM) total score and subscale  
31  
32 280 scores from baseline to 4, 8, and 16 weeks after randomization: The FAAM is a  
33  
34 281 self-reported questionnaire concerning 21 activities of daily living (ADL) items  
35  
36 282 and eight sports subscale items.<sup>26</sup> Each item is scored on a 0-4 point Likert scale  
37  
38 283 anchored by 0 (unable to do) and 4 (no difficulty at all), with higher total scores  
39  
40 284 indicating a higher level of function. The FAAM has a maximum potential score  
41  
42 285 of 116 (84 ADL and 32 sport subscales). The obtained score (total, ADL, and  
43  
44 286 sport subscale scores) is divided by the maximum potential score and multiplied  
45  
46 287 by 100 to obtain a percentage. If the patient does not respond, the specific  
47  
48 288 question will be left blank and not be a part of the final value of the questionnaire.  
49  
50 289 In this trial, we will use the previously validated Chinese version of the FAAM.<sup>27</sup>  
51  
52  
53  
54 290 6. Change in plantar fascia thickness (PFT) from baseline to 4 weeks after  
55  
56 291 randomization: PFT will be measured at the thickest point closest to the calcaneal  
57  
58  
59  
60

1  
2  
3 292 insertion in its medial portion using ultrasound. The ultrasound scan will be  
4  
5 293 performed using an 8-12 MHz linear probe with the patient in the prone position  
6  
7  
8 294 at the baseline and at 4 weeks after randomization.  
9

10 295 7. Participant global assessment of improvement: Participants will be asked to rate  
11  
12 296 their global improvement using a 7-point scale. The improvement will be scaled  
13  
14 297 from 1 (complete recovery) to 7 (vastly worse), with 2 being obvious  
15  
16 298 improvement, 3 being a little improvement, 4 being no change, 5 being a little  
17  
18 299 worse, and 6 being obviously worse. The proportions of participants with different  
19  
20 300 degrees of improvement will be assessed at 4, 8, and 16 weeks after  
21  
22 301 randomization. Scales of participant global assessment of improvement with 7  
23  
24 302 response categories have been rated as relatively easy to use and show good  
25  
26 303 reliability and validity.<sup>28</sup>  
27  
28  
29

30 304 8. Participants' expectation towards acupuncture at baseline: At baseline,  
31  
32 305 participants in the acupuncture and SA groups will be asked the following  
33  
34 306 question: "Do you think acupuncture will be helpful to improve your chronic PF?"  
35  
36 307 Participant will choose one of the following answers: "Extremely helpful", "Very  
37  
38 308 helpful", "Helpful", "Not help at all", and "Unclear".  
39  
40  
41

42 309 9. The proportion of participants who have maintained blinding during treatment in  
43  
44 310 the acupuncture and SA groups: Participants' blindness to the mode of  
45  
46 311 acupuncture will be assessed five minutes after the end of any treatment in the  
47  
48 312 fourth week by asking the patients the following question: "Which of the two  
49  
50 313 acupuncture modalities do you think you received, acupuncture or SA?"  
51  
52 314 Participants will choose one of the following answers: "Acupuncture", "SA", or  
53  
54 315 "Unclear". Prior to the question, patients will be informed that they may have  
55  
56 316 received one of two modalities: acupuncture with a deeper insertion or SA with no  
57  
58  
59  
60

1  
2  
3 317 skin penetration.  
4

5 318 **Safety assessment**  
6

7  
8 319 The adverse events (AEs) during the entire study will be recorded and described as  
9  
10 320 acupuncture-related AEs and non-acupuncture-related AEs. Acupuncture-related AEs  
11  
12 321 include fainting, broken needle, unbearable pain during acupuncture (VAS  $\geq 8$ , using  
13  
14 322 VAS from 0 [no pain] to 10 [worst pain imaginable]), and other unintended signs or  
15  
16 323 symptoms after acupuncture (e.g., localized hematoma or infection, nausea, dizziness,  
17  
18 324 vomiting, headache, palpitations). Detailed information on AEs including the name,  
19  
20 325 onset, end date, intensity, correlation with acupuncture, and outcomes will be  
21  
22 326 documented in the case report form. Investigators will immediately report serious AEs  
23  
24 327 (eg, requiring hospitalization, causing disability or impaired ability to work) to the  
25  
26 328 Medical Ethics Committee of Guang'anmen Hospital, and stop the clinical trial until  
27  
28 329 further instruction is given.  
29  
30  
31

32  
33 330 **Sample size calculation**  
34

35 331 Based on the results of a previous study,<sup>12</sup> a sample size of 120 participants will be  
36  
37 332 enrolled to provide 80% power to detect a difference of 35% between the combined  
38  
39 333 acupuncture group and waiting-list group in the proportion of participants with  
40  
41 334 treatment response 4 weeks after randomization at a two-sided significance level of  
42  
43 335 0.05. The proportion of participants with treatment response after 4 weeks was  
44  
45 336 assumed to be roughly 12% for the waiting-list group,<sup>12</sup> with an anticipated 10% loss  
46  
47 337 to follow-up.  
48  
49

50  
51 338 **Statistical analysis**  
52

53 339 The null hypothesis is that the proportion of participants with treatment response 4  
54  
55 340 weeks after randomization will be the same for the combined acupuncture groups and  
56  
57 341 waiting-list group. Data will be presented as mean  $\pm$  standard deviation for  
58  
59  
60

1  
2  
3 342 quantitative variables and frequencies (number of cases), with relative frequencies  
4  
5 343 (percentages) for categorical variables. The primary outcome analysis will use the  
6  
7 344 Cochran-Mantel-Haenszel (CMH) test to compare the response rate between the  
8  
9 345 combined acupuncture groups and the waiting-list group. If the result of this analysis  
10  
11 346 is significant, hierarchical testing will be applied to the acupuncture group versus  
12  
13 347 waiting-list group, SA group versus waiting-list group, and acupuncture group versus  
14  
15 348 SA group. For normally distributed quantitative variables, a repeated-measures  
16  
17 349 analysis of variance (ANOVA) with multiple comparisons post-hoc test will be  
18  
19 350 performed using baseline as a co-variate when comparing more than two groups and  
20  
21 351 an unpaired T test when comparing two groups. For non-normally distributed  
22  
23 352 quantitative variables, the non-parametrical Kruskal-Wallis test and Mann-Whitney  
24  
25 353 test will be performed. For categorical variables, the Chi square ( $\chi^2$ ) test will be used.  
26  
27 354 Confidence intervals for the difference between treatments will be calculated at the  
28  
29 355 95% level. A two-tailed test will be applied for all available data, and a *P* value < 0.05  
30  
31 356 will be considered statistically significant. All analyses in this trial will be performed  
32  
33 357 using SPSS software V.20.0 (IBM SPSS Statistics; IBM Corp, Somers, NY) on the  
34  
35 358 basis of the intention-to-treat (ITT) population, which will include participants who  
36  
37 359 had been randomized. Missing data will be completed as the last value observed  
38  
39 360 before dropout. No adjustment will be made for multiple outcomes.

### 361 **Quality control**

362 To ensure the quality of the trial, all the relevant staff will be uniformly trained before  
363 the trial on the purpose and content of the trial (e.g., diagnosis of chronic PF,  
364 inclusion and exclusion criteria, intervention procedures, and outcome measures).  
365 Licensed acupuncturists with at least 2 years' acupuncture experience will perform  
366 the treatment. Throughout the trial, strict three-level monitoring will be conducted for

1  
2  
3 367 data quality control. Dropouts and withdrawals including the reasons will be recorded  
4  
5 368 during the trial. Paper-based study data will be stored in locked file cabinets under the  
6  
7 369 management of the investigators. Electronic records will be stored in a Structured  
8  
9  
10 370 Query Language (SQL) server database on a limited access, secure server maintained  
11  
12 371 by the Guang'anmen Hospital, China Academy of Chinese Medical Sciences.

### 14 372 **Patient and public involvement**

16  
17 373 The research question of whether combined acupuncture and SA will result in larger  
18  
19 374 improvements in heel pain than no acupuncture treatment for patients with chronic PF  
20  
21 375 was first proposed by the investigator after encountering a patient who received SA  
22  
23 376 and reported a similar improvement in heel pain as another patient who received  
24  
25 377 routine acupuncture in the clinic. Patients were not involved in conceiving or  
26  
27 378 implementing the study.

### 30 379 **Ethics and dissemination**

32  
33 380 This trial will be conducted in accordance with the principles of the Declaration of  
34  
35 381 Helsinki. The study has been registered at the ClinicalTrials.gov (NCT04185259) and  
36  
37 382 approved by the Ethical Committee of the Guang'anmen Hospital, China Academy of  
38  
39 383 Chinese Medical Sciences (approval No: 2019-210-KY). All participants must sign  
40  
41 384 the informed consent form prior to randomization, and they will be permitted to  
42  
43 385 withdraw at any time during the trial, with or without reasons being provided. Any  
44  
45 386 amendment or other change of the protocol will need to be approved by the Ethical  
46  
47 387 Committee of the Guang'anmen Hospital, China Academy of Chinese Medical  
48  
49 388 Science, and agreed to by the co-researchers.

51  
52  
53 389 Following analysis of the data, the findings of this study will be submitted for  
54  
55 390 publication in a peer-reviewed medical journal. The results will also be disseminated  
56  
57 391 through presentation at the relevant conferences and scientific meetings.  
58  
59  
60

1  
2  
3 392 **Discussion**  
4

5 393 Although several reviews and RCTs<sup>15,16,12,29</sup> have been published that focus on  
6  
7 394 acupuncture for PF, owing to the lack of a placebo control, non-specific physiology  
8  
9 395 effects of needling and spontaneous remission of PF cannot be excluded. To date, this  
10  
11 396 is the first randomized trial with three parallel arms, assessing whether combined  
12  
13 397 acupuncture and SA compared to no treatment control produce a significant reduction  
14  
15 398 in pain intensity in chronic PF. We anticipate that this study will determine the  
16  
17 399 efficacy of acupuncture for patients with chronic PF, and improve the care of these  
18  
19 400 patients in the clinic.  
20  
21  
22  
23

24 401 Though most PF patients will achieve significant improvement in symptoms  
25  
26 402 within 1 year regardless of treatment,<sup>30</sup> many will seek treatment before then. Patients  
27  
28 403 often choose other treatment options when they cannot obtain a satisfactory outcome  
29  
30 404 from conservative treatment (e.g., muscle stretching, heel cups, arch supports, night  
31  
32 405 splints, shockwave therapy, NSAIDs). In this trial, we recruited only chronic  
33  
34 406 participants who had failed to respond to conservative treatment prior to participation.  
35  
36 407 The results can be generalized to patients experiencing chronic refractory PF.  
37  
38  
39

40 408 In this study, pain intensity measured with VAS during the first steps in the  
41  
42 409 morning will be used as the primary outcome. This variable has been used in previous  
43  
44 410 trials<sup>12,21</sup> and is a meaningful subject outcome measure for the assessment of PF  
45  
46 411 improvement. In addition, we will also use PPT and PFT as objective secondary  
47  
48 412 outcomes. PPT is an essential evaluation tool for patients suffering from many  
49  
50 413 musculoskeletal disorders including PF and provides a reliable process for measuring  
51  
52 414 participants' responses to mechanical stimuli.<sup>31</sup> Compared to normal asymptomatic  
53  
54 415 patients, patients with PF often exhibit a thickened plantar fascia on ultrasound.<sup>32</sup>  
55  
56  
57  
58  
59  
60

1  
2  
3 416 Therefore, a PFT evaluation would provide information to detect the anatomical  
4  
5 417 changes that occur in the plantar fascia after acupuncture.  
6  
7

8 418 The strengths of this study include a sham control (non-penetrating at  
9  
10 419 non-acupuncture point) and waitlist control design, objective measurements (i.e. PPT,  
11  
12 420 PFT), strict quality control, and evaluation of the participants' expectations regarding  
13  
14 421 acupuncture. Several limitations to this trial need to be acknowledged. First, it will be  
15  
16 422 impossible to blind the acupuncturists and participants in the waitlist control group,  
17  
18 423 which is a general problem in non-pharmacological interventional trials and can cause  
19  
20 424 bias. Second, a high dropout rate may exist in the waitlist group because participants  
21  
22 425 expect to receive acupuncture treatment when they join the trial. Third, the follow-up  
23  
24 426 period will not exceed 12 weeks, which will not allow for detection of the long-term  
25  
26 427 effects of acupuncture for chronic PF. Fourth, our approach will enable us to draw  
27  
28 428 conclusions about the selected acupuncture points but not about individualized  
29  
30  
31  
32  
33 429 treatments.  
34  
35  
36  
37  
38  
39  
40  
41  
42  
43  
44  
45  
46  
47  
48  
49  
50  
51  
52  
53  
54  
55  
56  
57  
58  
59  
60

1  
2  
3 430  
4

5 431 **Ethical Approval and Consent to participate** The study has received approval from  
6  
7 432 the Institutional Review Boards of Guang'anmen Hospital in China (approval NO.  
8  
9 433 2019-210-KY, TEL +86-10-88001552), and all investigators complied with the  
10  
11  
12 434 Helsinki Declaration.

13  
14 435 **Consent for publication** Not applicable.

15  
16 436 **Availability of data and materials** Not applicable.

17  
18  
19 437 **Competing interests** The authors declare that they have no competing interests.

20  
21 438 **Funding** This RCT is funded by China Academy of Chinese Medical Sciences (Grant  
22  
23 439 No. ZZ13-YQ-019). The funding agency has no role in the design of the study; data  
24  
25 440 collection, management, analysis, and interpretation of the data; preparation, review,  
26  
27 441 or approval of the manuscript.  
28  
29

30  
31 442

32  
33 443 **Authors' contributions** Weiming Wang and Zhishun Liu conceived the idea and  
34  
35 444 designed this trial. Weiming Wang, Zhiwei Zang and Zhishun Liu developed the  
36  
37 445 acupuncture protocol to this article. Weina Zhang, Zhiwei Zang, Sixing Liu and Liang  
38  
39 446 Li will be responsible for the recruitment, acupuncture, and assessment respectively.  
40  
41 447 Yan Liu will be responsible for statistical analysis. This manuscript was drafted by  
42  
43 448 Weiming Wang and Sixing Liu, and was revised by Yan Liu and Zhishun Liu. All  
44  
45 449 authors read and approved the final draft of the manuscript.  
46  
47  
48

49  
50  
51 450

52  
53  
54 451 **Acknowledgments** The authors appreciate the support and efforts from people who  
55  
56 452 will be included in this study.  
57  
58  
59  
60



1  
2  
3  
4  
5  
6  
7  
8  
9  
10  
11  
12  
13  
14  
15  
16  
17  
18  
19  
20  
21  
22  
23  
24  
25  
26  
27  
28  
29  
30  
31  
32  
33  
34  
35  
36  
37  
38  
39  
40  
41  
42  
43  
44  
45  
46  
47  
48  
49  
50  
51  
52  
53  
54  
55  
56  
57  
58  
59  
60

453

454 **References**

- 455 1. Gill LH. Plantar fasciitis: diagnosis and conservative management. *J Am Acad*  
456 *Orthop Surg* 1997;5(2):109-17.
- 457 2. Rosenbaum AJ, DiPreata JA, Misener D. Plantar heel pain. *Med Clin North Am*  
458 2014;98(2):339-52.
- 459 3. Neufeld SK, Cerrato R. Plantar fasciitis: evaluation and treatment. *J Am Acad*  
460 *Orthop Surg* 2008;16(6):338–46.
- 461 4. Cotchett MP, Landorf KB, Munteanu SE, Raspovic A. Effectiveness of trigger  
462 point dry needling for plantar heel pain: study protocol for a randomised  
463 controlled trial. *J Foot Ankle Res.* 2011; 4:5.
- 464 5. Akhbari B, Salavati M, Ezzati K, Mohammadi Rad S. The use of dry needling and  
465 myofascial meridians in a case of plantar fasciitis. *J Chiropr Med*  
466 2014;13(1):43–8.
- 467 6. Cione JA, Cozzarelli J, Mullin CJ. A retrospective study of radiofrequency ther-  
468 mal lesioning for the treatment of neuritis of the medial calcaneal nerve and its  
469 terminal branches in chronic heel pain. *J Foot Ankle Surg* 2009; 48:142-47
- 470 7. Thapa D, Ahuja V. Combination of diagnostic medial calcaneal nerve block  
471 followed by pulsed radiofrequency for plantar fascitis pain: A new modality.  
472 *Indian J Anaesth* 2014; 58:183-85.
- 473 8. Petraglia F, Ramazzina I, Costantino C. Plantar fasciitis in athletes: diagnostic and  
474 treatment strategies. A systematic review. *Muscles Ligaments Tendons J*  
475 2017;7(1):107-18.
- 476 9. Uygur E, Aktaş B, Eceviz E, Yilmazo lu EG, Poyanli O. Preliminary Report on  
477 the Role of Dry Needling Versus Corticosteroid Injection, an Effective Treatment

- 1  
2  
3 478 Method for Plantar Fasciitis: A Randomized Controlled Trial. *J Foot Ankle Surg*  
4  
5 479 2019;58(2):301-5.  
6  
7  
8 480 10. Osman AM, El-Hammady DH, Kotb MM. Pulsed Compared to Thermal  
9  
10 481 Radiofrequency to the Medial Calcaneal Nerve for Management of Chronic  
11  
12 482 Refractory Plantar Fasciitis: A Prospective Comparative Study. *Pain Physician*  
13  
14 483 2016;19(8):E1181-7.  
15  
16  
17 484 11. Young CC, Rutherford DS, Niedfeldt MW. Treatment of plantar fasciitis. *Am Fam*  
18  
19 485 *Physician* 2001;63(3):467-74, 477-8.  
20  
21  
22 486 12. Kumnerdee W, Pattapong N. Efficacy of electro-acupuncture in chronic plantar  
23  
24 487 fasciitis: a randomized controlled trial. *Am J Chin Med* 2012;40(6):1167–76.  
25  
26  
27 488 13. Cheuk DKL, Yeung WF, Chung KF, Wong V. Acupuncture for insomnia  
28  
29 489 (Review). *Cochrane Database Syst Rev* 2012; 12;(9):CD005472.  
30  
31 490 14. Wong JY, Rapson LM. Acupuncture in the management of pain of  
32  
33 491 musculoskeletal and neurologic origin. *Phys Med Rehabil Clin N Am*  
34  
35 492 1999;10(3):531–45.  
36  
37  
38 493 15. Clark RJ, Tighe M: The effectiveness of acupuncture for plantar heel pain: a  
39  
40 494 systematic review. *Acupunct Med* 2012;30(4):298–306.  
41  
42  
43 495 16. Thiagarajah AG: How effective is acupuncture for reducing pain due to plantar  
44  
45 496 fasciitis? *Singapore Med J* 2017;58(2):92–7.  
46  
47  
48 497 17. Lundeberg T, Lund I, Sing A, Näslund J. Is Placebo Acupuncture What It Is  
49  
50 498 Intended to Be? *Evid Based Complement Alternat Med* 2011;2011: 932407.  
51  
52 499 18. Chan AW, Tetzlaff JM, Gøtzsche PC, et al. SPIRIT 2013 explanation and  
53  
54 500 elaboration: guidance for protocols of clinical trials. *BMJ* 2013;346:e7586.  
55  
56  
57  
58  
59  
60

1  
2  
3  
4  
5  
6  
7  
8  
9  
10  
11  
12  
13  
14  
15  
16  
17  
18  
19  
20  
21  
22  
23  
24  
25  
26  
27  
28  
29  
30  
31  
32  
33  
34  
35  
36  
37  
38  
39  
40  
41  
42  
43  
44  
45  
46  
47  
48  
49  
50  
51  
52  
53  
54  
55  
56  
57  
58  
59  
60

- 501 19. MacPherson H, Altman DG, Hammerschlag R, et al. Revised Standards for  
502 Reporting Interventions in Clinical Trials of Acupuncture (STRICTA): extending  
503 the CONSORT statement. *J Evid Based Med* 2010;3:140–55.
- 504 20. Martin RL, Davenport TE, Reischl SF, et al. Heel pain-plantar fasciitis: revision  
505 2014. *J Orthop Sports Phys Ther* 2014;44(11):A1–33
- 506 21. Wang W, Liu Y, Zhao J, et al. Electroacupuncture versus manual acupuncture in  
507 the treatment of plantar heel pain syndrome: study protocol for an upcoming  
508 randomised controlled trial. *BMJ Open* 2019;9(4):e026147.
- 509 22. Standardization Administration of the People’s Republic of China. GB/  
510 T12346-2006, Nomenclature and Location of Acupuncture Points [S]. 2006.
- 511 23. Zhou K, Fang J, Wang X, et al. Characterization of de qi with electroacupuncture  
512 at acupoints with different properties. *J Altern Complement Med*  
513 2011;17(11):1007-13.
- 514 24. Fischer AA. Pressure algometry over normal muscles. Standard values, validity  
515 and reproducibility of pressure threshold. *Pain* 1987;30(1):115-26.
- 516 25. Fong CM, Blackburn JT, Norcross MF, et al. Ankle-Dorsiflexion Range of  
517 Motion and Landing Biomechanics. *J Athl Train* 2011;46(1):5-10
- 518 26. Martin R. Foot and Ankle Ability Measure (FAAM). <http://www.healthsciences.duq.edu/pdf/FAAM12-051.pdf> (Accessed 23 May 2019).
- 520 27. González-Sánchez M, Li GZ, Ruiz Muñoz M, et al. Foot and ankle ability  
521 measure to measure functional limitations in patients with foot and ankle disorders:  
522 a Chinese cross-cultural adaptation and validation. *Disabil Rehabil*  
523 2017;39(21):2182–9.

- 1  
2  
3 524 28. Preston CC, Colman AM. Optimal number of response categories in rating scales:  
4  
5 525 reliability, validity, discriminating power, and respondent preferences. *Acta*  
6  
7 526 *Psychol (Amst)* 2000;104(1):1–15.
- 8  
9  
10 527 29. Zhang SP, Yip TP, Li QS. Acupuncture treatment for plantar fasciitis: a  
11  
12 528 randomized controlled trial with six months follow-up. *Evid Based Complement*  
13  
14 529 *Alternat Med* 2011; 2011:1–10.
- 15  
16  
17 530 30. Monteagudo M, Maceira E, Garcia-Virto V, Canosa R. Chronic plantar fasciitis:  
18  
19 531 plantar fasciotomy versus gastrocnemius recession. *Int Orthop*.  
20  
21 532 2013;37(9):1845-50.
- 22  
23  
24 533 31. Saban B, Masharawi Y. Pain threshold tests in patients with heel pain syndrome.  
25  
26 534 *Foot Ankle Int* 2016;37(7):730-6.
- 27  
28  
29 535 32. Mahowald S, Legge BS, Grady JF. The correlation between plantar fascia  
30  
31 536 thickness and symptoms of plantar fasciitis. *J Am Podiatr Med Assoc*  
32  
33 537 2011;101(5):385-9.
- 34  
35  
36  
37  
38  
39  
40  
41  
42  
43  
44  
45  
46  
47  
48  
49  
50  
51  
52  
53  
54  
55  
56  
57  
58  
59  
60

1  
2  
3  
4  
5  
6  
7  
8  
9  
10  
11  
12  
13  
14  
15  
16  
17  
18  
19  
20  
21  
22  
23  
24  
25  
26  
27  
28  
29  
30  
31  
32  
33  
34  
35  
36  
37  
38  
39  
40  
41  
42  
43  
44  
45  
46  
47  
48  
49  
50  
51  
52  
53  
54  
55  
56  
57  
58  
59  
60

**Figure legends**

Figure 1: Trial flow diagram

Figure 2: Study schedule

For peer review only

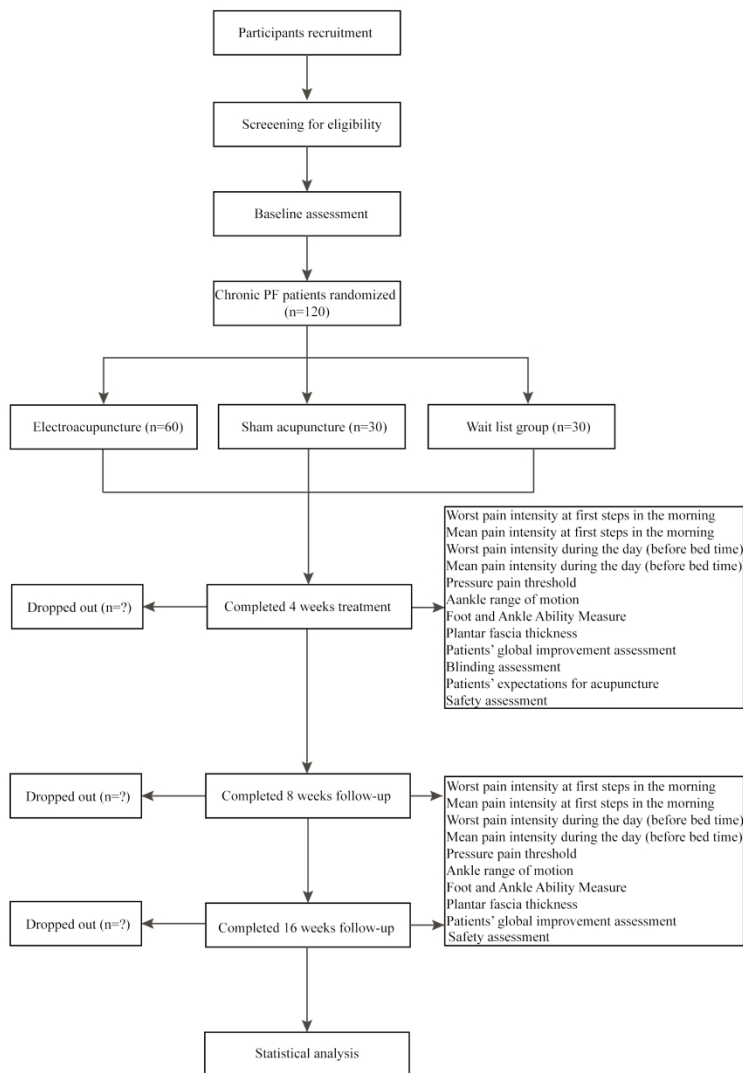

Figure 1. Trial flow diagram

Trial flow diagram

234x301mm (300 x 300 DPI)

| TIME POINT (W, week)                               | Study Period |            |             |           |        |
|----------------------------------------------------|--------------|------------|-------------|-----------|--------|
|                                                    | Baseline     | Allocation | Treatment   | Follow-up |        |
|                                                    |              |            | W 4±2d      | W 8±3d    | W16±3d |
| <b>Enrollment</b>                                  |              |            |             |           |        |
| Eligibility criteria                               | ×            |            |             |           |        |
| Demography characteristics                         | ×            |            |             |           |        |
| Disease history of chronic plantar fasciitis       | ×            |            |             |           |        |
| Eligibility screen                                 | ×            |            |             |           |        |
| Informed consent                                   | ×            |            |             |           |        |
| Allocation                                         |              | ×          |             |           |        |
| <b>Interventions</b>                               |              |            |             |           |        |
| Acupuncture                                        |              |            | ×(weeks1-4) |           |        |
| Sham acupuncture                                   |              |            | ×(weeks1-4) |           |        |
| Waitlist control (no treatment)                    |              |            | ×(weeks1-4) |           |        |
| <b>Assessments</b>                                 |              |            |             |           |        |
| Worst pain intensity at first steps in the morning | ×            |            | ×           | ×         | ×      |
| Mean pain intensity during the day                 | ×            |            | ×           | ×         | ×      |
| Pressure pain threshold                            | ×            |            | ×           | ×         | ×      |
| Ankle range of motion                              | ×            |            | ×           | ×         | ×      |
| Foot and Ankle Ability Measure                     | ×            |            | ×           | ×         | ×      |
| Plantar fascia thickness                           | ×            |            | ×           |           |        |
| Participant global improvement assessment          | ×            |            | ×           | ×         | ×      |
| Participant' expectations towards acupuncture      | ×            |            |             |           |        |
| Blinding assessment                                |              |            |             |           |        |
| Adverse events                                     |              |            | ×           | ×         | ×      |
| Safety assessment                                  |              |            | ×           | ×         | ×      |

Figure 2: study schedule

Study schedule

206x194mm (300 x 300 DPI)

Table 1



SPIRIT 2013 Checklist: Recommended items to address in a clinical trial protocol and related documents\*

| Section/item                      | Item No | Description                                                                                                                                                                                                                                                                              | Addressed on page number |
|-----------------------------------|---------|------------------------------------------------------------------------------------------------------------------------------------------------------------------------------------------------------------------------------------------------------------------------------------------|--------------------------|
| <b>Administrative information</b> |         |                                                                                                                                                                                                                                                                                          |                          |
| Title                             | 1       | Descriptive title identifying the study design, population, interventions, and, if applicable, trial acronym                                                                                                                                                                             | 1                        |
| Trial registration                | 2a      | Trial identifier and registry name. If not yet registered, name of intended registry                                                                                                                                                                                                     | 4                        |
|                                   | 2b      | All items from the World Health Organization Trial Registration Data Set                                                                                                                                                                                                                 | NA                       |
| Protocol version                  | 3       | Date and version identifier                                                                                                                                                                                                                                                              | 3                        |
| Funding                           | 4       | Sources and types of financial, material, and other support                                                                                                                                                                                                                              | 19                       |
| Roles and responsibilities        | 5a      | Names, affiliations, and roles of protocol contributors                                                                                                                                                                                                                                  | 1,19                     |
|                                   | 5b      | Name and contact information for the trial sponsor                                                                                                                                                                                                                                       | 1                        |
|                                   | 5c      | Role of study sponsor and funders, if any, in study design; collection, management, analysis, and interpretation of data; writing of the report; and the decision to submit the report for publication, including whether they will have ultimate authority over any of these activities | 19                       |
|                                   | 5d      | Composition, roles, and responsibilities of the coordinating centre, steering committee, endpoint adjudication committee, data management team, and other individuals or groups overseeing the trial, if applicable (see Item 21a for data monitoring committee)                         | NA                       |



## Introduction

|                          |    |                                                                                                                                                                                                           |     |
|--------------------------|----|-----------------------------------------------------------------------------------------------------------------------------------------------------------------------------------------------------------|-----|
| Background and rationale | 6a | Description of research question and justification for undertaking the trial, including summary of relevant studies (published and unpublished) examining benefits and harms for each intervention        | 4-5 |
|                          | 6b | Explanation for choice of comparators                                                                                                                                                                     | 4-5 |
| Objectives               | 7  | Specific objectives or hypotheses                                                                                                                                                                         | 5   |
| Trial design             | 8  | Description of trial design including type of trial (eg, parallel group, crossover, factorial, single group), allocation ratio, and framework (eg, superiority, equivalence, noninferiority, exploratory) | 5   |

## Methods: Participants, interventions, and outcomes

|                      |     |                                                                                                                                                                                                                                                                                                                                                                                |       |
|----------------------|-----|--------------------------------------------------------------------------------------------------------------------------------------------------------------------------------------------------------------------------------------------------------------------------------------------------------------------------------------------------------------------------------|-------|
| Study setting        | 9   | Description of study settings (eg, community clinic, academic hospital) and list of countries where data will be collected. Reference to where list of study sites can be obtained                                                                                                                                                                                             | 6     |
| Eligibility criteria | 10  | Inclusion and exclusion criteria for participants. If applicable, eligibility criteria for study centres and individuals who will perform the interventions (eg, surgeons, psychotherapists)                                                                                                                                                                                   | 7-8   |
| Interventions        | 11a | Interventions for each group with sufficient detail to allow replication, including how and when they will be administered                                                                                                                                                                                                                                                     | 8-10  |
|                      | 11b | Criteria for discontinuing or modifying allocated interventions for a given trial participant (eg, drug dose change in response to harms, participant request, or improving/worsening disease)                                                                                                                                                                                 | 14    |
|                      | 11c | Strategies to improve adherence to intervention protocols, and any procedures for monitoring adherence (eg, drug tablet return, laboratory tests)                                                                                                                                                                                                                              | 10    |
|                      | 11d | Relevant concomitant care and interventions that are permitted or prohibited during the trial                                                                                                                                                                                                                                                                                  | 10    |
| Outcomes             | 12  | Primary, secondary, and other outcomes, including the specific measurement variable (eg, systolic blood pressure), analysis metric (eg, change from baseline, final value, time to event), method of aggregation (eg, median, proportion), and time point for each outcome. Explanation of the clinical relevance of chosen efficacy and harm outcomes is strongly recommended | 11-13 |

|                      |    |                                                                                                                                                                                       |          |
|----------------------|----|---------------------------------------------------------------------------------------------------------------------------------------------------------------------------------------|----------|
| Participant timeline | 13 | Time schedule of enrolment, interventions (including any run-ins and washouts), assessments, and visits for participants. A schematic diagram is highly recommended (see Figure)      | Figure 2 |
| Sample size          | 14 | Estimated number of participants needed to achieve study objectives and how it was determined, including clinical and statistical assumptions supporting any sample size calculations | 14       |
| Recruitment          | 15 | Strategies for achieving adequate participant enrolment to reach target sample size                                                                                                   | 6        |

### Methods: Assignment of interventions (for controlled trials)

#### Allocation:

|                                  |     |                                                                                                                                                                                                                                                                                                                                                          |    |
|----------------------------------|-----|----------------------------------------------------------------------------------------------------------------------------------------------------------------------------------------------------------------------------------------------------------------------------------------------------------------------------------------------------------|----|
| Sequence generation              | 16a | Method of generating the allocation sequence (eg, computer-generated random numbers), and list of any factors for stratification. To reduce predictability of a random sequence, details of any planned restriction (eg, blocking) should be provided in a separate document that is unavailable to those who enrol participants or assign interventions | 6  |
| Allocation concealment mechanism | 16b | Mechanism of implementing the allocation sequence (eg, central telephone; sequentially numbered, opaque, sealed envelopes), describing any steps to conceal the sequence until interventions are assigned                                                                                                                                                | 6  |
| Implementation                   | 16c | Who will generate the allocation sequence, who will enrol participants, and who will assign participants to interventions                                                                                                                                                                                                                                | 6  |
| Blinding (masking)               | 17a | Who will be blinded after assignment to interventions (eg, trial participants, care providers, outcome assessors, data analysts), and how                                                                                                                                                                                                                | 6  |
|                                  | 17b | If blinded, circumstances under which unblinding is permissible, and procedure for revealing a participant's allocated intervention during the trial                                                                                                                                                                                                     | NA |

### Methods: Data collection, management, and analysis

|                         |     |                                                                                                                                                                                                                                                                                                                                                                                                              |   |
|-------------------------|-----|--------------------------------------------------------------------------------------------------------------------------------------------------------------------------------------------------------------------------------------------------------------------------------------------------------------------------------------------------------------------------------------------------------------|---|
| Data collection methods | 18a | Plans for assessment and collection of outcome, baseline, and other trial data, including any related processes to promote data quality (eg, duplicate measurements, training of assessors) and a description of study instruments (eg, questionnaires, laboratory tests) along with their reliability and validity, if known. Reference to where data collection forms can be found, if not in the protocol | 6 |
|-------------------------|-----|--------------------------------------------------------------------------------------------------------------------------------------------------------------------------------------------------------------------------------------------------------------------------------------------------------------------------------------------------------------------------------------------------------------|---|

|    |             |     |                                                                                  |
|----|-------------|-----|----------------------------------------------------------------------------------|
| 1  |             |     |                                                                                  |
| 2  |             |     |                                                                                  |
| 3  |             |     |                                                                                  |
| 4  |             |     |                                                                                  |
| 5  |             | 18b | Plans to promote participant retention and complete follow-up, including list 15 |
| 6  |             |     | of any outcome data to be collected for participants who discontinue or          |
| 7  |             |     | deviate from intervention protocols                                              |
| 8  |             |     |                                                                                  |
| 9  |             |     |                                                                                  |
| 10 | Data        | 19  | Plans for data entry, coding, security, and storage, including any related 15    |
| 11 | management  |     | processes to promote data quality (eg, double data entry; range checks for       |
| 12 |             |     | data values). Reference to where details of data management procedures           |
| 13 |             |     | can be found, if not in the protocol                                             |
| 14 |             |     |                                                                                  |
| 15 | Statistical | 20a | Statistical methods for analysing primary and secondary outcomes. 14-15          |
| 16 | methods     |     | Reference to where other details of the statistical analysis plan can be         |
| 17 |             |     | found, if not in the protocol                                                    |
| 18 |             |     |                                                                                  |
| 19 |             |     |                                                                                  |
| 20 |             | 20b | Methods for any additional analyses (eg, subgroup and adjusted analyses) NA      |
| 21 |             |     |                                                                                  |
| 22 |             | 20c | Definition of analysis population relating to protocol non-adherence (eg, as     |
| 23 |             |     | randomised analysis), and any statistical methods to handle missing data 14-15   |
| 24 |             |     | (eg, multiple imputation)                                                        |
| 25 |             |     |                                                                                  |
| 26 |             |     |                                                                                  |

## Methods: Monitoring

|    |            |     |                                                                                |
|----|------------|-----|--------------------------------------------------------------------------------|
| 27 |            |     |                                                                                |
| 28 |            |     |                                                                                |
| 29 | Data       | 21a | Composition of data monitoring committee (DMC); summary of its role and NA     |
| 30 | monitoring |     | reporting structure; statement of whether it is independent from the sponsor   |
| 31 |            |     | and competing interests; and reference to where further details about its      |
| 32 |            |     | charter can be found, if not in the protocol. Alternatively, an explanation of |
| 33 |            |     | why a DMC is not needed                                                        |
| 34 |            |     |                                                                                |
| 35 |            |     |                                                                                |
| 36 |            | 21b | Description of any interim analyses and stopping guidelines, including who 14  |
| 37 |            |     | will have access to these interim results and make the final decision to       |
| 38 |            |     | terminate the trial                                                            |
| 39 |            |     |                                                                                |
| 40 | Harms      | 22  | Plans for collecting, assessing, reporting, and managing solicited and 13-14   |
| 41 |            |     | spontaneously reported adverse events and other unintended effects of          |
| 42 |            |     | trial interventions or trial conduct                                           |
| 43 |            |     |                                                                                |
| 44 |            |     |                                                                                |
| 45 | Auditing   | 23  | Frequency and procedures for auditing trial conduct, if any, and whether 15    |
| 46 |            |     | the process will be independent from investigators and the sponsor             |
| 47 |            |     |                                                                                |

## Ethics and dissemination

|    |          |    |                                                                              |
|----|----------|----|------------------------------------------------------------------------------|
| 48 |          |    |                                                                              |
| 49 |          |    |                                                                              |
| 50 | Research | 24 | Plans for seeking research ethics committee/institutional review board 16,19 |
| 51 | ethics   |    | (REC/IRB) approval                                                           |
| 52 | approval |    |                                                                              |
| 53 |          |    |                                                                              |
| 54 |          |    |                                                                              |
| 55 |          |    |                                                                              |
| 56 |          |    |                                                                              |
| 57 |          |    |                                                                              |
| 58 |          |    |                                                                              |
| 59 |          |    |                                                                              |
| 60 |          |    |                                                                              |

|    |                   |     |                                                                                   |    |
|----|-------------------|-----|-----------------------------------------------------------------------------------|----|
| 1  |                   |     |                                                                                   |    |
| 2  |                   |     |                                                                                   |    |
| 3  |                   |     |                                                                                   |    |
| 4  |                   |     |                                                                                   |    |
| 5  | Protocol          | 25  | Plans for communicating important protocol modifications (eg, changes to          | 16 |
| 6  | amendments        |     | eligibility criteria, outcomes, analyses) to relevant parties (eg, investigators, |    |
| 7  |                   |     | REC/IRBs, trial participants, trial registries, journals, regulators)             |    |
| 8  |                   |     |                                                                                   |    |
| 9  | Consent or        | 26a | Who will obtain informed consent or assent from potential trial participants      | 6  |
| 10 | assent            |     | or authorised surrogates, and how (see Item 32)                                   |    |
| 11 |                   |     |                                                                                   |    |
| 12 |                   | 26b | Additional consent provisions for collection and use of participant data and      | NA |
| 13 |                   |     | biological specimens in ancillary studies, if applicable                          |    |
| 14 |                   |     |                                                                                   |    |
| 15 |                   |     |                                                                                   |    |
| 16 | Confidentiality   | 27  | How personal information about potential and enrolled participants will be        | 19 |
| 17 |                   |     | collected, shared, and maintained in order to protect confidentiality before,     |    |
| 18 |                   |     | during, and after the trial                                                       |    |
| 19 |                   |     |                                                                                   |    |
| 20 | Declaration of    | 28  | Financial and other competing interests for principal investigators for the       | 19 |
| 21 | interests         |     | overall trial and each study site                                                 |    |
| 22 |                   |     |                                                                                   |    |
| 23 |                   |     |                                                                                   |    |
| 24 | Access to         | 29  | Statement of who will have access to the final trial dataset, and disclosure      | 19 |
| 25 | data              |     | of contractual agreements that limit such access for investigators                |    |
| 26 |                   |     |                                                                                   |    |
| 27 | Ancillary and     | 30  | Provisions, if any, for ancillary and post-trial care, and for compensation to    | NA |
| 28 | post-trial care   |     | those who suffer harm from trial participation                                    |    |
| 29 |                   |     |                                                                                   |    |
| 30 | Dissemination     | 31a | Plans for investigators and sponsor to communicate trial results to               | 16 |
| 31 | policy            |     | participants, healthcare professionals, the public, and other relevant groups     |    |
| 32 |                   |     | (eg, via publication, reporting in results databases, or other data sharing       |    |
| 33 |                   |     | arrangements), including any publication restrictions                             |    |
| 34 |                   |     |                                                                                   |    |
| 35 |                   |     |                                                                                   |    |
| 36 |                   | 31b | Authorship eligibility guidelines and any intended use of professional            | 19 |
| 37 |                   |     | writers                                                                           |    |
| 38 |                   |     |                                                                                   |    |
| 39 |                   | 31c | Plans, if any, for granting public access to the full protocol, participant-level | NA |
| 40 |                   |     | dataset, and statistical code                                                     |    |
| 41 |                   |     |                                                                                   |    |
| 42 |                   |     |                                                                                   |    |
| 43 | <b>Appendices</b> |     |                                                                                   |    |
| 44 |                   |     |                                                                                   |    |
| 45 | Informed          | 32  | Model consent form and other related documentation given to participants          | NA |
| 46 | consent           |     | and authorised surrogates                                                         |    |
| 47 | materials         |     |                                                                                   |    |
| 48 |                   |     |                                                                                   |    |
| 49 | Biological        | 33  | Plans for collection, laboratory evaluation, and storage of biological            | NA |
| 50 | specimens         |     | specimens for genetic or molecular analysis in the current trial and for          |    |
| 51 |                   |     | future use in ancillary studies, if applicable                                    |    |
| 52 |                   |     |                                                                                   |    |
| 53 |                   |     |                                                                                   |    |
| 54 |                   |     |                                                                                   |    |
| 55 |                   |     |                                                                                   |    |
| 56 |                   |     |                                                                                   |    |
| 57 |                   |     |                                                                                   |    |
| 58 |                   |     |                                                                                   |    |
| 59 |                   |     |                                                                                   |    |
| 60 |                   |     |                                                                                   |    |

1  
2  
3  
4  
5 \*It is strongly recommended that this checklist be read in conjunction with the SPIRIT 2013 Explanation &  
6 Elaboration for important clarification on the items. Amendments to the protocol should be tracked and dated.  
7 The SPIRIT checklist is copyrighted by the SPIRIT Group under the Creative Commons "[Attribution-  
8 NonCommercial-NoDerivs 3.0 Unported](#)" license.  
9  
10  
11  
12  
13  
14  
15  
16  
17  
18  
19  
20  
21  
22  
23  
24  
25  
26  
27  
28  
29  
30  
31  
32  
33  
34  
35  
36  
37  
38  
39  
40  
41  
42  
43  
44  
45  
46  
47  
48  
49  
50  
51  
52  
53  
54  
55  
56  
57  
58  
59  
60

# BMJ Open

## Efficacy of acupuncture vs sham acupuncture or waitlist control for patients with chronic plantar fasciitis: study protocol for a 2-center randomized controlled trial

|                                 |                                                                                                                                                                                                                                                                                                                                                                                                                                                                                                                                                                                                                                                                                               |
|---------------------------------|-----------------------------------------------------------------------------------------------------------------------------------------------------------------------------------------------------------------------------------------------------------------------------------------------------------------------------------------------------------------------------------------------------------------------------------------------------------------------------------------------------------------------------------------------------------------------------------------------------------------------------------------------------------------------------------------------|
| Journal:                        | <i>BMJ Open</i>                                                                                                                                                                                                                                                                                                                                                                                                                                                                                                                                                                                                                                                                               |
| Manuscript ID                   | bmjopen-2020-036773.R2                                                                                                                                                                                                                                                                                                                                                                                                                                                                                                                                                                                                                                                                        |
| Article Type:                   | Protocol                                                                                                                                                                                                                                                                                                                                                                                                                                                                                                                                                                                                                                                                                      |
| Date Submitted by the Author:   | 20-Jul-2020                                                                                                                                                                                                                                                                                                                                                                                                                                                                                                                                                                                                                                                                                   |
| Complete List of Authors:       | Wang, Weiming; Guang'anmen Hospital, China Academy of Chinese Medical Sciences, Department of acupuncture<br>Liu, Sixing; Guizhou University of Traditional Chinese Medicine, School of Acupuncture-Moxibustion and Tuina,<br>Liu, Yan<br>Zang, Zhiwei; Yantai Hospital of Traditional Chinese Medicine, Department of Acupuncture<br>Zhang, Weina; Guang'anmen Hospital, China Academy of Chinese Medical Sciences, Department of Acupuncture<br>Li, Liang; Guang'anmen Hospital, China Academy of Chinese Medical Sciences, Department of Ultrasound<br>Liu, zhishun; Guang'an men Hospital Affiliated to China Academy of Chinese Medical Sciences, acupuncture and moxibustion department |
| <b>Primary Subject Heading</b>: | Medical management                                                                                                                                                                                                                                                                                                                                                                                                                                                                                                                                                                                                                                                                            |
| Secondary Subject Heading:      | Complementary medicine                                                                                                                                                                                                                                                                                                                                                                                                                                                                                                                                                                                                                                                                        |
| Keywords:                       | COMPLEMENTARY MEDICINE, PAIN MANAGEMENT, Clinical trials < THERAPEUTICS                                                                                                                                                                                                                                                                                                                                                                                                                                                                                                                                                                                                                       |
|                                 |                                                                                                                                                                                                                                                                                                                                                                                                                                                                                                                                                                                                                                                                                               |

SCHOLARONE™  
Manuscripts



I, the Submitting Author has the right to grant and does grant on behalf of all authors of the Work (as defined in the below author licence), an exclusive licence and/or a non-exclusive licence for contributions from authors who are: i) UK Crown employees; ii) where BMJ has agreed a CC-BY licence shall apply, and/or iii) in accordance with the terms applicable for US Federal Government officers or employees acting as part of their official duties; on a worldwide, perpetual, irrevocable, royalty-free basis to BMJ Publishing Group Ltd ("BMJ") its licensees and where the relevant Journal is co-owned by BMJ to the co-owners of the Journal, to publish the Work in this journal and any other BMJ products and to exploit all rights, as set out in our [licence](#).

The Submitting Author accepts and understands that any supply made under these terms is made by BMJ to the Submitting Author unless you are acting as an employee on behalf of your employer or a postgraduate student of an affiliated institution which is paying any applicable article publishing charge ("APC") for Open Access articles. Where the Submitting Author wishes to make the Work available on an Open Access basis (and intends to pay the relevant APC), the terms of reuse of such Open Access shall be governed by a Creative Commons licence – details of these licences and which [Creative Commons](#) licence will apply to this Work are set out in our licence referred to above.

Other than as permitted in any relevant BMJ Author's Self Archiving Policies, I confirm this Work has not been accepted for publication elsewhere, is not being considered for publication elsewhere and does not duplicate material already published. I confirm all authors consent to publication of this Work and authorise the granting of this licence.

1  
2  
3 1 Title page  
4  
5 2  
6  
7 3 Article title:  
8  
9

10 4 **Efficacy of acupuncture vs sham acupuncture or waitlist control for**  
11  
12 5 **patients with chronic plantar fasciitis: study protocol for a 2-center**  
13  
14 6 **randomized controlled trial**

17 7 Weiming Wang, MD, PhD<sup>1\*</sup>; Sixing Liu, BS<sup>2\*</sup>; Yan Liu, MD<sup>3\*</sup>; Zhiwei Zang, MD<sup>4</sup>;  
18 8 Weina Zhang, BS<sup>1</sup>; Liang Li, MD<sup>5</sup>; Zhishun Liu, MD, PhD<sup>1†</sup>  
19  
20  
21  
22

23 10 1 Department of Acupuncture, Guang'anmen Hospital, China Academy of Chinese  
24 11 Medical Sciences, Beijing, China

25 12 2 School of Acupuncture–Moxibustion and Tuina, Guizhou University of Traditional  
26 13 Chinese Medicine, Guiyang, China

27 14 3 Key Laboratory of Chinese Internal Medicine of Ministry of Education,  
28 15 Dongzhimen Hospital, Beijing University of Chinese Medicine, Beijing, China

29 16 4 Department of Acupuncture, Yantai Hospital of Traditional Chinese Medicine,  
30 17 Yantai, China

31 18 5 Department of Ultrasound, Guang'anmen Hospital, China Academy of Chinese  
32 19 Medical Sciences, Beijing, China  
33  
34  
35  
36  
37  
38

39 20  
40 21 \*These authors contributed equally to this work.  
41  
42  
43  
44  
45  
46

47 22 †Corresponding author: Department of Acupuncture and Moxibustion, Guang' an  
48 23 Men Hospital, China Academy of Chinese Medical Sciences, No.5 Beixiang St.,  
49 24 Xicheng District, Beijing, China, Email: zhishunjournal@163.com.  
50  
51  
52

53 25 **Running title:** acupuncture for chronic plantar fasciitis  
54  
55  
56

57 27 **Word count: abstract 268; main text 4100.**  
58  
59  
60



1  
2  
3  
4 29 **Abstract**

5  
6 30 **Introduction:** Plantar fasciitis (PF) is reported to be the most common cause of  
7  
8  
9 31 plantar heel pain. Acupuncture has been used for patients experiencing PF, but  
10  
11  
12 32 evidence of the efficacy of acupuncture on PF is limited. The primary objective of this  
13  
14  
15 33 trial is to compare combined acupuncture and sham acupuncture (SA) versus waitlist  
16  
17  
18 34 control for improving the level of pain experienced by patients suffering from chronic  
19  
20 35 PF.

21  
22 36 **Methods and Analysis:** This will be a two-center, parallel-group, sham and  
23  
24  
25 37 no-treatment controlled, assessor-blinded randomized trial. We will randomly allocate  
26  
27  
28 38 120 participants with chronic PF to acupuncture, SA, and waitlist control groups at a  
29  
30  
31 39 ratio of 2:1:1. Participants in the acupuncture and SA groups will receive a 30-minute  
32  
33  
34 40 acupuncture or SA treatment for a total of 12 sessions over 4 weeks, with a 12-week  
35  
36  
37 41 follow-up. Participants in the waitlist control group will not undergo treatment for a  
38  
39  
40 42 period of 16 weeks but instead will have the option of 4 weeks (12 sessions) of  
41  
42  
43 43 acupuncture free of charge at the end of the follow-up period. The primary outcome  
44  
45  
46 44 will be the treatment response rate 4 weeks after randomization, assessed as a  
47  
48  
49 45 minimum of 50% improvement in the worst pain intensity during the first steps in the  
50  
51  
52 46 morning compared with the baseline. All analyses will be performed with a 2-sided *P*  
53  
54  
55 47 value of  $< 0.05$  considered significant following the intention-to-treat principle.

56  
57 48 **Ethics and Dissemination:** The study has been approved by the Ethical Committee  
58  
59 49 of the Guang'anmen Hospital, China Academy of Chinese Medical Sciences  
60  
50 (approval No: 2019-210-KY). The results will be disseminated through presentation

1  
2  
3  
4 51 at a peer-reviewed medical journal, the relevant conferences and scientific meetings.  
5  
6

7 52 **Key words:** acupuncture; chronic plantar fasciitis; pain intensity; clinical trial  
8

9 53 **Trial registration:** ClinicalTrials.gov identifier: NCT 04185259.  
10

11 54 **Strengths and limitations of this study:**  
12

13  
14 55 ▶ This study is the first randomized controlled trial comparing combined  
15  
16  
17 56 acupuncture and sham acupuncture versus waitlist control for pain relief in  
18  
19  
20 57 participants with chronic PF.  
21

22 58 ▶ The advantages to this study include sham acupuncture and waitlist control design,  
23  
24  
25 59 objective measurements (i.e. PPT, PFT), strict quality control and evaluation of  
26  
27  
28 60 participants' expectation regarding acupuncture.  
29

30 61 ▶ The 2:1:1 allocation ratio used in this trial could facilitate recruitment and enhance  
31  
32  
33 62 patient adherence by allowing more patients to receive acupuncture.  
34

35 63 ▶ Acupuncturists and participants in the waitlist control group will not be blinded,  
36  
37  
38 64 which may cause bias.  
39

40 65 ▶ A high dropout rate may exist in the waitlist group because participants expect to  
41  
42  
43 66 receive acupuncture treatment when they join the trial.  
44

45 67  
46

47  
48 68  
49  
50  
51  
52  
53  
54  
55  
56  
57  
58  
59  
60

## 69 **Background**

70 Plantar fasciitis (PF), which presents with heel pain and tenderness particularly at the  
71 plantar aspect of the calcaneal tuberosity <sup>1</sup> upon the initiation of weight bearing, is  
72 one of the most prevalent complaints encountered by foot and ankle specialists. It is  
73 reported that 1 in 10 people suffer from inferior heel pain within their lifetime <sup>2</sup> and  
74 this condition is attributed to PF in 80% of cases.<sup>3</sup> PF predominantly affects elderly  
75 and middle-aged individuals <sup>4</sup> and is more frequent in runners or those whose  
76 employment requires standing.<sup>5</sup> The exact etiology of PF is multifactorial and not  
77 completely understood. Physical-mechanical overload and micro tears within the  
78 fascia <sup>6</sup> could be involved in the development of PF, resulting in localized  
79 inflammation and degeneration of the proximal plantar aponeurosis.<sup>7</sup>

80 The available treatment options for PF mainly include non-operative treatments  
81 (e.g., plantar fascia and gastrocnemius soleus muscle stretching, heel cups, arch  
82 supports, night splints, shockwave therapy, nonsteroidal antiinflammatory drugs  
83 (NSAIDs), local corticosteroid injections), and operative management.<sup>8</sup> However, no  
84 consensus has been reached regarding the most beneficial treatment method for PF.<sup>9</sup>  
85 Although conservative treatment of PF is successful in the vast majority of cases <sup>10</sup>  
86 and many PF cases are self-limiting and eventually enter remission, it can take up to  
87 months or even years for patients to recover.<sup>11</sup> Moreover, approximately 10 to 20% of  
88 patients are recalcitrant to conventional treatments, resulting in foot pain and/or  
89 disabilities for years.<sup>12</sup>

90 Acupuncture, an integral part of traditional Chinese medicine (TCM), is a  
91 technique whereby the acupoints located on specific body areas are pierced with fine  
92 needles for therapeutic purposes based on the principles of TCM.<sup>13</sup> Acupuncture has  
93 been used in the management of PF and other musculoskeletal pain-related conditions

1  
2  
3 94 for thousands of years. Mechanistic studies have revealed that acupuncture can induce  
4  
5 95 an analgesic response via the release of neuropeptides (e.g., enkephalin, dynorphin,  
6  
7 96  $\beta$ -endorphin, and endomorphin).<sup>14</sup> Two recent systematic reviews <sup>15,16</sup> found that  
8  
9 97 acupuncture may reduce pain intensity and improve plantar function for patients with  
10  
11 98 PF. However, there were methodological problems with the small sample sizes, lack  
12  
13 99 of control with a placebo/waitlist group, or no adjustment for the confounding effects  
14  
15 100 of patients who received combination treatments in the design of the included  
16  
17 101 acupuncture literature. Therefore, the placebo effects of acupuncture and spontaneous  
18  
19 102 remission of PF cannot be excluded and the beneficial effects of acupuncture for PF  
20  
21 103 remain in need of further assessment.

22  
23  
24  
25  
26 104 We designed a randomized controlled trial to evaluate the efficacy of acupuncture,  
27  
28 105 compared with sham acupuncture (SA) or being on a waitlist control group, for  
29  
30 106 patients with chronic PF for >6 months. Given that clinical and experimental results  
31  
32 107 have shown that SA can induce a significant alleviation of pain similar to verum  
33  
34 108 acupuncture <sup>17</sup>due to non-specific effects (e.g., acupuncture expectations), the primary  
35  
36 109 hypothesis in this trial was that combined acupuncture and SA will result in larger  
37  
38 110 improvements in heel pain than no acupuncture treatment in patients with chronic PF.  
39  
40 111 The secondary hypothesis examined whether acupuncture can reduce heel pain  
41  
42 112 intensity more effectively than SA or no acupuncture.

## 43 113 **Methods and design**

### 44 114 **Study design**

45  
46  
47 115 This will be a two-center, parallel-group, sham and no-treatment controlled,  
48  
49 116 assessor-blinded randomized trial comprising three arms with a 2:1:1 allocation rate.  
50  
51 117 We will design the protocol in accordance with standard protocol items including the  
52  
53 118 Recommendations for Interventional Trials <sup>18</sup> and the Standards for Reporting  
54  
55  
56  
57  
58  
59  
60

1  
2  
3 119 Interventions in the Clinical Trials of Acupuncture<sup>19</sup> guidelines. The study flow chart  
4  
5  
6 120 and study schedule are shown in Figs. 1 and 2.

7  
8 121 **Study setting and recruitment**

9  
10 122 This trial is planned to be conducted at Guang'anmen Hospital, China Academy of  
11  
12 123 Chinese Medical Sciences, and Yantai Hospital of Traditional Chinese Medicine from  
13  
14 124 March 2020 to March 2022. A total of 120 participants will be publicly recruited  
15  
16  
17 125 through the use of posters and hospital webs in the two participating hospitals. The  
18  
19 126 duration of the trial for each participant will be 17 weeks: 1-week baseline, 4-week  
20  
21  
22 127 treatment, and 12-week follow-up.

23  
24 128 **Randomization and Blinding**

25  
26 129 The eligible participants who sign an informed consent form will complete a 1-week  
27  
28 130 baseline assessment before randomization, which includes foot symptoms,  
29  
30 131 functionality, and ultrasound examinations, as well as participants' expectation (see  
31  
32  
33 132 Fig. 2). Participants will be randomized into the acupuncture group, SA group, or  
34  
35 133 waitlist (no acupuncture) group at a ratio of 2:1:1 using simple randomization.  
36  
37 134 Randomization will be generated with the PROC PLAN in SAS 9.4 (SAS Institute  
38  
39 135 Inc., Cary, NC, USA). Details of the group allocation will be concealed on cards  
40  
41  
42 136 inside sealed opaque envelopes by the staff member responsible for the allocation. A  
43  
44 137 research coordinator, who will not be involved in the treatment and outcome  
45  
46 138 assessments, will be responsible for contacting participants and allocating them to  
47  
48 139 their assigned group. Participants in the acupuncture and SA groups, together with  
49  
50 140 efficacy evaluators and data analysts will be blinded to the group assignments.  
51  
52  
53 141 Participants in the waitlist control group and acupuncturists will not be blinded.

54  
55  
56 142 **Participants**

1  
2  
3 143 Participants with a diagnosis of PF by an orthopedist on clinical grounds will be  
4  
5 144 included in the study only if they meet all of the following inclusion criteria and do  
6  
7  
8 145 not fulfill any of the exclusion criteria. Diagnosis of PF will be made according to the  
9  
10 146 guidelines described by the Orthopaedic Section of American Physical Therapy  
11  
12 147 Association.<sup>20</sup> The following clinical findings will be used to diagnose PF: plantar  
13  
14 148 medial heel pain during the initial steps after a period of inactivity but also worse pain  
15  
16 149 following prolonged weight bearing, heel pain precipitated by a recent increase in  
17  
18 150 weight-bearing activity, physical examination findings (heel pain with palpation of  
19  
20 151 the proximal insertion of the plantar fascia, limited ankle range of motion,), abnormal  
21  
22 152 foot posture index, high body mass index, as well as a positive windlass test and  
23  
24 153 negative tarsal tunnel tests.

25  
26  
27  
28 154 **Inclusion criteria:**

- 29  
30 155 1. Age  $\geq 18$  years and  $\leq 75$  years;  
31  
32 156 2. History of plantar medial heel pain for at least 6 months before enrolment;  
33  
34 157 3. Reported an average worst pain intensity at first steps in the morning over the last  
35  
36 158 7 days of at least 50 mm on a 100-mm visual analog scale (VAS) before  
37  
38 159 enrolment;  
39  
40 160 4. Failure to respond to conservative treatment for  $\geq 1$  months, including any of the  
41  
42 161 following modalities: stretching exercises, nonsteroidal anti-inflammatory drugs,  
43  
44 162 shockwave therapy, dry needling and orthotics;  
45  
46 163 5. Ability to comply with the study protocol, understand the medical information  
47  
48 164 forms as well as having provided informed consent.  
49  
50  
51  
52

53 165 **Exclusion criteria:**  
54  
55  
56  
57  
58  
59  
60

- 166 1. History of calcaneus fracture, calcaneal bone tumor or cyst, plantar fascia rupture,  
167 or having a significant foot deformity (clubfoot, pes cavus, or pes  
168 calcaneovalgus);
- 169 2. Previous injection (corticosteroid, platelet-rich plasma, lidocaine needling), or  
170 radiation, or surgery to plantar fascia within 6 months preceding enrollment;
- 171 3. Lumbosacral radiculopathy or peripheral neuropathy around the ankle joint such  
172 as nerve entrapment tarsal tunnel syndrome or Achilles tendinopathy;
- 173 4. Systemic disorders like rheumatoid arthritis, gout, Reiter syndrome, type 1 or 2  
174 diabetes mellitus, osteoporosis, spondyloarthritis, or osteomyelitis;
- 175 5. Joint, bone, or skin infection in the affected foot;
- 176 6. Clinically significant cardiovascular disorder, severe hepatic/renal insufficiency or  
177 coagulation disorder at baseline as determined by the investigator;
- 178 7. Known phobia to acupuncture or receiving acupuncture treatment within 4 weeks  
179 prior to enrollment.

## 180 **Interventions**

### 181 **Acupuncture group**

182 The acupuncture protocol was developed by the consensus of three experts based on  
183 the meridian theory of TCM and was used in our previous trial.<sup>21</sup> Licensed  
184 acupuncturists with more than 2 years of acupuncture experience will perform the  
185 treatment. We will apply needles to two Ashi points (the two most severe tender  
186 points in the most sensitive area over the anteromedial aspect of the heels, according  
187 to the participant's perceived pain upon palpation) as well as the Chengshan (BL57),  
188 Taixi (KI3), and Kunlun (BL60) acupoints in this trial. The position of the  
189 aforementioned acupoints will be based on the Nomenclature and location of  
190 acupuncture points <sup>22</sup> designated by the National Standard of the People's Republic of

1  
2  
3 191 China (GB/T 12 346-2006). Sterile disposable stainless steel needles (Hwato brand,  
4  
5 192 Suzhou Medical Appliance Factory, Suzhou, China; 0.3 mm × 40 mm) will be used.  
6  
7  
8 193 With the patient in a prone position, the local skin will be routinely sterilized,  
9  
10 194 followed by pasting a 10-mm diameter and 5-mm thick sterile adhesive pad (Hwato  
11  
12 195 brand, Suzhou Medical Appliance Factory, Suzhou, China) onto each selected  
13  
14 196 acupoint. Ashi points will be perpendicularly inserted through the pad to the plantar  
15  
16 197 fascia layer with a depth of approximately 15-20 mm depending on the location.  
17  
18 198 BL57, KI3, and BL60 will be punched perpendicularly 10-15 mm deep into the skin  
19  
20 199 through the pad. All needles except the Ashi points will be manually stimulated with  
21  
22 200 small, equal manipulations of lifting, thrusting, twirling, and rotating to achieve De qi  
23  
24 201 (a sensation including soreness, numbness, distention, and heaviness).<sup>23</sup> Needles will  
25  
26 202 be retained for 30 minutes per treatment. During each treatment, every needle will be  
27  
28 203 manipulated three times every 10 minutes.

#### 204 **SA group**

205 In the SA group, sham Ashi (0.5 cun away from Ashi, one ‘cun’ is equivalent to the  
206 greatest width of the individual patients’ thumb, ~1.5 cm), sham BL57 (0.5 cun lateral  
207 to the true BL57 horizontally), sham KI3 (midway between the true KI3 and the  
208 heel tendon) and sham BL60 (midway between the true BL60 and the heel tendon)  
209 will be used. The treatment protocol will be similar to that of the acupuncture group.  
210 The Hwato-brand disposable blunt-tipped needles (size 0.30 × 25 mm) will be  
211 inserted at the sham points through the adhesive pads attached to the skin without skin  
212 penetration. The needles will then be lifted, thrust, twirled, and rotated evenly three  
213 times every 10 minutes. No specific De qi response will be elicited.

#### 214 **Waitlist control group**



1  
2  
3 215 Participants will receive no treatment for their heel pain for a period of 16 weeks after  
4  
5 216 randomization, and subsequently have the option of 4 weeks (12 sessions) of  
6  
7 217 acupuncture free of charge at the end of the follow-up period.  
8  
9

10 218 The intervention will last for 30 minutes in the acupuncture and SA groups, and  
11  
12 219 will be performed three times per week for a total of 12 sessions in four consecutive  
13  
14 220 weeks. If participants suffer pain bilaterally, the acupuncturists will treat both sides  
15  
16 221 and evaluate the more severe side. Participants in all groups will be treated and (or)  
17  
18 222 evaluated separately. Participants in all groups will be advised to use soft heel foot  
19  
20 223 wear, not to stand for a long time, and not to walk barefoot during the 17-week study  
21  
22 224 period.  
23  
24

#### 25 225 **Rescue medication**

26  
27  
28 226 Additional therapies for heel pain during the entire study period will be prohibited.  
29  
30 227 However, the investigator will be permitted to prescribe ibuprofen (sustained release  
31  
32 228 type, 300 mg/T, Tianjin Smith Kline & French Laboratories Ltd., Tianjin, China) as  
33  
34 229 rescue medication no more than 2 days per week up to the maximum daily dose if  
35  
36 230 unbearable heel pain occurs. Participants will be required not to take rescue  
37  
38 231 medication within 72 h before the baseline and outcome measurements. In the event  
39  
40 232 rescue medication needs to be taken after the baseline measurement, the participant  
41  
42 233 will postpone the next visit to the treatment center.  
43  
44  
45

#### 46 234 **Outcome measures**

##### 47 235 **Primary outcome**

48  
49  
50 236 The primary outcome used in this trial will be the proportion of participants with a  
51  
52 237 treatment response 4 weeks after randomization, defined as a minimum of 50%  
53  
54 238 improvement in the worst pain intensity during the first steps in the morning  
55  
56 239 compared with the baseline. The average worst pain intensity over the last 3 days will  
57  
58  
59  
60

1  
2  
3 240 be used for analysis in this trial. Pain intensity will be measured using a 0-100 VAS,  
4  
5 241 with 0 indicating no pain and 100 indicating maximal pain. Participants who must  
6  
7 242 resort to additional treatments other than rescue medication will be classified as  
8  
9  
10 243 nonresponders. In addition, the responder rate at weeks 8 and weeks 16 will also be  
11  
12 244 assessed.

### 15 245 **Secondary outcomes**

17 246 The secondary outcomes are as follows:

- 19 247 1. Changes in the VAS score for worst pain intensity during the first steps in the  
21 248 morning from baseline to 4, 8, and 16 weeks after randomization;
- 24 249 2. Changes in the VAS score for mean pain intensity during the day from baseline to  
26 250 4, 8, and 16 weeks after randomization;
- 28 251 3. Changes in the pressure pain threshold (PPT) at the most painful area from  
30 252 baseline to 4, 8, and 16 weeks after randomization. PPT is defined as the  
32 253 minimum pressure detected when the sensation of pressure first changes to a  
34 254 sensation of pain.<sup>24</sup> PPT will be tested with a pressure algometer (Fabrication  
36 255 Enterprises, Inc., White Plains, NY; from 1 kg/cm<sup>2</sup> to 5 kg/cm<sup>2</sup>) using a metal  
38 256 probe with a 0.5 cm<sup>2</sup> rubber disc by a trained researcher. PPT will be measured  
40 257 when the participant is lying supine in a relaxed position with the affected foot  
42 258 hanging over the edge of the bed. When measuring the PPT, the rubber disc will  
44 259 be placed perpendicularly on the painful spot and pressure will be applied at a rate  
46 260 of approximately 0.1 kg/cm<sup>2</sup>/s through the metal probe of the pressure algometer.  
48 261 Participants will be informed to report when the initial pain sensation occurs, and  
50 262 the readings of the algometer will be recorded. The score will be determined by  
52 263 averaging three repeated measurements with 30 seconds between each trial. All  
54 264 values below 1 kg/cm<sup>2</sup> will be reported as 0.5 kg/cm<sup>2</sup>.

- 1  
2  
3 265 4. Changes in the ankle range of motion (AROM) from baseline to 4, 8, and 16  
4  
5 266 weeks after randomization: The examiner will measure the AROM including  
6  
7 267 dorsiflexion and plantar flexion in 2 positions (flexed knee and extended knee)  
8  
9 268 using a digital goniometer (Tangxia Electronic Instrument Factory, Dongguan,  
10  
11 269 from 0° to 360°). For the flexed-knee assessment, the participant will sit in a  
12  
13 270 relaxed station with the popliteal space at the edge of the table and their knees  
14  
15 271 with 90° of flexion. For the extended-knee assessment, the participant will be  
16  
17 272 seated on a treatment table with the knees fully extended (0°) and the feet hanging  
18  
19 273 off the end of the table. The axis of the goniometer will be placed at the lateral  
20  
21 274 malleolus. The stationary arm will be placed parallel to the fifth metatarsal and the  
22  
23 275 moving arm placed parallel to the center of the fibular head. The ankle will be  
24  
25 276 passively moved from a neutral starting position into dorsiflexion and plantar  
26  
27 277 flexion until a firm end feel is elicited<sup>25</sup> and the readings of the goniometer will  
28  
29 278 be registered. The mean score of three trials with 10 seconds between each  
30  
31 279 examination will be calculated and used for analysis.  
32  
33  
34  
35  
36  
37 280 5. Changes in the Foot and Ankle Ability Measure (FAAM) total score and subscale  
38  
39 281 scores from baseline to 4, 8, and 16 weeks after randomization: The FAAM is a  
40  
41 282 self-reported questionnaire concerning 21 activities of daily living (ADL) items  
42  
43 283 and eight sports subscale items.<sup>26</sup> Each item is scored on a 0-4 point Likert scale  
44  
45 284 anchored by 0 (unable to do) and 4 (no difficulty at all), with higher total scores  
46  
47 285 indicating a higher level of function. The FAAM has a maximum potential score  
48  
49 286 of 116 (84 ADL and 32 sport subscales). The obtained score (total, ADL, and  
50  
51 287 sport subscale scores) is divided by the maximum potential score and multiplied  
52  
53 288 by 100 to obtain a percentage. If the patient does not respond, the specific  
54  
55 289 question will be left blank and not be a part of the final value of the questionnaire.  
56  
57  
58  
59  
60

- 1  
2  
3 290 In this trial, we will use the previously validated Chinese version of the FAAM.<sup>27</sup>  
4  
5  
6 291 6. Change in plantar fascia thickness (PFT) from baseline to 4 weeks after  
7  
8 292 randomization: PFT will be measured at the thickest point closest to the calcaneal  
9  
10 293 insertion in its medial portion using ultrasound. The ultrasound scan will be  
11  
12 294 performed using an 8-12 MHz linear probe with the patient in the prone position  
13  
14  
15 295 at the baseline and at 4 weeks after randomization.  
16  
17 296 7. Participant global assessment of improvement: Participants will be asked to rate  
18  
19 297 their global improvement using a 7-point scale. The improvement will be scaled  
20  
21 298 from 1 (complete recovery) to 7 (vastly worse), with 2 being obvious  
22  
23 299 improvement, 3 being a little improvement, 4 being no change, 5 being a little  
24  
25 300 worse, and 6 being obviously worse. The proportions of participants with different  
26  
27 301 degrees of improvement will be assessed at 4, 8, and 16 weeks after  
28  
29 302 randomization. Scales of participant global assessment of improvement with 7  
30  
31 303 response categories have been rated as relatively easy to use and show good  
32  
33 304 reliability and validity.<sup>28</sup>  
34  
35  
36  
37 305 8. Participants' expectation towards acupuncture at baseline: At baseline,  
38  
39 306 participants in the acupuncture and SA groups will be asked the following  
40  
41 307 question: "Do you think acupuncture will be helpful to improve your chronic PF?"  
42  
43 308 Participant will choose one of the following answers: "Extremely helpful", "Very  
44  
45 309 helpful", "Helpful", "Not help at all", and "Unclear".  
46  
47  
48  
49 310 9. The proportion of participants who have maintained blinding during treatment in  
50  
51 311 the acupuncture and SA groups: Participants' blindness to the mode of  
52  
53 312 acupuncture will be assessed five minutes after the end of any treatment in the  
54  
55 313 fourth week by asking the patients the following question: "Which of the two  
56  
57 314 acupuncture modalities do you think you received, acupuncture or SA?"  
58  
59  
60

1  
2  
3 315 Participants will choose one of the following answers: “Acupuncture”, “SA”, or  
4  
5 316 “Unclear”. Prior to the question, patients will be informed that they may have  
6  
7  
8 317 received one of two modalities: acupuncture with a deeper insertion or SA with no  
9  
10 318 skin penetration.

### 319 **Safety assessment**

320 The adverse events (AEs) during the entire study will be recorded and described as  
321 acupuncture-related AEs and non-acupuncture-related AEs. Acupuncture-related AEs  
322 include fainting, broken needle, unbearable pain during acupuncture (VAS  $\geq 8$ , using  
323 VAS from 0 [no pain] to 10 [worst pain imaginable]), and other unintended signs or  
324 symptoms after acupuncture (e.g., localized hematoma or infection, nausea, dizziness,  
325 vomiting, headache, palpitations). Detailed information on AEs including the name,  
326 onset, end date, intensity, correlation with acupuncture, and outcomes will be  
327 documented in the case report form. Investigators will immediately report serious AEs  
328 (eg, requiring hospitalization, causing disability or impaired ability to work) to the  
329 Medical Ethics Committee of Guang’anmen Hospital, and stop the clinical trial until  
330 further instruction is given.

### 331 **Sample size calculation**

332 Based on the results of a previous study,<sup>12</sup> a sample size of 120 participants will be  
333 enrolled to provide 80% power to detect a difference of 35% between the combined  
334 acupuncture group and waiting-list group in the proportion of participants with  
335 treatment response 4 weeks after randomization at a two-sided significance level of  
336 0.05. The proportion of participants with treatment response after 4 weeks was  
337 assumed to be roughly 12% for the waiting-list group,<sup>12</sup> with an anticipated 10% loss  
338 to follow-up.

### 339 **Statistical analysis**

1  
2  
3 340 The null hypothesis is that the proportion of participants with treatment response 4  
4  
5 341 weeks after randomization will be the same for the combined acupuncture groups and  
6  
7 342 waiting-list group. Data will be presented as mean  $\pm$  standard deviation for  
8  
9 343 quantitative variables and frequencies (number of cases), with relative frequencies  
10  
11 344 (percentages) for categorical variables. The primary outcome analysis will use the  
12  
13 345 Cochran-Mantel-Haenszel (CMH) test to compare the response rate between the  
14  
15 346 combined acupuncture groups and the waiting-list group. If the result of this analysis  
16  
17 347 is significant, hierarchical testing will be applied to the acupuncture group versus  
18  
19 348 waiting-list group, SA group versus waiting-list group, and acupuncture group versus  
20  
21 349 SA group. For normally distributed quantitative variables, a repeated-measures  
22  
23 350 analysis of variance (ANOVA) with multiple comparisons post-hoc test will be  
24  
25 351 performed using baseline as a co-variate when comparing more than two groups and  
26  
27 352 an unpaired T test when comparing two groups. For non-normally distributed  
28  
29 353 quantitative variables, the non-parametrical Kruskal-Wallis test and Mann-Whitney  
30  
31 354 test will be performed. For categorical variables, the Chi square ( $\chi^2$ ) test will be used.  
32  
33 355 Confidence intervals for the difference between treatments will be calculated at the  
34  
35 356 95% level. A two-tailed test will be applied for all available data, and a *P* value  $< 0.05$   
36  
37 357 will be considered statistically significant. All analyses in this trial will be performed  
38  
39 358 using SPSS software V.20.0 (IBM SPSS Statistics; IBM Corp, Somers, NY) on the  
40  
41 359 basis of the intention-to-treat (ITT) population, which will include participants who  
42  
43 360 had been randomized. Missing data will be completed as the last value observed  
44  
45 361 before dropout. No adjustment will be made for multiple outcomes.  
46  
47  
48  
49  
50  
51  
52  
53

### 362 **Quality control**

54  
55 363 To ensure the quality of the trial, all the relevant staff will be uniformly trained before  
56  
57 364 the trial on the purpose and content of the trial (e.g., diagnosis of chronic PF,  
58  
59  
60

1  
2  
3 365 inclusion and exclusion criteria, intervention procedures, and outcome measures).  
4  
5 366 Licensed acupuncturists with at least 2 years' acupuncture experience will perform  
6  
7 367 the treatment. Throughout the trial, strict three-level monitoring will be conducted for  
8  
9 368 data quality control. Dropouts and withdrawals including the reasons will be recorded  
10  
11 369 during the trial. Paper-based study data will be stored in locked file cabinets under the  
12  
13 370 management of the investigators. Electronic records will be stored in a Structured  
14  
15 371 Query Language (SQL) server database on a limited access, secure server maintained  
16  
17 372 by the Guang'anmen Hospital, China Academy of Chinese Medical Sciences.  
18  
19  
20

### 21 373 **Patient and public involvement**

22  
23  
24 374 The research question of whether combined acupuncture and SA will result in larger  
25  
26 375 improvements in heel pain than no acupuncture treatment for patients with chronic PF  
27  
28 376 was first proposed by the investigator after encountering a patient who received SA  
29  
30 377 and reported a similar improvement in heel pain as another patient who received  
31  
32 378 routine acupuncture in the clinic. Patients were not involved in conceiving or  
33  
34 379 implementing the study.  
35  
36

### 37 380 **Ethics and dissemination**

38  
39  
40 381 This trial will be conducted in accordance with the principles of the Declaration of  
41  
42 382 Helsinki. The study has been registered at the ClinicalTrials.gov (NCT04185259) and  
43  
44 383 approved by the Ethical Committee of the Guang'anmen Hospital, China Academy of  
45  
46 384 Chinese Medical Sciences (approval No: 2019-210-KY). All participants must sign  
47  
48 385 the informed consent form prior to randomization, and they will be permitted to  
49  
50 386 withdraw at any time during the trial, with or without reasons being provided. Any  
51  
52 387 amendment or other change of the protocol will need to be approved by the Ethical  
53  
54 388 Committee of the Guang'anmen Hospital, China Academy of Chinese Medical  
55  
56 389 Science, and agreed to by the co-researchers.  
57  
58  
59  
60

1  
2  
3 390 Following analysis of the data, the findings of this study will be submitted for  
4  
5 391 publication in a peer-reviewed medical journal. The results will also be disseminated  
6  
7  
8 392 through presentation at the relevant conferences and scientific meetings.  
9

### 10 393 **Discussion**

11  
12 394 Although several reviews and RCTs<sup>15,16,12,29</sup> have been published that focus on  
13  
14 395 acupuncture for PF, owing to the lack of a placebo control, non-specific physiology  
15  
16  
17 396 effects of needling and spontaneous remission of PF cannot be excluded. To date, this  
18  
19 397 is the first randomized trial with three parallel arms, assessing whether combined  
20  
21 398 acupuncture and SA compared to no treatment control produce a significant reduction  
22  
23 399 in pain intensity in chronic PF. We anticipate that this study will determine the  
24  
25 400 efficacy of acupuncture for patients with chronic PF, and improve the care of these  
26  
27 401 patients in the clinic.  
28  
29

30 402 Though most PF patients will achieve significant improvement in symptoms  
31  
32 403 within 1 year regardless of treatment,<sup>30</sup> many will seek treatment before then. Patients  
33  
34 404 often choose other treatment options when they cannot obtain a satisfactory outcome  
35  
36 405 from conservative treatment (e.g., muscle stretching, heel cups, arch supports, night  
37  
38 406 splints, shockwave therapy, NSAIDs). In this trial, we recruited only chronic  
39  
40 407 participants who had failed to respond to conservative treatment prior to participation.  
41  
42 408 The results can be generalized to patients experiencing chronic refractory PF.  
43  
44  
45

46  
47 409 In this study, pain intensity measured with VAS during the first steps in the  
48  
49 410 morning will be used as the primary outcome. This variable has been used in previous  
50  
51 411 trials<sup>12,21</sup> and is a meaningful subject outcome measure for the assessment of PF  
52  
53 412 improvement. In addition, we will also use PPT and PFT as objective secondary  
54  
55 413 outcomes. PPT is an essential evaluation tool for patients suffering from many  
56  
57 414 musculoskeletal disorders including PF and provides a reliable process for measuring  
58  
59  
60



1  
2  
3 415 participants' responses to mechanical stimuli.<sup>31</sup> Compared to normal asymptomatic  
4  
5 416 patients, patients with PF often exhibit a thickened plantar fascia on ultrasound.<sup>32</sup>  
6  
7  
8 417 Therefore, a PFT evaluation would provide information to detect the anatomical  
9  
10 418 changes that occur in the plantar fascia after acupuncture.

11  
12 419 The strengths of this study include a sham control (non-penetrating at  
13  
14 420 non-acupuncture point) and waitlist control design, objective measurements (i.e. PPT,  
15  
16 421 PFT), strict quality control, and evaluation of the participants' expectations regarding  
17  
18 422 acupuncture. Several limitations to this trial need to be acknowledged. First, it will be  
19  
20 423 impossible to blind the acupuncturists and participants in the waitlist control group,  
21  
22 424 which is a general problem in non-pharmacological interventional trials and can cause  
23  
24 425 bias. Second, a high dropout rate may exist in the waitlist group because participants  
25  
26 426 expect to receive acupuncture treatment when they join the trial. Third, the follow-up  
27  
28 427 period will not exceed 12 weeks, which will not allow for detection of the long-term  
29  
30 428 effects of acupuncture for chronic PF. Fourth, our approach will enable us to draw  
31  
32 429 conclusions about the selected acupuncture points but not about individualized  
33  
34 430 treatments. Fifth, there are multiple secondary outcomes in this trial, which may  
35  
36 431 increase the risk of type I error.  
37  
38  
39  
40  
41  
42  
43  
44  
45  
46  
47  
48  
49  
50  
51  
52  
53  
54  
55  
56  
57  
58  
59  
60

1  
2  
3 432  
4

5 433 **Ethical Approval and Consent to participate** The study has received approval from  
6  
7 434 the Institutional Review Boards of Guang'anmen Hospital in China (approval NO.  
8  
9 435 2019-210-KY, TEL +86-10-88001552), and all investigators complied with the  
10  
11  
12 436 Helsinki Declaration.

13  
14 437 **Consent for publication** Not applicable.

15  
16 438 **Availability of data and materials** Not applicable.

17  
18  
19 439 **Competing interests** The authors declare that they have no competing interests.

20  
21 440 **Funding** This RCT is funded by China Academy of Chinese Medical Sciences (Grant  
22  
23 441 No. ZZ13-YQ-019). The funding agency has no role in the design of the study; data  
24  
25 442 collection, management, analysis, and interpretation of the data; preparation, review,  
26  
27 443 or approval of the manuscript.  
28  
29

30  
31 444

32  
33 445 **Authors' contributions** Weiming Wang and Zhishun Liu conceived the idea and  
34  
35 446 designed this trial. Weiming Wang, Zhiwei Zang and Zhishun Liu developed the  
36  
37 447 acupuncture protocol to this article. Weina Zhang, Zhiwei Zang, Sixing Liu and Liang  
38  
39 448 Li will be responsible for the recruitment, acupuncture, and assessment respectively.  
40  
41 449 Yan Liu will be responsible for statistical analysis. This manuscript was drafted by  
42  
43 450 Weiming Wang and Sixing Liu, and was revised by Yan Liu and Zhishun Liu. All  
44  
45 451 authors read and approved the final draft of the manuscript.  
46  
47  
48

49  
50  
51 452

52  
53  
54 453 **Acknowledgments** The authors appreciate the support and efforts from people who  
55  
56 454 will be included in this study.  
57  
58  
59  
60

1  
2  
3  
4  
5  
6  
7  
8  
9  
10  
11  
12  
13  
14  
15  
16  
17  
18  
19  
20  
21  
22  
23  
24  
25  
26  
27  
28  
29  
30  
31  
32  
33  
34  
35  
36  
37  
38  
39  
40  
41  
42  
43  
44  
45  
46  
47  
48  
49  
50  
51  
52  
53  
54  
55  
56  
57  
58  
59  
60

455

456 **References**

- 457 1. Gill LH. Plantar fasciitis: diagnosis and conservative management. *J Am Acad*  
458 *Orthop Surg* 1997;5(2):109-17.
- 459 2. Rosenbaum AJ, DiPreata JA, Misener D. Plantar heel pain. *Med Clin North Am*  
460 2014;98(2):339-52.
- 461 3. Neufeld SK, Cerrato R. Plantar fasciitis: evaluation and treatment. *J Am Acad*  
462 *Orthop Surg* 2008;16(6):338–46.
- 463 4. Cotchett MP, Landorf KB, Munteanu SE, Raspovic A. Effectiveness of trigger  
464 point dry needling for plantar heel pain: study protocol for a randomised  
465 controlled trial. *J Foot Ankle Res.* 2011; 4:5.
- 466 5. Akhbari B, Salavati M, Ezzati K, Mohammadi Rad S. The use of dry needling and  
467 myofascial meridians in a case of plantar fasciitis. *J Chiropr Med*  
468 2014;13(1):43–8.
- 469 6. Cione JA, Cozzarelli J, Mullin CJ. A retrospective study of radiofrequency ther-  
470 mal lesioning for the treatment of neuritis of the medial calcaneal nerve and its  
471 terminal branches in chronic heel pain. *J Foot Ankle Surg* 2009; 48:142-47
- 472 7. Thapa D, Ahuja V. Combination of diagnostic medial calcaneal nerve block  
473 followed by pulsed radiofrequency for plantar fascitis pain: A new modality.  
474 *Indian J Anaesth* 2014; 58:183-85.
- 475 8. Petraglia F, Ramazzina I, Costantino C. Plantar fasciitis in athletes: diagnostic and  
476 treatment strategies. A systematic review. *Muscles Ligaments Tendons J*  
477 2017;7(1):107-18.
- 478 9. Uygur E, Aktaş B, Eceviz E, Yilmazo lu EG, Poyanli O. Preliminary Report on  
479 the Role of Dry Needling Versus Corticosteroid Injection, an Effective Treatment

- 1  
2  
3 480 Method for Plantar Fasciitis: A Randomized Controlled Trial. *J Foot Ankle Surg*  
4  
5 481 2019;58(2):301-5.  
6  
7  
8 482 10. Osman AM, El-Hammady DH, Kotb MM. Pulsed Compared to Thermal  
9  
10 483 Radiofrequency to the Medial Calcaneal Nerve for Management of Chronic  
11  
12 484 Refractory Plantar Fasciitis: A Prospective Comparative Study. *Pain Physician*  
13  
14 485 2016;19(8):E1181-7.  
15  
16  
17 486 11. Young CC, Rutherford DS, Niedfeldt MW. Treatment of plantar fasciitis. *Am Fam*  
18  
19 487 *Physician* 2001;63(3):467-74, 477-8.  
20  
21  
22 488 12. Kummerddee W, Pattapong N. Efficacy of electro-acupuncture in chronic plantar  
23  
24 489 fasciitis: a randomized controlled trial. *Am J Chin Med* 2012;40(6):1167–76.  
25  
26  
27 490 13. Cheuk DKL, Yeung WF, Chung KF, Wong V. Acupuncture for insomnia  
28  
29 491 (Review). *Cochrane Database Syst Rev* 2012; 12;(9):CD005472.  
30  
31 492 14. Wong JY, Rapson LM. Acupuncture in the management of pain of  
32  
33 493 musculoskeletal and neurologic origin. *Phys Med Rehabil Clin N Am*  
34  
35 494 1999;10(3):531–45.  
36  
37  
38 495 15. Clark RJ, Tighe M: The effectiveness of acupuncture for plantar heel pain: a  
39  
40 496 systematic review. *Acupunct Med* 2012;30(4):298–306.  
41  
42  
43 497 16. Thiagarajah AG: How effective is acupuncture for reducing pain due to plantar  
44  
45 498 fasciitis? *Singapore Med J* 2017;58(2):92–7.  
46  
47 499 17. Lundeberg T, Lund I, Sing A, Näslund J. Is Placebo Acupuncture What It Is  
48  
49 500 Intended to Be? *Evid Based Complement Alternat Med* 2011;2011: 932407.  
50  
51  
52 501 18. Chan AW, Tetzlaff JM, Gøtzsche PC, et al. SPIRIT 2013 explanation and  
53  
54 502 elaboration: guidance for protocols of clinical trials. *BMJ* 2013;346:e7586.  
55  
56  
57  
58  
59  
60

- 1  
2  
3 503 19. MacPherson H, Altman DG, Hammerschlag R, et al. Revised Standards for  
4  
5 504 Reporting Interventions in Clinical Trials of Acupuncture (STRICTA): extending  
6  
7 505 the CONSORT statement. *J Evid Based Med* 2010;3:140–55.
- 8  
9  
10 506 20. Martin RL, Davenport TE, Reischl SF, et al. Heel pain-plantar fasciitis: revision  
11  
12 507 2014. *J Orthop Sports Phys Ther* 2014;44(11):A1–33
- 13  
14 508 21. Wang W, Liu Y, Zhao J, et al. Electroacupuncture versus manual acupuncture in  
15  
16 509 the treatment of plantar heel pain syndrome: study protocol for an upcoming  
17  
18 510 randomised controlled trial. *BMJ Open* 2019;9(4):e026147.
- 19  
20  
21 511 22. Standardization Administration of the People’s Republic of China. GB/  
22  
23 512 T12346-2006, Nomenclature and Location of Acupuncture Points [S]. 2006.
- 24  
25 513 23. Zhou K, Fang J, Wang X, et al. Characterization of de qi with electroacupuncture  
26  
27 514 at acupoints with different properties. *J Altern Complement Med*  
28  
29 515 2011;17(11):1007-13.
- 30  
31  
32 516 24. Fischer AA. Pressure algometry over normal muscles. Standard values, validity  
33  
34 517 and reproducibility of pressure threshold. *Pain* 1987;30(1):115-26.
- 35  
36 518 25. Fong CM, Blackburn JT, Norcross MF, et al. Ankle-Dorsiflexion Range of  
37  
38 519 Motion and Landing Biomechanics. *J Athl Train* 2011;46(1):5-10
- 39  
40  
41 520 26. Martin R. Foot and Ankle Ability Measure (FAAM). <http://www.healthsciences.duq.edu/pdf/FAAM12-051.pdf> (Accessed 23 May 2019).
- 42  
43 521  
44  
45 522 27. González-Sánchez M, Li GZ, Ruiz Muñoz M, et al. Foot and ankle ability  
46  
47 523 measure to measure functional limitations in patients with foot and ankle disorders:  
48  
49 524 a Chinese cross-cultural adaptation and validation. *Disabil Rehabil*  
50  
51 525 2017;39(21):2182–9.
- 52  
53  
54  
55  
56  
57  
58  
59  
60

- 1  
2  
3 526 28. Preston CC, Colman AM. Optimal number of response categories in rating scales:  
4  
5 527 reliability, validity, discriminating power, and respondent preferences. *Acta*  
6  
7 528 *Psychol (Amst)* 2000;104(1):1–15.
- 8  
9  
10 529 29. Zhang SP, Yip TP, Li QS. Acupuncture treatment for plantar fasciitis: a  
11  
12 530 randomized controlled trial with six months follow-up. *Evid Based Complement*  
13  
14 531 *Alternat Med* 2011; 2011:1–10.
- 15  
16  
17 532 30. Monteagudo M, Maceira E, Garcia-Virto V, Canosa R. Chronic plantar fasciitis:  
18  
19 533 plantar fasciotomy versus gastrocnemius recession. *Int Orthop*.  
20  
21 534 2013;37(9):1845-50.
- 22  
23  
24 535 31. Saban B, Masharawi Y. Pain threshold tests in patients with heel pain syndrome.  
25  
26 536 *Foot Ankle Int* 2016;37(7):730-6.
- 27  
28  
29 537 32. Mahowald S, Legge BS, Grady JF. The correlation between plantar fascia  
30  
31 538 thickness and symptoms of plantar fasciitis. *J Am Podiatr Med Assoc*  
32  
33 539 2011;101(5):385-9.
- 34  
35  
36  
37  
38  
39  
40  
41  
42  
43  
44  
45  
46  
47  
48  
49  
50  
51  
52  
53  
54  
55  
56  
57  
58  
59  
60

1  
2  
3  
4  
5  
6  
7  
8  
9  
10  
11  
12  
13  
14  
15  
16  
17  
18  
19  
20  
21  
22  
23  
24  
25  
26  
27  
28  
29  
30  
31  
32  
33  
34  
35  
36  
37  
38  
39  
40  
41  
42  
43  
44  
45  
46  
47  
48  
49  
50  
51  
52  
53  
54  
55  
56  
57  
58  
59  
60

**Figure legends**

Figure 1: Trial flow diagram

Figure 2: Study schedule

For peer review only



Figure 1. Trial flow diagram

Trial flow diagram

234x301mm (300 x 300 DPI)



| TIME POINT (W, week)                               | Study Period |            |             |           |        |
|----------------------------------------------------|--------------|------------|-------------|-----------|--------|
|                                                    | Baseline     | Allocation | Treatment   | Follow-up |        |
|                                                    |              |            | W 4±2d      | W 8±3d    | W16±3d |
| <b>Enrollment</b>                                  |              |            |             |           |        |
| Eligibility criteria                               | ×            |            |             |           |        |
| Demography characteristics                         | ×            |            |             |           |        |
| Disease history of chronic plantar fasciitis       | ×            |            |             |           |        |
| Eligibility screen                                 | ×            |            |             |           |        |
| Informed consent                                   | ×            |            |             |           |        |
| Allocation                                         |              | ×          |             |           |        |
| <b>Interventions</b>                               |              |            |             |           |        |
| Acupuncture                                        |              |            | ×(weeks1-4) |           |        |
| Sham acupuncture                                   |              |            | ×(weeks1-4) |           |        |
| Waitlist control (no treatment)                    |              |            | ×(weeks1-4) |           |        |
| <b>Assessments</b>                                 |              |            |             |           |        |
| Worst pain intensity at first steps in the morning | ×            |            | ×           | ×         | ×      |
| Mean pain intensity during the day                 | ×            |            | ×           | ×         | ×      |
| Pressure pain threshold                            | ×            |            | ×           | ×         | ×      |
| Ankle range of motion                              | ×            |            | ×           | ×         | ×      |
| Foot and Ankle Ability Measure                     | ×            |            | ×           | ×         | ×      |
| Plantar fascia thickness                           | ×            |            | ×           |           |        |
| Participant global improvement assessment          |              |            | ×           | ×         | ×      |
| Participants' expectation towards acupuncture      | ×            |            |             |           |        |
| Blinding assessment                                |              |            |             |           |        |
| Adverse events                                     |              |            | ×           | ×         | ×      |
| Safety assessment                                  |              |            | ×           | ×         | ×      |

Figure 2: study schedule

Study schedule

199x194mm (300 x 300 DPI)

Table 1

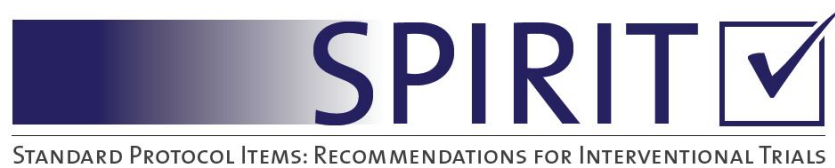

SPIRIT 2013 Checklist: Recommended items to address in a clinical trial protocol and related documents\*

| Section/item                      | Item No | Description                                                                                                                                                                                                                                                                              | Addressed on page number |
|-----------------------------------|---------|------------------------------------------------------------------------------------------------------------------------------------------------------------------------------------------------------------------------------------------------------------------------------------------|--------------------------|
| <b>Administrative information</b> |         |                                                                                                                                                                                                                                                                                          |                          |
| Title                             | 1       | Descriptive title identifying the study design, population, interventions, and, if applicable, trial acronym                                                                                                                                                                             | 1                        |
| Trial registration                | 2a      | Trial identifier and registry name. If not yet registered, name of intended registry                                                                                                                                                                                                     | 4                        |
|                                   | 2b      | All items from the World Health Organization Trial Registration Data Set                                                                                                                                                                                                                 | NA                       |
| Protocol version                  | 3       | Date and version identifier                                                                                                                                                                                                                                                              | 3                        |
| Funding                           | 4       | Sources and types of financial, material, and other support                                                                                                                                                                                                                              | 19                       |
| Roles and responsibilities        | 5a      | Names, affiliations, and roles of protocol contributors                                                                                                                                                                                                                                  | 1,19                     |
|                                   | 5b      | Name and contact information for the trial sponsor                                                                                                                                                                                                                                       | 1                        |
|                                   | 5c      | Role of study sponsor and funders, if any, in study design; collection, management, analysis, and interpretation of data; writing of the report; and the decision to submit the report for publication, including whether they will have ultimate authority over any of these activities | 19                       |
|                                   | 5d      | Composition, roles, and responsibilities of the coordinating centre, steering committee, endpoint adjudication committee, data management team, and other individuals or groups overseeing the trial, if applicable (see Item 21a for data monitoring committee)                         | NA                       |

## Introduction

|                          |    |                                                                                                                                                                                                           |     |
|--------------------------|----|-----------------------------------------------------------------------------------------------------------------------------------------------------------------------------------------------------------|-----|
| Background and rationale | 6a | Description of research question and justification for undertaking the trial, including summary of relevant studies (published and unpublished) examining benefits and harms for each intervention        | 4-5 |
|                          | 6b | Explanation for choice of comparators                                                                                                                                                                     | 4-5 |
| Objectives               | 7  | Specific objectives or hypotheses                                                                                                                                                                         | 5   |
| Trial design             | 8  | Description of trial design including type of trial (eg, parallel group, crossover, factorial, single group), allocation ratio, and framework (eg, superiority, equivalence, noninferiority, exploratory) | 5   |

## Methods: Participants, interventions, and outcomes

|                      |     |                                                                                                                                                                                                                                                                                                                                                                                |       |
|----------------------|-----|--------------------------------------------------------------------------------------------------------------------------------------------------------------------------------------------------------------------------------------------------------------------------------------------------------------------------------------------------------------------------------|-------|
| Study setting        | 9   | Description of study settings (eg, community clinic, academic hospital) and list of countries where data will be collected. Reference to where list of study sites can be obtained                                                                                                                                                                                             | 6     |
| Eligibility criteria | 10  | Inclusion and exclusion criteria for participants. If applicable, eligibility criteria for study centres and individuals who will perform the interventions (eg, surgeons, psychotherapists)                                                                                                                                                                                   | 7-8   |
| Interventions        | 11a | Interventions for each group with sufficient detail to allow replication, including how and when they will be administered                                                                                                                                                                                                                                                     | 8-10  |
|                      | 11b | Criteria for discontinuing or modifying allocated interventions for a given trial participant (eg, drug dose change in response to harms, participant request, or improving/worsening disease)                                                                                                                                                                                 | 14    |
|                      | 11c | Strategies to improve adherence to intervention protocols, and any procedures for monitoring adherence (eg, drug tablet return, laboratory tests)                                                                                                                                                                                                                              | 10    |
|                      | 11d | Relevant concomitant care and interventions that are permitted or prohibited during the trial                                                                                                                                                                                                                                                                                  | 10    |
| Outcomes             | 12  | Primary, secondary, and other outcomes, including the specific measurement variable (eg, systolic blood pressure), analysis metric (eg, change from baseline, final value, time to event), method of aggregation (eg, median, proportion), and time point for each outcome. Explanation of the clinical relevance of chosen efficacy and harm outcomes is strongly recommended | 11-13 |

|                      |    |                                                                                                                                                                                       |          |
|----------------------|----|---------------------------------------------------------------------------------------------------------------------------------------------------------------------------------------|----------|
| Participant timeline | 13 | Time schedule of enrolment, interventions (including any run-ins and washouts), assessments, and visits for participants. A schematic diagram is highly recommended (see Figure)      | Figure 2 |
| Sample size          | 14 | Estimated number of participants needed to achieve study objectives and how it was determined, including clinical and statistical assumptions supporting any sample size calculations | 14       |
| Recruitment          | 15 | Strategies for achieving adequate participant enrolment to reach target sample size                                                                                                   | 6        |

### Methods: Assignment of interventions (for controlled trials)

#### Allocation:

|                                  |     |                                                                                                                                                                                                                                                                                                                                                          |    |
|----------------------------------|-----|----------------------------------------------------------------------------------------------------------------------------------------------------------------------------------------------------------------------------------------------------------------------------------------------------------------------------------------------------------|----|
| Sequence generation              | 16a | Method of generating the allocation sequence (eg, computer-generated random numbers), and list of any factors for stratification. To reduce predictability of a random sequence, details of any planned restriction (eg, blocking) should be provided in a separate document that is unavailable to those who enrol participants or assign interventions | 6  |
| Allocation concealment mechanism | 16b | Mechanism of implementing the allocation sequence (eg, central telephone; sequentially numbered, opaque, sealed envelopes), describing any steps to conceal the sequence until interventions are assigned                                                                                                                                                | 6  |
| Implementation                   | 16c | Who will generate the allocation sequence, who will enrol participants, and who will assign participants to interventions                                                                                                                                                                                                                                | 6  |
| Blinding (masking)               | 17a | Who will be blinded after assignment to interventions (eg, trial participants, care providers, outcome assessors, data analysts), and how                                                                                                                                                                                                                | 6  |
|                                  | 17b | If blinded, circumstances under which unblinding is permissible, and procedure for revealing a participant's allocated intervention during the trial                                                                                                                                                                                                     | NA |

### Methods: Data collection, management, and analysis

|                         |     |                                                                                                                                                                                                                                                                                                                                                                                                              |   |
|-------------------------|-----|--------------------------------------------------------------------------------------------------------------------------------------------------------------------------------------------------------------------------------------------------------------------------------------------------------------------------------------------------------------------------------------------------------------|---|
| Data collection methods | 18a | Plans for assessment and collection of outcome, baseline, and other trial data, including any related processes to promote data quality (eg, duplicate measurements, training of assessors) and a description of study instruments (eg, questionnaires, laboratory tests) along with their reliability and validity, if known. Reference to where data collection forms can be found, if not in the protocol | 6 |
|-------------------------|-----|--------------------------------------------------------------------------------------------------------------------------------------------------------------------------------------------------------------------------------------------------------------------------------------------------------------------------------------------------------------------------------------------------------------|---|

|                     |     |                                                                                                                                                                                                                                                                   |       |
|---------------------|-----|-------------------------------------------------------------------------------------------------------------------------------------------------------------------------------------------------------------------------------------------------------------------|-------|
|                     | 18b | Plans to promote participant retention and complete follow-up, including list of any outcome data to be collected for participants who discontinue or deviate from intervention protocols                                                                         | 15    |
| Data management     | 19  | Plans for data entry, coding, security, and storage, including any related processes to promote data quality (eg, double data entry; range checks for data values). Reference to where details of data management procedures can be found, if not in the protocol | 15    |
| Statistical methods | 20a | Statistical methods for analysing primary and secondary outcomes. Reference to where other details of the statistical analysis plan can be found, if not in the protocol                                                                                          | 14-15 |
|                     | 20b | Methods for any additional analyses (eg, subgroup and adjusted analyses)                                                                                                                                                                                          | NA    |
|                     | 20c | Definition of analysis population relating to protocol non-adherence (eg, as randomised analysis), and any statistical methods to handle missing data (eg, multiple imputation)                                                                                   | 14-15 |

### Methods: Monitoring

|                 |     |                                                                                                                                                                                                                                                                                                                                       |       |
|-----------------|-----|---------------------------------------------------------------------------------------------------------------------------------------------------------------------------------------------------------------------------------------------------------------------------------------------------------------------------------------|-------|
| Data monitoring | 21a | Composition of data monitoring committee (DMC); summary of its role and reporting structure; statement of whether it is independent from the sponsor and competing interests; and reference to where further details about its charter can be found, if not in the protocol. Alternatively, an explanation of why a DMC is not needed | NA    |
|                 | 21b | Description of any interim analyses and stopping guidelines, including who will have access to these interim results and make the final decision to terminate the trial                                                                                                                                                               | 14    |
| Harms           | 22  | Plans for collecting, assessing, reporting, and managing solicited and spontaneously reported adverse events and other unintended effects of trial interventions or trial conduct                                                                                                                                                     | 13-14 |
| Auditing        | 23  | Frequency and procedures for auditing trial conduct, if any, and whether the process will be independent from investigators and the sponsor                                                                                                                                                                                           | 15    |

### Ethics and dissemination

|                          |    |                                                                                           |       |
|--------------------------|----|-------------------------------------------------------------------------------------------|-------|
| Research ethics approval | 24 | Plans for seeking research ethics committee/institutional review board (REC/IRB) approval | 16,19 |
|--------------------------|----|-------------------------------------------------------------------------------------------|-------|

|    |                   |     |                                                                                   |    |
|----|-------------------|-----|-----------------------------------------------------------------------------------|----|
| 1  |                   |     |                                                                                   |    |
| 2  |                   |     |                                                                                   |    |
| 3  |                   |     |                                                                                   |    |
| 4  |                   |     |                                                                                   |    |
| 5  | Protocol          | 25  | Plans for communicating important protocol modifications (eg, changes to          | 16 |
| 6  | amendments        |     | eligibility criteria, outcomes, analyses) to relevant parties (eg, investigators, |    |
| 7  |                   |     | REC/IRBs, trial participants, trial registries, journals, regulators)             |    |
| 8  |                   |     |                                                                                   |    |
| 9  | Consent or        | 26a | Who will obtain informed consent or assent from potential trial participants      | 6  |
| 10 | assent            |     | or authorised surrogates, and how (see Item 32)                                   |    |
| 11 |                   |     |                                                                                   |    |
| 12 |                   | 26b | Additional consent provisions for collection and use of participant data and      | NA |
| 13 |                   |     | biological specimens in ancillary studies, if applicable                          |    |
| 14 |                   |     |                                                                                   |    |
| 15 |                   |     |                                                                                   |    |
| 16 | Confidentiality   | 27  | How personal information about potential and enrolled participants will be        | 19 |
| 17 |                   |     | collected, shared, and maintained in order to protect confidentiality before,     |    |
| 18 |                   |     | during, and after the trial                                                       |    |
| 19 |                   |     |                                                                                   |    |
| 20 | Declaration of    | 28  | Financial and other competing interests for principal investigators for the       | 19 |
| 21 | interests         |     | overall trial and each study site                                                 |    |
| 22 |                   |     |                                                                                   |    |
| 23 |                   |     |                                                                                   |    |
| 24 | Access to         | 29  | Statement of who will have access to the final trial dataset, and disclosure      | 19 |
| 25 | data              |     | of contractual agreements that limit such access for investigators                |    |
| 26 |                   |     |                                                                                   |    |
| 27 | Ancillary and     | 30  | Provisions, if any, for ancillary and post-trial care, and for compensation to    | NA |
| 28 | post-trial care   |     | those who suffer harm from trial participation                                    |    |
| 29 |                   |     |                                                                                   |    |
| 30 | Dissemination     | 31a | Plans for investigators and sponsor to communicate trial results to               | 16 |
| 31 | policy            |     | participants, healthcare professionals, the public, and other relevant groups     |    |
| 32 |                   |     | (eg, via publication, reporting in results databases, or other data sharing       |    |
| 33 |                   |     | arrangements), including any publication restrictions                             |    |
| 34 |                   |     |                                                                                   |    |
| 35 |                   |     |                                                                                   |    |
| 36 |                   | 31b | Authorship eligibility guidelines and any intended use of professional            | 19 |
| 37 |                   |     | writers                                                                           |    |
| 38 |                   |     |                                                                                   |    |
| 39 |                   | 31c | Plans, if any, for granting public access to the full protocol, participant-level | NA |
| 40 |                   |     | dataset, and statistical code                                                     |    |
| 41 |                   |     |                                                                                   |    |
| 42 |                   |     |                                                                                   |    |
| 43 | <b>Appendices</b> |     |                                                                                   |    |
| 44 |                   |     |                                                                                   |    |
| 45 | Informed          | 32  | Model consent form and other related documentation given to participants          | NA |
| 46 | consent           |     | and authorised surrogates                                                         |    |
| 47 | materials         |     |                                                                                   |    |
| 48 |                   |     |                                                                                   |    |
| 49 | Biological        | 33  | Plans for collection, laboratory evaluation, and storage of biological            | NA |
| 50 | specimens         |     | specimens for genetic or molecular analysis in the current trial and for          |    |
| 51 |                   |     | future use in ancillary studies, if applicable                                    |    |
| 52 |                   |     |                                                                                   |    |
| 53 |                   |     |                                                                                   |    |
| 54 |                   |     |                                                                                   |    |
| 55 |                   |     |                                                                                   |    |
| 56 |                   |     |                                                                                   |    |
| 57 |                   |     |                                                                                   |    |
| 58 |                   |     |                                                                                   |    |
| 59 |                   |     |                                                                                   |    |
| 60 |                   |     |                                                                                   |    |

1  
2  
3  
4  
5 \*It is strongly recommended that this checklist be read in conjunction with the SPIRIT 2013 Explanation &  
6 Elaboration for important clarification on the items. Amendments to the protocol should be tracked and dated.  
7 The SPIRIT checklist is copyrighted by the SPIRIT Group under the Creative Commons "[Attribution-  
8 NonCommercial-NoDerivs 3.0 Unported](#)" license.  
9  
10  
11  
12  
13  
14  
15  
16  
17  
18  
19  
20  
21  
22  
23  
24  
25  
26  
27  
28  
29  
30  
31  
32  
33  
34  
35  
36  
37  
38  
39  
40  
41  
42  
43  
44  
45  
46  
47  
48  
49  
50  
51  
52  
53  
54  
55  
56  
57  
58  
59  
60

# BMJ Open

## Efficacy of acupuncture vs sham acupuncture or waitlist control for patients with chronic plantar fasciitis: study protocol for a 2-center randomized controlled trial

|                                 |                                                                                                                                                                                                                                                                                                                                                                                                                                                                                                                                                                                                                                                                                 |
|---------------------------------|---------------------------------------------------------------------------------------------------------------------------------------------------------------------------------------------------------------------------------------------------------------------------------------------------------------------------------------------------------------------------------------------------------------------------------------------------------------------------------------------------------------------------------------------------------------------------------------------------------------------------------------------------------------------------------|
| Journal:                        | <i>BMJ Open</i>                                                                                                                                                                                                                                                                                                                                                                                                                                                                                                                                                                                                                                                                 |
| Manuscript ID                   | bmjopen-2020-036773.R3                                                                                                                                                                                                                                                                                                                                                                                                                                                                                                                                                                                                                                                          |
| Article Type:                   | Protocol                                                                                                                                                                                                                                                                                                                                                                                                                                                                                                                                                                                                                                                                        |
| Date Submitted by the Author:   | 09-Aug-2020                                                                                                                                                                                                                                                                                                                                                                                                                                                                                                                                                                                                                                                                     |
| Complete List of Authors:       | Wang, Weiming; China Academy of Chinese Medical Sciences Guanganmen Hospital, Department of acupuncture<br>Liu, Sixing; Guizhou University Of Traditional Chinese Medicine, School of Acupuncture-Moxibustion and Tuina,<br>Liu, Yan<br>Zang, Zhiwei; Yantai hospital of traditional chinese medicine, Department of Acupuncture<br>Zhang, Weina; China Academy of Traditional Chinese Medicine Guanganmen Hospital, Department of Acupuncture<br>Li, Liang; China Academy of Chinese Medical Sciences Guanganmen Hospital, Department of Ultrasound<br>Liu, zhishun; China Academy of Traditional Chinese Medicine Guanganmen Hospital, acupuncture and moxibustion department |
| <b>Primary Subject Heading</b>: | Medical management                                                                                                                                                                                                                                                                                                                                                                                                                                                                                                                                                                                                                                                              |
| Secondary Subject Heading:      | Complementary medicine                                                                                                                                                                                                                                                                                                                                                                                                                                                                                                                                                                                                                                                          |
| Keywords:                       | COMPLEMENTARY MEDICINE, PAIN MANAGEMENT, Clinical trials < THERAPEUTICS                                                                                                                                                                                                                                                                                                                                                                                                                                                                                                                                                                                                         |
|                                 |                                                                                                                                                                                                                                                                                                                                                                                                                                                                                                                                                                                                                                                                                 |

SCHOLARONE™  
Manuscripts





I, the Submitting Author has the right to grant and does grant on behalf of all authors of the Work (as defined in the below author licence), an exclusive licence and/or a non-exclusive licence for contributions from authors who are: i) UK Crown employees; ii) where BMJ has agreed a CC-BY licence shall apply, and/or iii) in accordance with the terms applicable for US Federal Government officers or employees acting as part of their official duties; on a worldwide, perpetual, irrevocable, royalty-free basis to BMJ Publishing Group Ltd ("BMJ") its licensees and where the relevant Journal is co-owned by BMJ to the co-owners of the Journal, to publish the Work in this journal and any other BMJ products and to exploit all rights, as set out in our [licence](#).

The Submitting Author accepts and understands that any supply made under these terms is made by BMJ to the Submitting Author unless you are acting as an employee on behalf of your employer or a postgraduate student of an affiliated institution which is paying any applicable article publishing charge ("APC") for Open Access articles. Where the Submitting Author wishes to make the Work available on an Open Access basis (and intends to pay the relevant APC), the terms of reuse of such Open Access shall be governed by a Creative Commons licence – details of these licences and which [Creative Commons](#) licence will apply to this Work are set out in our licence referred to above.

Other than as permitted in any relevant BMJ Author's Self Archiving Policies, I confirm this Work has not been accepted for publication elsewhere, is not being considered for publication elsewhere and does not duplicate material already published. I confirm all authors consent to publication of this Work and authorise the granting of this licence.

1  
2  
3 1 Title page  
4  
5 2  
6  
7 3 Article title:  
8  
9

10 4 **Efficacy of acupuncture vs sham acupuncture or waitlist control for**  
11  
12  
13 5 **patients with chronic plantar fasciitis: study protocol for a 2-center**  
14  
15 6 **randomized controlled trial**

17 7 Weiming Wang, MD, PhD<sup>1\*</sup>; Sixing Liu, BS<sup>2\*</sup>; Yan Liu, MD<sup>3\*</sup>; Zhiwei Zang, MD<sup>4</sup>;  
18 8 Weina Zhang, BS<sup>1</sup>; Liang Li, MD<sup>5</sup>; Zhishun Liu, MD, PhD<sup>1†</sup>  
19  
20  
21  
22

23  
24 10 1 Department of Acupuncture, Guang'anmen Hospital, China Academy of Chinese  
25 11 Medical Sciences, Beijing, China

26  
27 12 2 School of Acupuncture–Moxibustion and Tuina, Guizhou University of Traditional  
28 13 Chinese Medicine, Guiyang, China

29  
30 14 3 Key Laboratory of Chinese Internal Medicine of Ministry of Education,  
31 15 Dongzhimen Hospital, Beijing University of Chinese Medicine, Beijing, China

32  
33 16 4 Department of Acupuncture, Yantai Hospital of Traditional Chinese Medicine,  
34 17 Yantai, China

35  
36 18 5 Department of Ultrasound, Guang'anmen Hospital, China Academy of Chinese  
37 19 Medical Sciences, Beijing, China  
38  
39  
40  
41  
42

43 20  
44 21 \*These authors contributed equally to this work.  
45  
46

47 22 †Corresponding author: Department of Acupuncture and Moxibustion, Guang' an  
48 23 Men Hospital, China Academy of Chinese Medical Sciences, No.5 Beixiang St.,  
49 24 Xicheng District, Beijing, China, Email: zhishunjournal@163.com.  
50  
51  
52

53 25 **Running title:** acupuncture for chronic plantar fasciitis  
54  
55  
56

57 27 **Word count: abstract 268; main text 4203.**  
58  
59  
60

1  
2  
3  
4 29 **Abstract**

5  
6 30 **Introduction:** Plantar fasciitis (PF) is reported to be the most common cause of  
7  
8  
9 31 plantar heel pain. Acupuncture has been used for patients experiencing PF, but  
10  
11  
12 32 evidence of the efficacy of acupuncture on PF is limited. The primary objective of this  
13  
14  
15 33 trial is to compare combined acupuncture and sham acupuncture (SA) versus waitlist  
16  
17  
18 34 control for improving the level of pain experienced by patients suffering from chronic  
19  
20 35 PF.

21  
22 36 **Methods and Analysis:** This will be a two-center, parallel-group, sham and  
23  
24  
25 37 no-treatment controlled, assessor-blinded randomized trial. We will randomly allocate  
26  
27  
28 38 120 participants with chronic PF to acupuncture, SA, and waitlist control groups at a  
29  
30  
31 39 ratio of 2:1:1. Participants in the acupuncture and SA groups will receive a 30-minute  
32  
33  
34 40 acupuncture or SA treatment for a total of 12 sessions over 4 weeks, with a 12-week  
35  
36  
37 41 follow-up. Participants in the waitlist control group will not undergo treatment for a  
38  
39  
40 42 period of 16 weeks but instead will have the option of 4 weeks (12 sessions) of  
41  
42  
43 43 acupuncture free of charge at the end of the follow-up period. The primary outcome  
44  
45  
46 44 will be the treatment response rate 4 weeks after randomization, assessed as a  
47  
48  
49 45 minimum of 50% improvement in the worst pain intensity during the first steps in the  
50  
51  
52 46 morning compared with the baseline. All analyses will be performed with a 2-sided *P*  
53  
54  
55 47 value of  $< 0.05$  considered significant following the intention-to-treat principle.

56  
57 48 **Ethics and Dissemination:** The study has been approved by the Ethical Committee  
58  
59 49 of the Guang'anmen Hospital, China Academy of Chinese Medical Sciences  
60  
50 50 (approval No: 2019-210-KY). The results will be disseminated through presentation

1  
2  
3  
4 51 at a peer-reviewed medical journal, the relevant conferences and scientific meetings.  
5

6  
7 52 **Key words:** acupuncture; chronic plantar fasciitis; pain intensity; clinical trial  
8

9  
10 53 **Trial registration:** ClinicalTrials.gov identifier: NCT 04185259.  
11

12 54 **Strengths and limitations of this study:**  
13

14 55 ▶ This study is the first randomized controlled trial comparing combined  
15  
16 56 acupuncture and sham acupuncture versus waitlist control for pain relief in  
17  
18 57 participants with chronic PF.  
19

20  
21  
22 58 ▶ The advantages to this study include sham acupuncture and waitlist control design,  
23  
24 59 objective measurements (i.e. PPT, PFT), strict quality control and evaluation of  
25  
26 60 participants' expectation regarding acupuncture.  
27

28  
29  
30 61 ▶ The 2:1:1 allocation ratio used in this trial could facilitate recruitment and enhance  
31  
32 62 patient adherence by allowing more patients to receive acupuncture.  
33

34  
35 63 ▶ Acupuncturists and participants in the waitlist control group will not be blinded,  
36  
37 64 which may cause bias.  
38

39  
40 65 ▶ A high dropout rate may exist in the waitlist group because participants expect to  
41  
42 66 receive acupuncture treatment when they join the trial.  
43  
44

45 67  
46

47  
48 68  
49  
50  
51  
52  
53  
54  
55  
56  
57  
58  
59  
60

## 69 **Background**

70 Plantar fasciitis (PF), which presents with heel pain and tenderness particularly at the  
71 plantar aspect of the calcaneal tuberosity <sup>1</sup> upon the initiation of weight bearing, is  
72 one of the most prevalent complaints encountered by foot and ankle specialists. It is  
73 reported that 1 in 10 people suffer from inferior heel pain within their lifetime <sup>2</sup> and  
74 this condition is attributed to PF in 80% of cases.<sup>3</sup> PF predominantly affects elderly  
75 and middle-aged individuals <sup>4</sup> and is more frequent in runners or those whose  
76 employment requires standing.<sup>5</sup> The exact etiology of PF is multifactorial and not  
77 completely understood. Physical-mechanical overload and micro tears within the  
78 fascia <sup>6</sup> could be involved in the development of PF, resulting in localized  
79 inflammation and degeneration of the proximal plantar aponeurosis.<sup>7</sup>

80 The available treatment options for PF mainly include non-operative treatments  
81 (e.g., plantar fascia and gastrocnemius soleus muscle stretching, heel cups, arch  
82 supports, night splints, shockwave therapy, nonsteroidal antiinflammatory drugs  
83 (NSAIDs), local corticosteroid injections), and operative management.<sup>8</sup> However, no  
84 consensus has been reached regarding the most beneficial treatment method for PF.<sup>9</sup>  
85 Although conservative treatment of PF is successful in the vast majority of cases <sup>10</sup>  
86 and many PF cases are self-limiting and eventually enter remission, it can take up to  
87 months or even years for patients to recover.<sup>11</sup> Moreover, approximately 10 to 20% of  
88 patients are recalcitrant to conventional treatments, resulting in foot pain and/or  
89 disabilities for years.<sup>12</sup>

90 Acupuncture, an integral part of traditional Chinese medicine (TCM), is a  
91 technique whereby the acupoints located on specific body areas are pierced with fine  
92 needles for therapeutic purposes based on the principles of TCM.<sup>13</sup> Acupuncture has  
93 been used in the management of PF and other musculoskeletal pain-related conditions

1  
2  
3 94 for thousands of years. Mechanistic studies have revealed that acupuncture can induce  
4  
5 95 an analgesic response via the release of neuropeptides (e.g., enkephalin, dynorphin,  
6  
7 96  $\beta$ -endorphin, and endomorphin).<sup>14</sup> Two recent systematic reviews <sup>15,16</sup> found that  
8  
9 97 acupuncture may reduce pain intensity and improve plantar function for patients with  
10  
11 98 PF. However, there were methodological problems with the small sample sizes, lack  
12  
13 99 of control with a placebo/waitlist group, or no adjustment for the confounding effects  
14  
15 100 of patients who received combination treatments in the design of the included  
16  
17 101 acupuncture literature. Therefore, the placebo effects of acupuncture and spontaneous  
18  
19 102 remission of PF cannot be excluded and the beneficial effects of acupuncture for PF  
20  
21 103 remain in need of further assessment.

22  
23  
24  
25  
26 104 We designed a randomized controlled trial to evaluate the efficacy of acupuncture,  
27  
28 105 compared with sham acupuncture (SA) or being on a waitlist control group, for  
29  
30 106 patients with chronic PF for >6 months. Given that clinical and experimental results  
31  
32 107 have shown that SA can induce a significant alleviation of pain similar to verum  
33  
34 108 acupuncture <sup>17</sup>due to non-specific effects (e.g., acupuncture expectations), the primary  
35  
36 109 hypothesis in this trial was that combined acupuncture and SA will result in larger  
37  
38 110 improvements in heel pain than no acupuncture treatment in patients with chronic PF.  
39  
40 111 The secondary hypothesis examined whether acupuncture can reduce heel pain  
41  
42 112 intensity more effectively than SA or no acupuncture.

## 43 113 **Methods and design**

### 44 114 **Study design**

45  
46  
47 115 This will be a two-center, parallel-group, sham and no-treatment controlled,  
48  
49 116 assessor-blinded randomized trial comprising three arms with a 2:1:1 allocation rate.  
50  
51 117 We will design the protocol in accordance with standard protocol items including the  
52  
53 118 Recommendations for Interventional Trials <sup>18</sup> and the Standards for Reporting  
54  
55  
56  
57  
58  
59  
60

1  
2  
3 119 Interventions in the Clinical Trials of Acupuncture<sup>19</sup> guidelines. The study flow chart  
4  
5  
6 120 and study schedule are shown in Figs. 1 and 2.

### 7 8 121 **Study setting and recruitment**

9  
10 122 This trial is planned to be conducted at Guang'anmen Hospital, China Academy of  
11  
12 123 Chinese Medical Sciences, and Yantai Hospital of Traditional Chinese Medicine from  
13  
14 124 March 2020 to March 2022. A total of 120 participants will be publicly recruited  
15  
16  
17 125 through the use of posters and hospital webs in the two participating hospitals. The  
18  
19 126 duration of the trial for each participant will be 17 weeks: 1-week baseline, 4-week  
20  
21  
22 127 treatment, and 12-week follow-up.

### 23 24 128 **Randomization and Blinding**

25  
26 129 The eligible participants who sign an informed consent form will complete a 1-week  
27  
28 130 baseline assessment before randomization, which includes foot symptoms (i.e., worst  
29  
30 131 pain intensity at first steps in the morning, mean pain intensity during the day),  
31  
32 132 functionality, and ultrasound examinations (see Fig. 2). Participants' expectation  
33  
34 133 towards acupuncture will be assessed in the acupuncture and SA groups at baseline by  
35  
36 134 asking participants: Do you think acupuncture will be helpful to improve your chronic  
37  
38 135 PF? Participant will choose one of the following answers: "Extremely helpful", "Very  
39  
40 136 helpful", "Helpful", "Not help at all", and "Unclear". Participants will be randomized  
41  
42 137 into the acupuncture group, SA group, or waitlist (no acupuncture) group at a ratio of  
43  
44 138 2:1:1 using simple randomization. Randomization will be generated with the PROC  
45  
46 139 PLAN in SAS 9.4 (SAS Institute Inc., Cary, NC, USA). Details of the group  
47  
48 140 allocation will be concealed on cards inside sealed opaque envelopes by the staff  
49  
50 141 member responsible for the allocation. A research coordinator, who will not be  
51  
52 142 involved in the treatment and outcome assessments, will be responsible for contacting  
53  
54 143 participants and allocating them to their assigned group. Participants in the  
55  
56  
57  
58  
59  
60

1  
2  
3 144 acupuncture and SA groups, together with efficacy evaluators and data analysts will  
4  
5 145 be blinded to the group assignments. Participants in the waitlist control group and  
6  
7  
8 146 acupuncturists will not be blinded.  
9

### 10 147 **Participants**

11  
12 148 Participants with a diagnosis of PF by an orthopedist on clinical grounds will be  
13  
14 149 included in the study only if they meet all of the following inclusion criteria and do  
15  
16  
17 150 not fulfill any of the exclusion criteria. Diagnosis of PF will be made according to the  
18  
19 151 guidelines described by the Orthopaedic Section of American Physical Therapy  
20  
21 152 Association.<sup>20</sup> The following clinical findings will be used to diagnose PF: plantar  
22  
23 153 medial heel pain during the initial steps after a period of inactivity but also worse pain  
24  
25 154 following prolonged weight bearing, heel pain precipitated by a recent increase in  
26  
27 155 weight-bearing activity, physical examination findings (heel pain with palpation of  
28  
29 156 the proximal insertion of the plantar fascia, limited ankle range of motion,), abnormal  
30  
31 157 foot posture index, high body mass index, as well as a positive windlass test and  
32  
33 158 negative tarsal tunnel tests.  
34  
35  
36

### 37 159 **Inclusion criteria:**

- 38 160 1. Age  $\geq 18$  years and  $\leq 75$  years;
- 39 161 2. History of plantar medial heel pain for at least 6 months before enrolment;
- 40 162 3. Reported an average worst pain intensity at first steps in the morning over the last  
41  
42 163 7 days of at least 50 mm on a 100-mm visual analog scale (VAS) before  
43  
44 164 enrolment;
- 45 165 4. Failure to respond to conservative treatment for  $\geq 1$  months, including any of the  
46  
47 166 following modalities: stretching exercises, nonsteroidal anti-inflammatory drugs,  
48  
49 167 shockwave therapy, dry needling and orthotics;
- 50  
51 168 5. Ability to comply with the study protocol, understand the medical information  
52  
53  
54  
55  
56  
57  
58  
59  
60



1  
2  
3 169 forms as well as having provided informed consent.  
4

5 170 **Exclusion criteria:**  
6

- 7  
8 171 1. History of calcaneus fracture, calcaneal bone tumor or cyst, plantar fascia rupture,  
9  
10 172 or having a significant foot deformity (clubfoot, pes cavus, or pes  
11  
12 173 calcaneovalgus);  
13  
14 174 2. Previous injection (corticosteroid, platelet-rich plasma, lidocaine needling), or  
15  
16 175 radiation, or surgery to plantar fascia within 6 months preceding enrollment;  
17  
18 176 3. Lumbosacral radiculopathy or peripheral neuropathy around the ankle joint such  
19  
20 177 as nerve entrapment tarsal tunnel syndrome or Achilles tendinopathy;  
21  
22 178 4. Systemic disorders like rheumatoid arthritis, gout, Reiter syndrome, type 1 or 2  
23  
24 179 diabetes mellitus, osteoporosis, spondyloarthritis, or osteomyelitis;  
25  
26 180 5. Joint, bone, or skin infection in the affected foot;  
27  
28 181 6. Clinically significant cardiovascular disorder, severe hepatic/renal insufficiency or  
29  
30 182 coagulation disorder at baseline as determined by the investigator;  
31  
32 183 7. Known phobia to acupuncture or receiving acupuncture treatment within 4 weeks  
33  
34 184 prior to enrollment.  
35  
36  
37  
38  
39

40 185 **Interventions**

41  
42 186 **Acupuncture group**  
43

44 187 The acupuncture protocol was developed by the consensus of three experts based on  
45  
46 188 the meridian theory of TCM and was used in our previous trial.<sup>21</sup> Licensed  
47  
48 189 acupuncturists with more than 2 years of acupuncture experience will perform the  
49  
50 190 treatment. We will apply needles to two Ashi points (the two most severe tender  
51  
52 191 points in the most sensitive area over the anteromedial aspect of the heels, according  
53  
54 192 to the participant's perceived pain upon palpation) as well as the Chengshan (BL57),  
55  
56 193 Taixi (KI3), and Kunlun (BL60) acupoints in this trial. The position of the  
57  
58  
59  
60

1  
2  
3 194 aforementioned acupoints will be based on the Nomenclature and location of  
4  
5 195 acupuncture points <sup>22</sup> designated by the National Standard of the People's Republic of  
6  
7 196 China (GB/T 12 346-2006). Sterile disposable stainless steel needles (Hwato brand,  
8  
9 197 Suzhou Medical Appliance Factory, Suzhou, China; 0.3 mm × 40 mm) will be used.  
10  
11  
12 198 With the patient in a prone position, the local skin will be routinely sterilized,  
13  
14 199 followed by pasting a 10-mm diameter and 5-mm thick sterile adhesive pad (Hwato  
15  
16 200 brand, Suzhou Medical Appliance Factory, Suzhou, China) onto each selected  
17  
18 201 acupoint. Ashi points will be perpendicularly inserted through the pad to the plantar  
19  
20 202 fascia layer with a depth of approximately 15-20 mm depending on the location.  
21  
22 203 BL57, KI3, and BL60 will be punched perpendicularly 10-15 mm deep into the skin  
23  
24 204 through the pad. All needles except the Ashi points will be manually stimulated with  
25  
26 205 small, equal manipulations of lifting, thrusting, twirling, and rotating to achieve De qi  
27  
28 206 (a sensation including soreness, numbness, distention, and heaviness).<sup>23</sup> Needles will  
29  
30 207 be retained for 30 minutes per treatment. During each treatment, every needle will be  
31  
32 208 manipulated three times every 10 minutes.

### 37 209 **SA group**

38  
39  
40 210 In the SA group, sham Ashi (0.5 cun away from Ashi, one 'cun' is equivalent to the  
41  
42 211 greatest width of the individual patients' thumb, ~1.5 cm), sham BL57 (0.5 cun lateral  
43  
44 212 to the true BL57 horizontally), sham KI3 (midway between the true KI3 and the  
45  
46 213 heel tendon) and sham BL60 (midway between the true BL60 and the heel tendon)  
47  
48 214 will be used. The treatment protocol will be similar to that of the acupuncture group.  
49  
50 215 The Hwato-brand disposable blunt-tipped needles (size 0.30 × 25 mm) will be  
51  
52 216 inserted at the sham points through the adhesive pads attached to the skin without skin  
53  
54 217 penetration. The needles will then be lifted, thrust, twirled, and rotated evenly three  
55  
56 218 times every 10 minutes. No specific De qi response will be elicited.  
57  
58  
59  
60

1  
2  
3 219 **Waitlist control group**  
4

5 220 Participants will receive no treatment for their heel pain for a period of 16 weeks after  
6  
7 221 randomization, and subsequently have the option of 4 weeks (12 sessions) of  
8  
9 222 acupuncture free of charge at the end of the follow-up period.

10  
11  
12 223 The intervention will last for 30 minutes in the acupuncture and SA groups, and  
13  
14 224 will be performed three times per week for a total of 12 sessions in four consecutive  
15  
16 225 weeks. If participants suffer pain bilaterally, the acupuncturists will treat both sides  
17  
18 226 and evaluate the more severe side. Participants in all groups will be treated and (or)  
19  
20 227 evaluated separately. Participants in all groups will be advised to use soft heel foot  
21  
22 228 wear, not to stand for a long time, and not to walk barefoot during the 17-week study  
23  
24 229 period.

25  
26  
27  
28 230 **Rescue medication**  
29

30 231 Additional therapies for heel pain during the entire study period will be prohibited.  
31  
32 232 However, the investigator will be permitted to prescribe ibuprofen (sustained release  
33  
34 233 type, 300 mg/T, Tianjin Smith Kline & French Laboratories Ltd., Tianjin, China) as  
35  
36 234 rescue medication no more than 2 days per week up to the maximum daily dose if  
37  
38 235 unbearable heel pain occurs. Participants will be required not to take rescue  
39  
40 236 medication within 72 h before the baseline and outcome measurements. In the event  
41  
42 237 rescue medication needs to be taken after the baseline measurement, the participant  
43  
44 238 will postpone the next visit to the treatment center.

45  
46  
47  
48 239 **Outcome measures**  
49

50  
51 240 **Primary outcome**  
52

53 241 The primary outcome used in this trial will be the proportion of participants with a  
54  
55 242 treatment response 4 weeks after randomization, defined as a minimum of 50%  
56  
57 243 improvement in the worst pain intensity during the first steps in the morning  
58  
59  
60

1  
2  
3 244 compared with the baseline. The average worst pain intensity over the last 3 days will  
4  
5 245 be used for analysis in this trial. Pain intensity will be measured using a 0-100 VAS,  
6  
7 246 with 0 indicating no pain and 100 indicating maximal pain. Participants who must  
8  
9 247 resort to additional treatments other than rescue medication will be classified as  
10  
11 248 nonresponders. In addition, the responder rate at weeks 8 and weeks 16 will also be  
12  
13 249 assessed.  
14  
15

### 16 250 **Secondary outcomes**

17  
18  
19 251 The secondary outcomes are as follows:  
20

- 21 252 1. Changes in the VAS score for worst pain intensity during the first steps in the  
22  
23 253 morning from baseline to 4, 8, and 16 weeks after randomization;
- 24  
25 254 2. Changes in the VAS score for mean pain intensity during the day from baseline to  
26  
27 255 4, 8, and 16 weeks after randomization;
- 28  
29 256 3. Changes in the pressure pain threshold (PPT) at the most painful area from  
30  
31 257 baseline to 4, 8, and 16 weeks after randomization. PPT is defined as the  
32  
33 258 minimum pressure detected when the sensation of pressure first changes to a  
34  
35 259 sensation of pain.<sup>24</sup> PPT will be tested with a pressure algometer (Fabrication  
36  
37 260 Enterprises, Inc., White Plains, NY; from 1 kg/cm<sup>2</sup> to 5 kg/cm<sup>2</sup>) using a metal  
38  
39 261 probe with a 0.5 cm<sup>2</sup> rubber disc by a trained researcher. PPT will be measured  
40  
41 262 when the participant is lying supine in a relaxed position with the affected foot  
42  
43 263 hanging over the edge of the bed. When measuring the PPT, the rubber disc will  
44  
45 264 be placed perpendicularly on the painful spot and pressure will be applied at a rate  
46  
47 265 of approximately 0.1 kg/cm<sup>2</sup>/s through the metal probe of the pressure algometer.  
48  
49 266 Participants will be informed to report when the initial pain sensation occurs, and  
50  
51 267 the readings of the algometer will be recorded. The score will be determined by  
52  
53 268 averaging three repeated measurements with 30 seconds between each trial. All  
54  
55  
56  
57  
58  
59  
60

- 1  
2  
3 269 values below 1 kg/cm<sup>2</sup> will be reported as 0.5 kg/cm<sup>2</sup>.  
4  
5  
6 270 4. Changes in the ankle range of motion (AROM) from baseline to 4, 8, and 16  
7  
8 271 weeks after randomization: The examiner will measure the AROM including  
9  
10 272 dorsiflexion and plantar flexion in 2 positions (flexed knee and extended knee)  
11  
12 273 using a digital goniometer (Tangxia Electronic Instrument Factory, Dongguan,  
13  
14 274 from 0° to 360°). For the flexed-knee assessment, the participant will sit in a  
15  
16  
17 275 relaxed station with the popliteal space at the edge of the table and their knees  
18  
19 276 with 90° of flexion. For the extended-knee assessment, the participant will be  
20  
21 277 seated on a treatment table with the knees fully extended (0°) and the feet hanging  
22  
23  
24 278 off the end of the table. The axis of the goniometer will be placed at the lateral  
25  
26 279 malleolus. The stationary arm will be placed parallel to the fifth metatarsal and the  
27  
28  
29 280 moving arm placed parallel to the center of the fibular head. The ankle will be  
30  
31 281 passively moved from a neutral starting position into dorsiflexion and plantar  
32  
33 282 flexion until a firm end feel is elicited<sup>25</sup> and the readings of the goniometer will  
34  
35 283 be registered. The mean score of three trials with 10 seconds between each  
36  
37 284 examination will be calculated and used for analysis.  
38  
39  
40 285 5. Changes in the Foot and Ankle Ability Measure (FAAM) total score and subscale  
41  
42 286 scores from baseline to 4, 8, and 16 weeks after randomization: The FAAM is a  
43  
44 287 self-reported questionnaire concerning 21 activities of daily living (ADL) items  
45  
46  
47 288 and eight sports subscale items.<sup>26</sup> Each item is scored on a 0-4 point Likert scale  
48  
49 289 anchored by 0 (unable to do) and 4 (no difficulty at all), with higher total scores  
50  
51 290 indicating a higher level of function. The FAAM has a maximum potential score  
52  
53 291 of 116 (84 ADL and 32 sport subscales). The obtained score (total, ADL, and  
54  
55 292 sport subscale scores) is divided by the maximum potential score and multiplied  
56  
57  
58 293 by 100 to obtain a percentage. If the patient does not respond, the specific  
59  
60

1  
2  
3 294 question will be left blank and not be a part of the final value of the questionnaire.  
4

5 295 In this trial, we will use the previously validated Chinese version of the FAAM.<sup>27</sup>  
6

7  
8 296 6. Change in plantar fascia thickness (PFT) from baseline to 4 weeks after  
9  
10 297 randomization: PFT will be measured at the thickest point closest to the calcaneal  
11  
12 298 insertion in its medial portion using ultrasound. The ultrasound scan will be  
13  
14 299 performed using an 8-12 MHz linear probe with the patient in the prone position  
15  
16 300 at the baseline and at 4 weeks after randomization.  
17

18  
19 301 7. Participant global assessment of improvement: Participants will be asked to rate  
20  
21 302 their global improvement using a 7-point scale. The improvement will be scaled  
22  
23 303 from 1 (complete recovery) to 7 (vastly worse), with 2 being obvious  
24  
25 304 improvement, 3 being a little improvement, 4 being no change, 5 being a little  
26  
27 305 worse, and 6 being obviously worse. The proportions of participants with different  
28  
29 306 degrees of improvement will be assessed at 4, 8, and 16 weeks after  
30  
31 307 randomization. Scales of participant global assessment of improvement with 7  
32  
33 308 response categories have been rated as relatively easy to use and show good  
34  
35 309 reliability and validity.<sup>28</sup>  
36  
37  
38  
39

40 310 8. Participants' expectation towards acupuncture at baseline: At baseline,  
41  
42 311 participants in the acupuncture and SA groups will be asked the following  
43  
44 312 question: "Do you think acupuncture will be helpful to improve your chronic PF?"  
45  
46 313 Participant will choose one of the following answers: "Extremely helpful", "Very  
47  
48 314 helpful", "Helpful", "Not help at all", and "Unclear".  
49

50  
51 315 9. The proportion of participants who have maintained blinding during treatment in  
52  
53 316 the acupuncture and SA groups: Participants' blindness to the mode of  
54  
55 317 acupuncture will be assessed five minutes after the end of any treatment in the  
56  
57 318 fourth week by asking the patients the following question: "Which of the two  
58  
59  
60

1  
2  
3 319 acupuncture modalities do you think you received, acupuncture or SA?”  
4  
5 320 Participants will choose one of the following answers: “Acupuncture”, “SA”, or  
6  
7 321 “Unclear”. Prior to the question, patients will be informed that they may have  
8  
9  
10 322 received one of two modalities: acupuncture with a deeper insertion or SA with no  
11  
12 323 skin penetration.

#### 14 324 **Safety assessment**

16 325 The adverse events (AEs) during the entire study will be recorded and described as  
17  
18 326 acupuncture-related AEs and non-acupuncture-related AEs. Acupuncture-related AEs  
19  
20 327 include fainting, broken needle, unbearable pain during acupuncture (VAS  $\geq 8$ , using  
21  
22 328 VAS from 0 [no pain] to 10 [worst pain imaginable]), and other unintended signs or  
23  
24 329 symptoms after acupuncture (e.g., localized hematoma or infection, nausea, dizziness,  
25  
26 330 vomiting, headache, palpitations). Detailed information on AEs including the name,  
27  
28 331 onset, end date, intensity, correlation with acupuncture, and outcomes will be  
29  
30 332 documented in the case report form. Investigators will immediately report serious AEs  
31  
32 333 (eg, requiring hospitalization, causing disability or impaired ability to work) to the  
33  
34 334 Medical Ethics Committee of Guang’anmen Hospital, and stop the clinical trial until  
35  
36 335 further instruction is given.

#### 37 336 **Sample size calculation**

38 337 Based on the results of a previous study,<sup>12</sup> a sample size of 120 participants will be  
39  
40 338 enrolled to provide 80% power to detect a difference of 35% between the combined  
41  
42 339 acupuncture group and waiting-list group in the proportion of participants with  
43  
44 340 treatment response 4 weeks after randomization at a two-sided significance level of  
45  
46 341 0.05. The proportion of participants with treatment response after 4 weeks was  
47  
48 342 assumed to be roughly 12% for the waiting-list group,<sup>12</sup> with an anticipated 10% loss  
49  
50 343 to follow-up.

1  
2  
3 344 **Statistical analysis**  
4

5 345 The null hypothesis is that the proportion of participants with treatment response 4  
6  
7 346 weeks after randomization will be the same for the combined acupuncture groups and  
8  
9 347 waiting-list group. Data will be presented as mean  $\pm$  standard deviation for  
10  
11 348 quantitative variables and frequencies (number of cases), with relative frequencies  
12  
13 349 (percentages) for categorical variables. The primary outcome analysis will use the  
14  
15 350 Cochran-Mantel-Haenszel (CMH) test to compare the response rate between the  
16  
17 351 combined acupuncture groups and the waiting-list group. If the result of this analysis  
18  
19 352 is significant, hierarchical testing will be applied to the acupuncture group versus  
20  
21 353 waiting-list group, SA group versus waiting-list group, and acupuncture group versus  
22  
23 354 SA group. For normally distributed quantitative variables, a repeated-measures  
24  
25 355 analysis of variance (ANOVA) with multiple comparisons post-hoc test will be  
26  
27 356 performed using baseline as a co-variate when comparing more than two groups and  
28  
29 357 an unpaired T test when comparing two groups. For non-normally distributed  
30  
31 358 quantitative variables, the non-parametrical Kruskal-Wallis test and Mann-Whitney  
32  
33 359 test will be performed. For categorical variables, the Chi square ( $\chi^2$ ) test will be used.  
34  
35 360 Confidence intervals for the difference between treatments will be calculated at the  
36  
37 361 95% level. A two-tailed test will be applied for all available data, and a *P* value  $< 0.05$   
38  
39 362 will be considered statistically significant. All analyses in this trial will be performed  
40  
41 363 using SPSS software V.20.0 (IBM SPSS Statistics; IBM Corp, Somers, NY) on the  
42  
43 364 basis of the intention-to-treat (ITT) population, which will include participants who  
44  
45 365 had been randomized. Missing data will be completed as the last value observed  
46  
47 366 before dropout. Only the analysis of primary outcome will be considered in a  
48  
49 367 confirmatory manner. No adjustment will be made for multiple comparisons as those  
50  
51 368 analyses of secondary outcomes will be interpreted as exploratory.  
52  
53  
54  
55  
56  
57  
58  
59  
60



1  
2  
3 369 **Quality control**  
4

5 370 To ensure the quality of the trial, all the relevant staff will be uniformly trained before  
6  
7 371 the trial on the purpose and content of the trial (e.g., diagnosis of chronic PF,  
8  
9 372 inclusion and exclusion criteria, intervention procedures, and outcome measures).  
10  
11 373 Licensed acupuncturists with at least 2 years' acupuncture experience will perform  
12  
13 374 the treatment. Throughout the trial, strict three-level monitoring will be conducted for  
14  
15 375 data quality control. Dropouts and withdrawals including the reasons will be recorded  
16  
17 376 during the trial. Paper-based study data will be stored in locked file cabinets under the  
18  
19 377 management of the investigators. Electronic records will be stored in a Structured  
20  
21 378 Query Language (SQL) server database on a limited access, secure server maintained  
22  
23 379 by the Guang'anmen Hospital, China Academy of Chinese Medical Sciences.  
24  
25  
26  
27

28 380 **Patient and public involvement**  
29

30 381 The research question of whether combined acupuncture and SA will result in larger  
31  
32 382 improvements in heel pain than no acupuncture treatment for patients with chronic PF  
33  
34 383 was first proposed by the investigator after encountering a patient who received SA  
35  
36 384 and reported a similar improvement in heel pain as another patient who received  
37  
38 385 routine acupuncture in the clinic. Patients were not involved in conceiving or  
39  
40 386 implementing the study.  
41  
42  
43

44 387 **Ethics and dissemination**  
45

46 388 This trial will be conducted in accordance with the principles of the Declaration of  
47  
48 389 Helsinki. The study has been registered at the ClinicalTrials.gov (NCT04185259) and  
49  
50 390 approved by the Ethical Committee of the Guang'anmen Hospital, China Academy of  
51  
52 391 Chinese Medical Sciences (approval No: 2019-210-KY). All participants must sign  
53  
54 392 the informed consent form prior to randomization, and they will be permitted to  
55  
56 393 withdraw at any time during the trial, with or without reasons being provided. Any  
57  
58  
59  
60

1  
2  
3 394 amendment or other change of the protocol will need to be approved by the Ethical  
4  
5 395 Committee of the Guang'anmen Hospital, China Academy of Chinese Medical  
6  
7  
8 396 Science, and agreed to by the co-researchers.  
9

10 397 Following analysis of the data, the findings of this study will be submitted for  
11  
12 398 publication in a peer-reviewed medical journal. The results will also be disseminated  
13  
14  
15 399 through presentation at the relevant conferences and scientific meetings.  
16

## 17 400 **Discussion**

18  
19 401 Although several reviews and RCTs<sup>15,16,12,29</sup> have been published that focus on  
20  
21 402 acupuncture for PF, owing to the lack of a placebo control, non-specific physiology  
22  
23 403 effects of needling and spontaneous remission of PF cannot be excluded. To date, this  
24  
25  
26 404 is the first randomized trial with three parallel arms, assessing whether combined  
27  
28 405 acupuncture and SA compared to no treatment control produce a significant reduction  
29  
30 406 in pain intensity in chronic PF. We anticipate that this study will determine the  
31  
32 407 efficacy of acupuncture for patients with chronic PF, and improve the care of these  
33  
34 408 patients in the clinic.  
35  
36

37 409 Though most PF patients will achieve significant improvement in symptoms  
38  
39 410 within 1 year regardless of treatment,<sup>30</sup> many will seek treatment before then. Patients  
40  
41 411 often choose other treatment options when they cannot obtain a satisfactory outcome  
42  
43 412 from conservative treatment (e.g., muscle stretching, heel cups, arch supports, night  
44  
45 413 splints, shockwave therapy, NSAIDs). In this trial, we recruited only chronic  
46  
47 414 participants who had failed to respond to conservative treatment prior to participation.  
48  
49 415 The results can be generalized to patients experiencing chronic refractory PF.  
50  
51

52 416 In this study, pain intensity measured with VAS during the first steps in the  
53  
54 417 morning will be used as the primary outcome. This variable has been used in previous  
55  
56 418 trials<sup>12,21</sup> and is a meaningful subject outcome measure for the assessment of PF  
57  
58  
59  
60

1  
2  
3 419 improvement. In addition, we will also use PPT and PFT as objective secondary  
4  
5 420 outcomes. PPT is an essential evaluation tool for patients suffering from many  
6  
7 421 musculoskeletal disorders including PF and provides a reliable process for measuring  
8  
9 422 participants' responses to mechanical stimuli.<sup>31</sup> Compared to normal asymptomatic  
10  
11 423 patients, patients with PF often exhibit a thickened plantar fascia on ultrasound.<sup>32</sup>  
12  
13 424 Therefore, a PFT evaluation would provide information to detect the anatomical  
14  
15 425 changes that occur in the plantar fascia after acupuncture.  
16  
17  
18

19 426 The strengths of this study include a sham control (non-penetrating at  
20  
21 427 non-acupuncture point) and waitlist control design, objective measurements (i.e. PPT,  
22  
23 428 PFT), strict quality control, and evaluation of the participants' expectations regarding  
24  
25 429 acupuncture. We chose sham acupuncture as a placebo treatment for this study to  
26  
27 430 confirm the specific physiological effect of needling because sham acupuncture may  
28  
29 431 be preferable, particularly for Chinese patients who are familiar with the general  
30  
31 432 procedure of acupuncture. Several limitations to this trial need to be acknowledged.  
32  
33 433 First, it will be impossible to blind the acupuncturists and participants in the waitlist  
34  
35 434 control group, which is a general problem in non-pharmacological interventional trials  
36  
37 435 and can cause bias. Second, a high dropout rate may exist in the waitlist group  
38  
39 436 because participants expect to receive acupuncture treatment when they join the trial.  
40  
41 437 Third, the follow-up period will not exceed 12 weeks, which will not allow for  
42  
43 438 detection of the long-term effects of acupuncture for chronic PF. Fourth, our approach  
44  
45 439 will enable us to draw conclusions about the selected acupuncture points but not about  
46  
47 440 individualized treatments.  
48  
49  
50  
51  
52  
53  
54  
55  
56  
57  
58  
59  
60

1  
2  
3 441  
4

5 442 **Ethical Approval and Consent to participate** The study has received approval from  
6  
7 443 the Institutional Review Boards of Guang'anmen Hospital in China (approval NO.  
8  
9 444 2019-210-KY, TEL +86-10-88001552), and all investigators complied with the  
10  
11  
12 445 Helsinki Declaration.

13  
14 446 **Consent for publication** Not applicable.

15  
16 447 **Availability of data and materials** Not applicable.

17  
18 448 **Competing interests** The authors declare that they have no competing interests.

19  
20 449 **Funding** This RCT is funded by China Academy of Chinese Medical Sciences (Grant  
21  
22 450 No. ZZ13-YQ-019). The funding agency has no role in the design of the study; data  
23  
24 451 collection, management, analysis, and interpretation of the data; preparation, review,  
25  
26 452 or approval of the manuscript.  
27  
28  
29

30  
31 453  
32

33 454 **Authors' contributions** Weiming Wang and Zhishun Liu conceived the idea and  
34  
35 455 designed this trial. Weiming Wang, Zhiwei Zang and Zhishun Liu developed the  
36  
37 456 acupuncture protocol to this article. Weina Zhang, Zhiwei Zang, Sixing Liu and Liang  
38  
39 457 Li will be responsible for the recruitment, acupuncture, and assessment respectively.  
40  
41 458 Yan Liu will be responsible for statistical analysis. This manuscript was drafted by  
42  
43 459 Weiming Wang and Sixing Liu, and was revised by Yan Liu and Zhishun Liu. All  
44  
45 460 authors read and approved the final draft of the manuscript.  
46  
47  
48  
49

50  
51 461  
52

53  
54 462 **Acknowledgments** The authors appreciate the support and efforts from people who  
55  
56 463 will be included in this study.  
57  
58  
59  
60

1  
2  
3  
4  
5  
6  
7  
8  
9  
10  
11  
12  
13  
14  
15  
16  
17  
18  
19  
20  
21  
22  
23  
24  
25  
26  
27  
28  
29  
30  
31  
32  
33  
34  
35  
36  
37  
38  
39  
40  
41  
42  
43  
44  
45  
46  
47  
48  
49  
50  
51  
52  
53  
54  
55  
56  
57  
58  
59  
60

464

465 **References**

- 466 1. Gill LH. Plantar fasciitis: diagnosis and conservative management. *J Am Acad*  
467 *Orthop Surg* 1997;5(2):109-17.
- 468 2. Rosenbaum AJ, DiPreta JA, Misener D. Plantar heel pain. *Med Clin North Am*  
469 2014;98(2):339-52.
- 470 3. Neufeld SK, Cerrato R. Plantar fasciitis: evaluation and treatment. *J Am Acad*  
471 *Orthop Surg* 2008;16(6):338–46.
- 472 4. Cotchett MP, Landorf KB, Munteanu SE, Raspovic A. Effectiveness of trigger  
473 point dry needling for plantar heel pain: study protocol for a randomised  
474 controlled trial. *J Foot Ankle Res.* 2011; 4:5.
- 475 5. Akhbari B, Salavati M, Ezzati K, Mohammadi Rad S. The use of dry needling and  
476 myofascial meridians in a case of plantar fasciitis. *J Chiropr Med*  
477 2014;13(1):43–8.
- 478 6. Cione JA, Cozzarelli J, Mullin CJ. A retrospective study of radiofrequency ther-  
479 mal lesioning for the treatment of neuritis of the medial calcaneal nerve and its  
480 terminal branches in chronic heel pain. *J Foot Ankle Surg* 2009; 48:142-47
- 481 7. Thapa D, Ahuja V. Combination of diagnostic medial calcaneal nerve block  
482 followed by pulsed radiofrequency for plantar fascitis pain: A new modality.  
483 *Indian J Anaesth* 2014; 58:183-85.
- 484 8. Petraglia F, Ramazzina I, Costantino C. Plantar fasciitis in athletes: diagnostic and  
485 treatment strategies. A systematic review. *Muscles Ligaments Tendons J*  
486 2017;7(1):107-18.
- 487 9. Uygur E, Aktaş B, Eceviz E, Yilmazo lu EG, Poyanli O. Preliminary Report on  
488 the Role of Dry Needling Versus Corticosteroid Injection, an Effective Treatment

- 1  
2  
3 489 Method for Plantar Fasciitis: A Randomized Controlled Trial. *J Foot Ankle Surg*  
4  
5 490 2019;58(2):301-5.  
6  
7  
8 491 10. Osman AM, El-Hammady DH, Kotb MM. Pulsed Compared to Thermal  
9  
10 492 Radiofrequency to the Medial Calcaneal Nerve for Management of Chronic  
11  
12 493 Refractory Plantar Fasciitis: A Prospective Comparative Study. *Pain Physician*  
13  
14 494 2016;19(8):E1181-7.  
15  
16  
17 495 11. Young CC, Rutherford DS, Niedfeldt MW. Treatment of plantar fasciitis. *Am Fam*  
18  
19 496 *Physician* 2001;63(3):467-74, 477-8.  
20  
21  
22 497 12. Kummerdee W, Pattapong N. Efficacy of electro-acupuncture in chronic plantar  
23  
24 498 fasciitis: a randomized controlled trial. *Am J Chin Med* 2012;40(6):1167–76.  
25  
26  
27 499 13. Cheuk DKL, Yeung WF, Chung KF, Wong V. Acupuncture for insomnia  
28  
29 500 (Review). *Cochrane Database Syst Rev* 2012; 12;(9):CD005472.  
30  
31 501 14. Wong JY, Rapson LM. Acupuncture in the management of pain of  
32  
33 502 musculoskeletal and neurologic origin. *Phys Med Rehabil Clin N Am*  
34  
35 503 1999;10(3):531–45.  
36  
37  
38 504 15. Clark RJ, Tighe M: The effectiveness of acupuncture for plantar heel pain: a  
39  
40 505 systematic review. *Acupunct Med* 2012;30(4):298–306.  
41  
42  
43 506 16. Thiagarajah AG: How effective is acupuncture for reducing pain due to plantar  
44  
45 507 fasciitis? *Singapore Med J* 2017;58(2):92–7.  
46  
47  
48 508 17. Lundeberg T, Lund I, Sing A, Näslund J. Is Placebo Acupuncture What It Is  
49  
50 509 Intended to Be? *Evid Based Complement Alternat Med* 2011;2011: 932407.  
51  
52  
53 510 18. Chan AW, Tetzlaff JM, Gøtzsche PC, et al. SPIRIT 2013 explanation and  
54  
55 511 elaboration: guidance for protocols of clinical trials. *BMJ* 2013;346:e7586.  
56  
57  
58  
59  
60

- 1  
2  
3 512 19. MacPherson H, Altman DG, Hammerschlag R, et al. Revised Standards for  
4  
5 513 Reporting Interventions in Clinical Trials of Acupuncture (STRICTA): extending  
6  
7 514 the CONSORT statement. *J Evid Based Med* 2010;3:140–55.
- 8  
9  
10 515 20. Martin RL, Davenport TE, Reischl SF, et al. Heel pain-plantar fasciitis: revision  
11  
12 516 2014. *J Orthop Sports Phys Ther* 2014;44(11):A1–33
- 13  
14  
15 517 21. Wang W, Liu Y, Zhao J, et al. Electroacupuncture versus manual acupuncture in  
16  
17 518 the treatment of plantar heel pain syndrome: study protocol for an upcoming  
18  
19 519 randomised controlled trial. *BMJ Open* 2019;9(4):e026147.
- 20  
21 520 22. Standardization Administration of the People’s Republic of China. GB/  
22  
23 521 T12346-2006, Nomenclature and Location of Acupuncture Points [S]. 2006.
- 24  
25  
26 522 23. Zhou K, Fang J, Wang X, et al. Characterization of de qi with electroacupuncture  
27  
28 523 at acupoints with different properties. *J Altern Complement Med*  
29  
30 524 2011;17(11):1007-13.
- 31  
32  
33 525 24. Fischer AA. Pressure algometry over normal muscles. Standard values, validity  
34  
35 526 and reproducibility of pressure threshold. *Pain* 1987;30(1):115-26.
- 36  
37  
38 527 25. Fong CM, Blackburn JT, Norcross MF, et al. Ankle-Dorsiflexion Range of  
39  
40 528 Motion and Landing Biomechanics. *J Athl Train* 2011;46(1):5-10
- 41  
42 529 26. Martin R. Foot and Ankle Ability Measure (FAAM). [http://www. healthsciences.](http://www.healthsciences.duq.edu/pdf/FAAM12-051.pdf)  
43  
44 530 [duq. edu/ pdf/ FAAM12- 051. pdf](http://www.healthsciences.duq.edu/pdf/FAAM12-051.pdf) (Accessed 23 May 2019).
- 45  
46  
47 531 27. González-Sánchez M, Li GZ, Ruiz Muñoz M, et al. Foot and ankle ability  
48  
49 532 measure to measure functional limitations in patients with foot and ankle disorders:  
50  
51 533 a Chinese cross-cultural adaptation and validation. *Disabil Rehabil*  
52  
53 534 2017;39(21):2182–9.

- 1  
2  
3 535 28. Preston CC, Colman AM. Optimal number of response categories in rating scales:  
4  
5 536 reliability, validity, discriminating power, and respondent preferences. *Acta*  
6  
7 537 *Psychol (Amst)* 2000;104(1):1–15.
- 8  
9  
10 538 29. Zhang SP, Yip TP, Li QS. Acupuncture treatment for plantar fasciitis: a  
11  
12 539 randomized controlled trial with six months follow-up. *Evid Based Complement*  
13  
14 540 *Alternat Med* 2011; 2011:1–10.
- 15  
16  
17 541 30. Monteagudo M, Maceira E, Garcia-Virto V, Canosa R. Chronic plantar fasciitis:  
18  
19 542 plantar fasciotomy versus gastrocnemius recession. *Int Orthop*.  
20  
21 543 2013;37(9):1845-50.
- 22  
23  
24 544 31. Saban B, Masharawi Y. Pain threshold tests in patients with heel pain syndrome.  
25  
26 545 *Foot Ankle Int* 2016;37(7):730-6.
- 27  
28  
29 546 32. Mahowald S, Legge BS, Grady JF. The correlation between plantar fascia  
30  
31 547 thickness and symptoms of plantar fasciitis. *J Am Podiatr Med Assoc*  
32  
33 548 2011;101(5):385-9.
- 34  
35  
36  
37  
38  
39  
40  
41  
42  
43  
44  
45  
46  
47  
48  
49  
50  
51  
52  
53  
54  
55  
56  
57  
58  
59  
60



1  
2  
3  
4 **Figure legends**  
5

6 Figure 1: Trial flow diagram  
7

8  
9 Figure 2: Study schedule  
10  
11  
12  
13  
14  
15  
16  
17  
18  
19  
20  
21  
22  
23  
24  
25  
26  
27  
28  
29  
30  
31  
32  
33  
34  
35  
36  
37  
38  
39  
40  
41  
42  
43  
44  
45  
46  
47  
48  
49  
50  
51  
52  
53  
54  
55  
56  
57  
58  
59  
60

For peer review only



Figure 1. Trial flow diagram

Trial flow diagram

234x301mm (300 x 300 DPI)

| TIME POINT (W, week)                               | Study Period |            |             |           |        |
|----------------------------------------------------|--------------|------------|-------------|-----------|--------|
|                                                    | Baseline     | Allocation | Treatment   | Follow-up |        |
|                                                    |              |            | W 4±2d      | W 8±3d    | W16±3d |
| <b>Enrollment</b>                                  |              |            |             |           |        |
| Eligibility criteria                               | ×            |            |             |           |        |
| Demography characteristics                         | ×            |            |             |           |        |
| Disease history of chronic plantar fasciitis       | ×            |            |             |           |        |
| Eligibility screen                                 | ×            |            |             |           |        |
| Informed consent                                   | ×            |            |             |           |        |
| Allocation                                         |              | ×          |             |           |        |
| <b>Interventions</b>                               |              |            |             |           |        |
| Acupuncture                                        |              |            | ×(weeks1-4) |           |        |
| Sham acupuncture                                   |              |            | ×(weeks1-4) |           |        |
| Waitlist control (no treatment)                    |              |            | ×(weeks1-4) |           |        |
| <b>Assessments</b>                                 |              |            |             |           |        |
| Worst pain intensity at first steps in the morning | ×            |            | ×           | ×         | ×      |
| Mean pain intensity during the day                 | ×            |            | ×           | ×         | ×      |
| Pressure pain threshold                            | ×            |            | ×           | ×         | ×      |
| Ankle range of motion                              | ×            |            | ×           | ×         | ×      |
| Foot and Ankle Ability Measure                     | ×            |            | ×           | ×         | ×      |
| Plantar fascia thickness                           | ×            |            | ×           |           |        |
| Participant global improvement assessment          |              |            | ×           | ×         | ×      |
| Participants' expectation towards acupuncture      | ×            |            |             |           |        |
| Blinding assessment                                |              |            |             |           |        |
| Adverse events                                     |              |            | ×           | ×         | ×      |
| Safety assessment                                  |              |            | ×           | ×         | ×      |

Figure 2: study schedule

Study schedule

199x194mm (300 x 300 DPI)

Table 1



SPIRIT 2013 Checklist: Recommended items to address in a clinical trial protocol and related documents\*

| Section/item                      | Item No | Description                                                                                                                                                                                                                                                                              | Addressed on page number |
|-----------------------------------|---------|------------------------------------------------------------------------------------------------------------------------------------------------------------------------------------------------------------------------------------------------------------------------------------------|--------------------------|
| <b>Administrative information</b> |         |                                                                                                                                                                                                                                                                                          |                          |
| Title                             | 1       | Descriptive title identifying the study design, population, interventions, and, if applicable, trial acronym                                                                                                                                                                             | 1                        |
| Trial registration                | 2a      | Trial identifier and registry name. If not yet registered, name of intended registry                                                                                                                                                                                                     | 4                        |
|                                   | 2b      | All items from the World Health Organization Trial Registration Data Set                                                                                                                                                                                                                 | NA                       |
| Protocol version                  | 3       | Date and version identifier                                                                                                                                                                                                                                                              | 3                        |
| Funding                           | 4       | Sources and types of financial, material, and other support                                                                                                                                                                                                                              | 19                       |
| Roles and responsibilities        | 5a      | Names, affiliations, and roles of protocol contributors                                                                                                                                                                                                                                  | 1,19                     |
|                                   | 5b      | Name and contact information for the trial sponsor                                                                                                                                                                                                                                       | 1                        |
|                                   | 5c      | Role of study sponsor and funders, if any, in study design; collection, management, analysis, and interpretation of data; writing of the report; and the decision to submit the report for publication, including whether they will have ultimate authority over any of these activities | 19                       |
|                                   | 5d      | Composition, roles, and responsibilities of the coordinating centre, steering committee, endpoint adjudication committee, data management team, and other individuals or groups overseeing the trial, if applicable (see Item 21a for data monitoring committee)                         | NA                       |

## Introduction

|                          |    |                                                                                                                                                                                                           |     |
|--------------------------|----|-----------------------------------------------------------------------------------------------------------------------------------------------------------------------------------------------------------|-----|
| Background and rationale | 6a | Description of research question and justification for undertaking the trial, including summary of relevant studies (published and unpublished) examining benefits and harms for each intervention        | 4-5 |
|                          | 6b | Explanation for choice of comparators                                                                                                                                                                     | 4-5 |
| Objectives               | 7  | Specific objectives or hypotheses                                                                                                                                                                         | 5   |
| Trial design             | 8  | Description of trial design including type of trial (eg, parallel group, crossover, factorial, single group), allocation ratio, and framework (eg, superiority, equivalence, noninferiority, exploratory) | 5   |

## Methods: Participants, interventions, and outcomes

|                      |     |                                                                                                                                                                                                                                                                                                                                                                                |       |
|----------------------|-----|--------------------------------------------------------------------------------------------------------------------------------------------------------------------------------------------------------------------------------------------------------------------------------------------------------------------------------------------------------------------------------|-------|
| Study setting        | 9   | Description of study settings (eg, community clinic, academic hospital) and list of countries where data will be collected. Reference to where list of study sites can be obtained                                                                                                                                                                                             | 6     |
| Eligibility criteria | 10  | Inclusion and exclusion criteria for participants. If applicable, eligibility criteria for study centres and individuals who will perform the interventions (eg, surgeons, psychotherapists)                                                                                                                                                                                   | 7-8   |
| Interventions        | 11a | Interventions for each group with sufficient detail to allow replication, including how and when they will be administered                                                                                                                                                                                                                                                     | 8-10  |
|                      | 11b | Criteria for discontinuing or modifying allocated interventions for a given trial participant (eg, drug dose change in response to harms, participant request, or improving/worsening disease)                                                                                                                                                                                 | 14    |
|                      | 11c | Strategies to improve adherence to intervention protocols, and any procedures for monitoring adherence (eg, drug tablet return, laboratory tests)                                                                                                                                                                                                                              | 10    |
|                      | 11d | Relevant concomitant care and interventions that are permitted or prohibited during the trial                                                                                                                                                                                                                                                                                  | 10    |
| Outcomes             | 12  | Primary, secondary, and other outcomes, including the specific measurement variable (eg, systolic blood pressure), analysis metric (eg, change from baseline, final value, time to event), method of aggregation (eg, median, proportion), and time point for each outcome. Explanation of the clinical relevance of chosen efficacy and harm outcomes is strongly recommended | 11-13 |

|                      |    |                                                                                                                                                                                       |          |
|----------------------|----|---------------------------------------------------------------------------------------------------------------------------------------------------------------------------------------|----------|
| Participant timeline | 13 | Time schedule of enrolment, interventions (including any run-ins and washouts), assessments, and visits for participants. A schematic diagram is highly recommended (see Figure)      | Figure 2 |
| Sample size          | 14 | Estimated number of participants needed to achieve study objectives and how it was determined, including clinical and statistical assumptions supporting any sample size calculations | 14       |
| Recruitment          | 15 | Strategies for achieving adequate participant enrolment to reach target sample size                                                                                                   | 6        |

### Methods: Assignment of interventions (for controlled trials)

#### Allocation:

|                                  |     |                                                                                                                                                                                                                                                                                                                                                          |    |
|----------------------------------|-----|----------------------------------------------------------------------------------------------------------------------------------------------------------------------------------------------------------------------------------------------------------------------------------------------------------------------------------------------------------|----|
| Sequence generation              | 16a | Method of generating the allocation sequence (eg, computer-generated random numbers), and list of any factors for stratification. To reduce predictability of a random sequence, details of any planned restriction (eg, blocking) should be provided in a separate document that is unavailable to those who enrol participants or assign interventions | 6  |
| Allocation concealment mechanism | 16b | Mechanism of implementing the allocation sequence (eg, central telephone; sequentially numbered, opaque, sealed envelopes), describing any steps to conceal the sequence until interventions are assigned                                                                                                                                                | 6  |
| Implementation                   | 16c | Who will generate the allocation sequence, who will enrol participants, and who will assign participants to interventions                                                                                                                                                                                                                                | 6  |
| Blinding (masking)               | 17a | Who will be blinded after assignment to interventions (eg, trial participants, care providers, outcome assessors, data analysts), and how                                                                                                                                                                                                                | 6  |
|                                  | 17b | If blinded, circumstances under which unblinding is permissible, and procedure for revealing a participant's allocated intervention during the trial                                                                                                                                                                                                     | NA |

### Methods: Data collection, management, and analysis

|                         |     |                                                                                                                                                                                                                                                                                                                                                                                                              |   |
|-------------------------|-----|--------------------------------------------------------------------------------------------------------------------------------------------------------------------------------------------------------------------------------------------------------------------------------------------------------------------------------------------------------------------------------------------------------------|---|
| Data collection methods | 18a | Plans for assessment and collection of outcome, baseline, and other trial data, including any related processes to promote data quality (eg, duplicate measurements, training of assessors) and a description of study instruments (eg, questionnaires, laboratory tests) along with their reliability and validity, if known. Reference to where data collection forms can be found, if not in the protocol | 6 |
|-------------------------|-----|--------------------------------------------------------------------------------------------------------------------------------------------------------------------------------------------------------------------------------------------------------------------------------------------------------------------------------------------------------------------------------------------------------------|---|

|    |             |     |                                                                                  |
|----|-------------|-----|----------------------------------------------------------------------------------|
| 1  |             |     |                                                                                  |
| 2  |             |     |                                                                                  |
| 3  |             |     |                                                                                  |
| 4  |             |     |                                                                                  |
| 5  |             | 18b | Plans to promote participant retention and complete follow-up, including list 15 |
| 6  |             |     | of any outcome data to be collected for participants who discontinue or          |
| 7  |             |     | deviate from intervention protocols                                              |
| 8  |             |     |                                                                                  |
| 9  |             |     |                                                                                  |
| 10 | Data        | 19  | Plans for data entry, coding, security, and storage, including any related 15    |
| 11 | management  |     | processes to promote data quality (eg, double data entry; range checks for       |
| 12 |             |     | data values). Reference to where details of data management procedures           |
| 13 |             |     | can be found, if not in the protocol                                             |
| 14 |             |     |                                                                                  |
| 15 | Statistical | 20a | Statistical methods for analysing primary and secondary outcomes. 14-15          |
| 16 | methods     |     | Reference to where other details of the statistical analysis plan can be         |
| 17 |             |     | found, if not in the protocol                                                    |
| 18 |             |     |                                                                                  |
| 19 |             |     |                                                                                  |
| 20 |             | 20b | Methods for any additional analyses (eg, subgroup and adjusted analyses) NA      |
| 21 |             |     |                                                                                  |
| 22 |             | 20c | Definition of analysis population relating to protocol non-adherence (eg, as     |
| 23 |             |     | randomised analysis), and any statistical methods to handle missing data 14-15   |
| 24 |             |     | (eg, multiple imputation)                                                        |
| 25 |             |     |                                                                                  |
| 26 |             |     |                                                                                  |

## Methods: Monitoring

|    |            |     |                                                                                |
|----|------------|-----|--------------------------------------------------------------------------------|
| 27 |            |     |                                                                                |
| 28 |            |     |                                                                                |
| 29 | Data       | 21a | Composition of data monitoring committee (DMC); summary of its role and NA     |
| 30 | monitoring |     | reporting structure; statement of whether it is independent from the sponsor   |
| 31 |            |     | and competing interests; and reference to where further details about its      |
| 32 |            |     | charter can be found, if not in the protocol. Alternatively, an explanation of |
| 33 |            |     | why a DMC is not needed                                                        |
| 34 |            |     |                                                                                |
| 35 |            |     |                                                                                |
| 36 |            | 21b | Description of any interim analyses and stopping guidelines, including who 14  |
| 37 |            |     | will have access to these interim results and make the final decision to       |
| 38 |            |     | terminate the trial                                                            |
| 39 |            |     |                                                                                |
| 40 | Harms      | 22  | Plans for collecting, assessing, reporting, and managing solicited and 13-14   |
| 41 |            |     | spontaneously reported adverse events and other unintended effects of          |
| 42 |            |     | trial interventions or trial conduct                                           |
| 43 |            |     |                                                                                |
| 44 |            |     |                                                                                |
| 45 | Auditing   | 23  | Frequency and procedures for auditing trial conduct, if any, and whether 15    |
| 46 |            |     | the process will be independent from investigators and the sponsor             |
| 47 |            |     |                                                                                |

## Ethics and dissemination

|    |          |    |                                                                              |
|----|----------|----|------------------------------------------------------------------------------|
| 48 |          |    |                                                                              |
| 49 |          |    |                                                                              |
| 50 | Research | 24 | Plans for seeking research ethics committee/institutional review board 16,19 |
| 51 | ethics   |    | (REC/IRB) approval                                                           |
| 52 | approval |    |                                                                              |
| 53 |          |    |                                                                              |
| 54 |          |    |                                                                              |
| 55 |          |    |                                                                              |
| 56 |          |    |                                                                              |
| 57 |          |    |                                                                              |
| 58 |          |    |                                                                              |
| 59 |          |    |                                                                              |
| 60 |          |    |                                                                              |

|    |                   |     |                                                                                   |    |
|----|-------------------|-----|-----------------------------------------------------------------------------------|----|
| 1  |                   |     |                                                                                   |    |
| 2  |                   |     |                                                                                   |    |
| 3  |                   |     |                                                                                   |    |
| 4  |                   |     |                                                                                   |    |
| 5  | Protocol          | 25  | Plans for communicating important protocol modifications (eg, changes to          | 16 |
| 6  | amendments        |     | eligibility criteria, outcomes, analyses) to relevant parties (eg, investigators, |    |
| 7  |                   |     | REC/IRBs, trial participants, trial registries, journals, regulators)             |    |
| 8  |                   |     |                                                                                   |    |
| 9  | Consent or        | 26a | Who will obtain informed consent or assent from potential trial participants      | 6  |
| 10 | assent            |     | or authorised surrogates, and how (see Item 32)                                   |    |
| 11 |                   |     |                                                                                   |    |
| 12 |                   | 26b | Additional consent provisions for collection and use of participant data and      | NA |
| 13 |                   |     | biological specimens in ancillary studies, if applicable                          |    |
| 14 |                   |     |                                                                                   |    |
| 15 |                   |     |                                                                                   |    |
| 16 | Confidentiality   | 27  | How personal information about potential and enrolled participants will be        | 19 |
| 17 |                   |     | collected, shared, and maintained in order to protect confidentiality before,     |    |
| 18 |                   |     | during, and after the trial                                                       |    |
| 19 |                   |     |                                                                                   |    |
| 20 | Declaration of    | 28  | Financial and other competing interests for principal investigators for the       | 19 |
| 21 | interests         |     | overall trial and each study site                                                 |    |
| 22 |                   |     |                                                                                   |    |
| 23 |                   |     |                                                                                   |    |
| 24 | Access to         | 29  | Statement of who will have access to the final trial dataset, and disclosure      | 19 |
| 25 | data              |     | of contractual agreements that limit such access for investigators                |    |
| 26 |                   |     |                                                                                   |    |
| 27 | Ancillary and     | 30  | Provisions, if any, for ancillary and post-trial care, and for compensation to    | NA |
| 28 | post-trial care   |     | those who suffer harm from trial participation                                    |    |
| 29 |                   |     |                                                                                   |    |
| 30 | Dissemination     | 31a | Plans for investigators and sponsor to communicate trial results to               | 16 |
| 31 | policy            |     | participants, healthcare professionals, the public, and other relevant groups     |    |
| 32 |                   |     | (eg, via publication, reporting in results databases, or other data sharing       |    |
| 33 |                   |     | arrangements), including any publication restrictions                             |    |
| 34 |                   |     |                                                                                   |    |
| 35 |                   |     |                                                                                   |    |
| 36 |                   | 31b | Authorship eligibility guidelines and any intended use of professional            | 19 |
| 37 |                   |     | writers                                                                           |    |
| 38 |                   |     |                                                                                   |    |
| 39 |                   | 31c | Plans, if any, for granting public access to the full protocol, participant-level | NA |
| 40 |                   |     | dataset, and statistical code                                                     |    |
| 41 |                   |     |                                                                                   |    |
| 42 |                   |     |                                                                                   |    |
| 43 | <b>Appendices</b> |     |                                                                                   |    |
| 44 |                   |     |                                                                                   |    |
| 45 | Informed          | 32  | Model consent form and other related documentation given to participants          | NA |
| 46 | consent           |     | and authorised surrogates                                                         |    |
| 47 | materials         |     |                                                                                   |    |
| 48 |                   |     |                                                                                   |    |
| 49 | Biological        | 33  | Plans for collection, laboratory evaluation, and storage of biological            | NA |
| 50 | specimens         |     | specimens for genetic or molecular analysis in the current trial and for          |    |
| 51 |                   |     | future use in ancillary studies, if applicable                                    |    |
| 52 |                   |     |                                                                                   |    |
| 53 |                   |     |                                                                                   |    |
| 54 |                   |     |                                                                                   |    |
| 55 |                   |     |                                                                                   |    |
| 56 |                   |     |                                                                                   |    |
| 57 |                   |     |                                                                                   |    |
| 58 |                   |     |                                                                                   |    |
| 59 |                   |     |                                                                                   |    |
| 60 |                   |     |                                                                                   |    |



1  
2  
3  
4  
5 \*It is strongly recommended that this checklist be read in conjunction with the SPIRIT 2013 Explanation &  
6 Elaboration for important clarification on the items. Amendments to the protocol should be tracked and dated.  
7 The SPIRIT checklist is copyrighted by the SPIRIT Group under the Creative Commons "[Attribution-  
8 NonCommercial-NoDerivs 3.0 Unported](#)" license.  
9  
10  
11  
12  
13  
14  
15  
16  
17  
18  
19  
20  
21  
22  
23  
24  
25  
26  
27  
28  
29  
30  
31  
32  
33  
34  
35  
36  
37  
38  
39  
40  
41  
42  
43  
44  
45  
46  
47  
48  
49  
50  
51  
52  
53  
54  
55  
56  
57  
58  
59  
60
